# Supplementary material for: An integrated approach to the discovery of potent agelastatin A analogues for brain tumors: chemical synthesis and biological, physicochemical and CNS pharmacokinetic analyses
Source: Royal Society of Chemistry journal article supplement (doi:10.1039/c3md00094j), 2013-01-01

# Integrated Approach to the Discovery of Potent Agelastatin A Analogues for Brain Tumors: Chemical Synthesis and Biological, Physicochemical and CNS Pharmacokinetic Analyses

Zhimin Li,<sup>c,‡</sup> Daisuke Shigeoka,<sup>a,‡</sup> Thomas R. Caulfield,<sup>d</sup> Takashi Kawachi,<sup>a</sup> Yushi Qiu,<sup>c</sup>

Takuma Kamon,<sup>a</sup> Masayoshi Arai,<sup>a</sup> Han W. Tun<sup>\*,b</sup> and Takehiko Yoshimitsu<sup>\*,a</sup>

<sup>a</sup> Graduate School of Pharmaceutical Sciences, Osaka University, 1-6 Yamadaoka, Suita, Osaka 565-0871, Japan

<sup>b</sup> Department of Hematology/Oncology, Mayo Clinic, Jacksonville, Florida, 32224, USA

<sup>c</sup> Department of Cancer Biology, Mayo Clinic, Jacksonville, Florida, 32224, USA

<sup>d</sup> Mayo Clinic College of Medicine, Dept. of Neuroscience, Jacksonville, Florida, 32224, USA

yoshimit@phs.osaka-u.ac.jp, tun.han@mayo.edu

## Supplementary Information

|                                                                |        |                                  |     |
|----------------------------------------------------------------|--------|----------------------------------|-----|
| <u>Chemical synthesis of AA analogues: General</u>             | S2     |                                  |     |
| <u>Modified synthesis of AA (1):</u>                           | S2     |                                  |     |
| <u>Synthesis of compound 4:</u>                                | S4     | <u>Synthesis of compound 6:</u>  | S5  |
| <u>Synthesis of compound 7:</u>                                | S6     | <u>Synthesis of compound 8:</u>  | S7  |
| <u>Synthesis of compound 9:</u>                                | S8     | <u>Synthesis of compound 10:</u> | S9  |
| <u>Synthesis of compound 12:</u>                               | S9     | <u>Synthesis of compound 13:</u> | S10 |
| <u>Synthesis of compound 14:</u>                               | S11    | <u>Synthesis of compound 15:</u> | S11 |
| <u>Synthesis of compound 16:</u>                               | S12    | <u>Synthesis of compound 17:</u> | S13 |
| <u>Synthesis of compound 18:</u>                               | S14    |                                  |     |
| <u>Cell proliferation Assay:</u>                               | S14    |                                  |     |
| <u>Chemoinformatic Analysis of AA analogues:</u>               | S15    |                                  |     |
| <u>CNS pharmacokinetic (PK) analysis of AA analogues:</u>      | S19    |                                  |     |
| <u>References:</u>                                             | S21    |                                  |     |
| <u>Copies of <sup>1</sup>H NMR/<sup>13</sup>C NMR Spectra:</u> | S22-51 |                                  |     |

### Chemical synthesis of AA analogues:

**General.** Melting points are uncorrected. All reagents were used as received from commercial suppliers unless otherwise noted.  $^1\text{H}$  NMR spectra (500 or 400 MHz) and  $^{13}\text{C}$  NMR spectra (125 or 100 MHz) were measured in the specified solvents. Chemical shifts are reported in ppm relative to the internal solvent signal [chloroform-*d*: 7.26 ppm ( $^1\text{H}$  NMR), 77.0 ppm ( $^{13}\text{C}$  NMR); methanol-*d*: 3.30 ppm ( $^1\text{H}$  NMR), 49.0 ppm ( $^{13}\text{C}$  NMR)]. The proton signal of TMS (0.00 ppm) or DMSO (2.50 ppm) was also used in some cases as the internal standard for  $^1\text{H}$  NMR spectra. FT-IR spectra were recorded for samples loaded on KBr powder using the diffuse reflectance method, dispersed in KBr pellet, or loaded as neat film on NaCl plate. Mass spectra were obtained according to the specified technique. Analytical thin layer chromatography (TLC) was performed using Kieselgel 60 F<sub>254</sub>. Compounds were visualized with UV light and stained with anisaldehyde solution, phosphomolybdic acid in EtOH, iodine, or  $\text{KMnO}_4$  solution. The preparation of compounds **1**, **2**, **3**, **5** and **11** has previously been reported.<sup>1</sup> A modified protocol for oxidation of compound **3** using PDC in DMF was described below.

### Chemical synthesis of AA analogues:

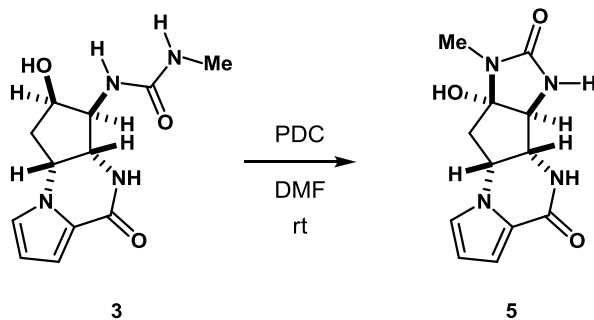

**(5a*S*,5b*S*,8a*S*,9a*R*)-8a-Hydroxy-8-methyl-5,5a,5b,6,8,8a,9,9a-octahydroimidazo[4',5':4,5]cyclopenta[1,2-*e*]pyrrolo[1,2-*a*]pyrazine-4,7-dione [Debromoagelastatin A (DeBAA)] (**5**):** A single-necked, 100 mL round-bottomed flask equipped with a magnetic stir bar was charged with the known urea **3** (140 mg, 0.53 mmol)<sup>1a,b</sup> and DMF (27 mL) at room temperature. To the mixture was added pyridinium dichromate (PDC) (598 mg, 1.59 mmol), and the mixture was stirred at room temperature. After 21 h, *i*-PrOH (0.12 mL) was added, and the mixture was stirred for an additional 10

min and concentrated under reduced pressure. The residue was charged onto a column of flash silica gel/florisil (slurry packed) and eluted with MeOH/EtOAc (1:10→1:3v/v) to give debromoagelastatin A (DeBAA) (**5**) (86 mg, 62%) as a colorless solid. **Debromoagelastatin A (DeBAA) (5)**:  $[\alpha]_D^{21} -68.1$  (*c* 0.775, MeOH); IR (KBr)  $\nu$  3279, 2924, 1690, 1645  $\text{cm}^{-1}$ ;  $^1\text{H}$  NMR (400 MHz,  $\text{CD}_3\text{OD}$ )  $\delta$  7.02 (dd, 1H, *J* = 2.7, 1.4 Hz), 6.88 (dd, 1H, *J* = 4.1, 1.4 Hz), 6.23 (dd, 1H, *J* = 4.1, 2.7 Hz), 4.65 (ddd, 1H, *J* = 10.1, 6.4, 6.0 Hz), 3.99 (dd, 1H, *J* = 6.0, 1.4 Hz), 3.81 (d, 1H, *J* = 1.2 Hz), 2.79 (s, 3H), 2.61 (dd, 1H, *J* = 13.7, 6.4 Hz), 2.27 (dd, 1H, *J* = 13.7, 10.1 Hz);  $^{13}\text{C}$  NMR (100 MHz,  $\text{CD}_3\text{OD}$ )  $\delta$  162.1, 161.3, 125.7, 122.8, 115.4, 111.1, 95.8, 68.0, 62.8, 55.6, 41.6, 24.2. MS *m/z*: 263  $[\text{M}+1]^+$ , 59 (100%); HRMS (FAB) calcd for  $\text{C}_{12}\text{H}_{15}\text{N}_4\text{O}_3$   $[\text{M}+\text{H}]^+$ : 263.1144, found: 263.1146.<sup>1a</sup>

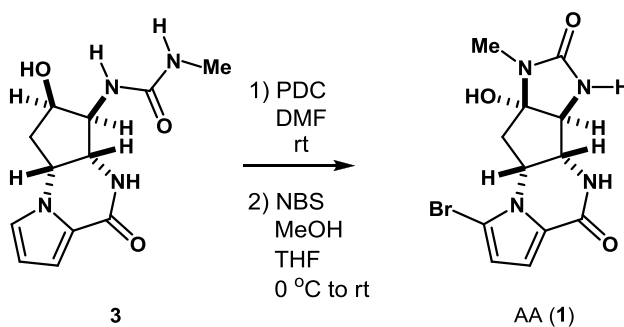

**Synthesis of AA (1) by a modified protocol (2 step conversion of urea 3 to AA):**  
**(5a*S*,5b*S*,8a*S*,9a*R*)-1-Bromo-8a-hydroxy-8-methyl-5,5a,5b,6,8,8a,9,9a-**  
**octahydroimidazo [4',5':4,5]cyclopenta[1,2-*e*]pyrrolo[1,2-*a*]pyrazine-4,7-dione**

**[Agelastatin A (AA)] (1):** A single-necked, 200 mL round-bottomed flask equipped with a magnetic stir bar was charged with alcohol **3** (310 mg, 1.17 mmol) and DMF (60 mL) at room temperature. To the mixture was added pyridinium dichromate (PDC) (1.33 g, 3.52 mmol), and the mixture was stirred at room temperature. After 18 h, *i*-PrOH (0.3 mL) was added, and the mixture was stirred for an additional 10 min and concentrated under reduced pressure. The residue was charged onto a column of flash silica gel/florisil (slurry packed) and eluted with MeOH/ $\text{CH}_2\text{Cl}_2$  (1:5 v/v) to give debromoagelastatin A (DeBAA) (**5**) (328 mg; containing traces of inseparable unreacted urea **3** and unidentified impurities) as solids. The material **5** was dissolved in a mixed solvent of MeOH (35 mL) and THF (70 mL). Then NBS (63 mg, 0.354 mmol) was added to the mixture at 0°C, and

the whole mixture was allowed to warm to room temperature. After 40 min of stirring, the mixture was again cooled to 0°C, and NBS (21 mg, 0.118 mmol) was added. Stirring was continued for 30 min at room temperature, and the mixture was again cooled to 0°C. To this was added NBS (21 mg, 0.118 mmol), and the mixture was allowed to warm to room temperature. After being stirred at the same temperature for 20 min, the mixture was concentrated under reduced pressure. The residue was purified by flash silica gel column chromatography (MeOH/CH<sub>2</sub>Cl<sub>2</sub> 1:10)\* to give agelastatin A (**1**) (AA) (164 mg, 41% in 2 steps from urea **3**) as a white solid. \*MeOH/H<sub>2</sub>O/EtOAc (1:1:33 v/v) was also suitable for purification of the synthetic agelastatin by flash silica gel column chromatography. **Recrystallization:** A crystalline sample of agelastatin A (210 mg) was obtained by recrystallization of 258 mg of agelastatin A from MeOH. **Agelastatin A (AA) (1):** Mp 203-205 °C; [ $\alpha$ ]<sub>D</sub><sup>27</sup> -82.2 (*c* 0.14, MeOH); IR (KBr)  $\nu$  3258, 2953, 1643 cm<sup>-1</sup>; <sup>1</sup>H NMR (500 MHz, CD<sub>3</sub>OD)  $\delta$  6.91 (d, 1H, *J* = 4.3 Hz), 6.32 (d, 1H, *J* = 4.3 Hz), 4.59 (ddd, 1H, *J* = 12.2, 6.1, 5.5 Hz), 4.07 (dd, 1H, *J* = 5.5 Hz), 3.87 (s, 1H), 2.80 (s, 3H), 2.64 (dd, 1H, *J* = 12.8, 6.1 Hz), 2.09 (dd, 1H, *J* = 12.8, 12.2 Hz); <sup>13</sup>C NMR (100 MHz, CD<sub>3</sub>OD)  $\delta$  161.4, 161.1, 124.1, 116.0, 113.8, 107.3, 95.7, 67.4, 62.2, 54.3, 40.0, 24.2. MS *m/z*: 341 [M+1]<sup>+</sup>, 93 (100%); HRMS (FAB) calcd for C<sub>12</sub>H<sub>14</sub>N<sub>4</sub>O<sub>3</sub><sup>79</sup>Br [M+H]<sup>+</sup>: 341.0249, found 341.0271.<sup>1a</sup>

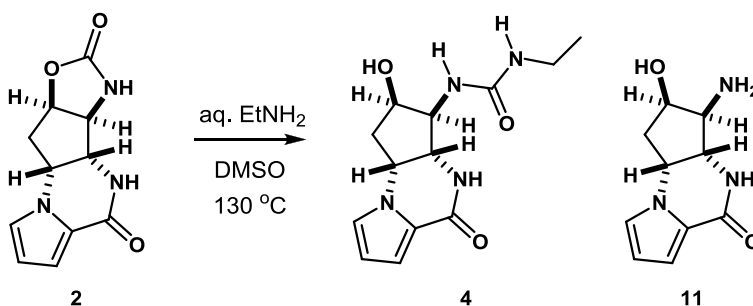

**1-Ethyl-3-((2*R*,3*S*,3*aS*,9*aR*)-2-Hydroxy-5-oxo-2,3,3*a*,4,5,9*a*-hexahydro-1*H*-cyclopenta[*e*]pyrrolo[1,2-*a*]pyrazin-3-yl)urea [Urea (**4**):** To a solution of compound **2** (36.4 mg, 0.165 mmol)<sup>1</sup> in DMSO (2.28 mL) in a stainless steel tube was added 70% aq. EtNH<sub>2</sub> (2.28 mL, 28 mmol) at room temperature, and the mixture was heated at 130 °C for 10 h. Additional aq. EtNH<sub>2</sub> (0.5 mL, 6.14 mmol; 70% v/v) was added and heating was continued at 130 °C for further 6 h. After concentration of the mixture under reduced

pressure, the residue was rinsed with MeOH to leave unreacted compound **2** (11.8 mg, 32% recovered) as a colorless solid. Concentration of the MeOH extracts under reduced pressure followed by flash column chromatography (MeOH/CH<sub>2</sub>Cl<sub>2</sub> 1:6→1:5 v/v) of the resultant residue afforded urea **4** (18.7 mg, 43%) as a colorless solid. Further elution using MeOH as eluent afforded β-aminoalcohol **11** (5.7 mg, 18%) as a colorless solid. **Urea 4**:  $[\alpha]_D^{25}$  -177.0 (*c* 0.565, MeOH); IR (KBr)  $\nu$  3279, 1634 cm<sup>-1</sup>; <sup>1</sup>H NMR (400 MHz, CD<sub>3</sub>OD)  $\delta$  7.00 (dd, 1H, *J* = 2.7, 1.8 Hz), 6.85 (dd, 1H, *J* = 3.7, 1.8 Hz), 6.27 (dd, 1H, *J* = 3.7, 2.7 Hz), 4.70 (dt, 1H, *J* = 6.9, 4.6 Hz), 4.17 (m, 1H), 3.97 (m, 2H), 3.13 (q, 2H, *J* = 7.3 Hz), 2.52 (m, 1H), 2.38 (ddd, 1H, *J* = 15.1, 7.3, 2.7 Hz), 1.09 (t, 3H, *J* = 7.3 Hz); <sup>13</sup>C NMR (125 MHz, CD<sub>3</sub>OD)  $\delta$  161.36, 160.83, 124.45, 123.55, 114.83, 111.51, 69.35, 60.59, 59.43, 53.12, 41.00, 35.80, 15.66; MS *m/z*: 279 [M+1]<sup>+</sup>, 93 (100%); HRMS (FAB) calcd for C<sub>13</sub>H<sub>19</sub>N<sub>4</sub>O<sub>3</sub> [M+H]<sup>+</sup>: 279.1457, found: 279.1483. The spectral and analytical data of β-aminoalcohol **11** were identical with those previously reported.<sup>7j</sup>

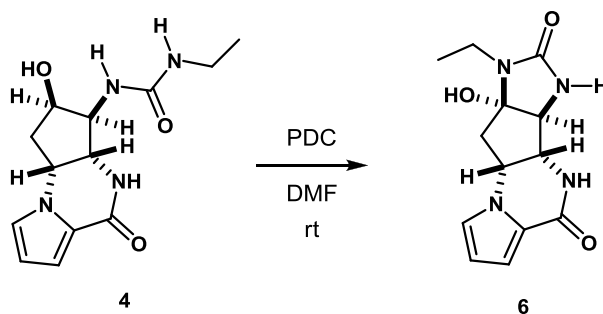

**(5a*S*,5b*S*,8a*S*,9a*R*)-8-Ethyl-8a-hydroxy-5,5a,5b,6,8,8a,9,9a-octahydroimidazo[4',5':4,5]cyclopenta[1,2-*e*]pyrrolo[1,2-*a*]pyrazine-4,7-dione**

**[Debromoethylagelastatin A (DeBEAA)](6)**: To a stirred solution of urea **4** (32.3 mg, 0.116 mmol) in DMF (3.3 mL) was added pyridinium dichromate (PDC) (131 mg, 0.35 mmol). After 73 h, *i*-PrOH (27  $\mu$ L) was added, and the mixture was stirred for additional 10 min and concentrated under reduced pressure. The residue was charged onto a column of flash silica gel/florisil (slurry packed) and eluted with MeOH/CH<sub>2</sub>Cl<sub>2</sub> (1:12 v/v) to give debromoethylagelastatin A (DeBEAA) (**6**) (18 mg, 57%) as a colorless solid. **Debromoethylagelastatin A (DeBEAA) (6)**:  $[\alpha]_D^{25}$  -54.4 (*c* 0.20, MeOH); IR (KBr)  $\nu$  3236, 1653 cm<sup>-1</sup>; <sup>1</sup>H NMR (400 MHz, CD<sub>3</sub>OD)  $\delta$  7.02 (dd, 1H, *J* = 2.8, 1.2 Hz), 6.88 (dd,

1H,  $J = 3.6, 1.2$  Hz), 6.23 (dd, 1H,  $J = 3.6, 2.8$  Hz), 4.65 (ddd, 1H,  $J = 10.0, 6.0, 6.0$  Hz), 3.99 (dd, 1H,  $J = 4.8, 1.2$  Hz), 3.77 (d, 1H,  $J = 1.2$  Hz), 3.36 (m, 1H), 3.20 (m, 1H), 2.59 (dd, 1H,  $J = 13.2, 6.4$  Hz), 2.37 (dd, 1H,  $J = 13.2, 10.0$  Hz), 1.25 (t, 3H,  $J = 7.2$  Hz);  $^{13}\text{C}$  NMR (125 MHz,  $\text{CD}_3\text{OD}$ )  $\delta$  162.00, 161.28, 125.61, 122.94, 115.44, 111.13, 96.37, 68.31, 62.96, 55.66, 42.86, 35.20, 15.87; MS  $m/z$ : 277  $[\text{M}+1]^+$ , 154 (100%); HRMS (FAB) calcd for  $\text{C}_{13}\text{H}_{17}\text{N}_4\text{O}_3$   $[\text{M}+\text{H}]^+$ : 277.1301, found: 277.1310.

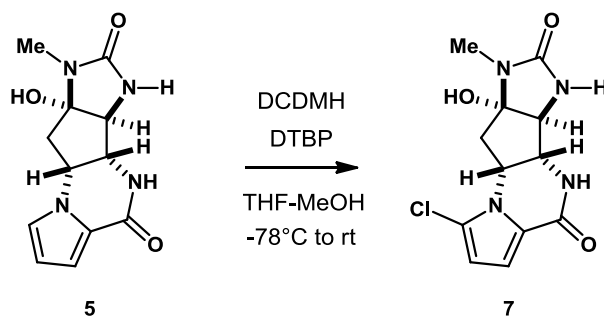

**(5a*S*,5b*S*,8a*S*,9a*R*)-1-Chloro-8a-hydroxy-8-methyl-5,5a,5b,6,8,8a,9,9a-octahydroimidazo[4',5':4,5]cyclopenta[1,2-*e*]pyrrolo[1,2-*a*]pyrazine-4,7-dione**

**[Chloroagelastatin A (CAA)] (7):** To a stirred solution of debromoagelastatin A (DeBAA) (**5**)<sup>1</sup> (40 mg, 0.153 mmol) in THF-MeOH (4.5 mL; 2:1 v/v) in a dry ice/acetone cooling bath (-78 °C) were added 2,6-di-*tert*-butylpyridine (DTBP) (51  $\mu\text{L}$ ; 0.230 mmol) and dichlorodimethylhydantoin (DCDMH) (30.1 mg in THF-MeOH 500  $\mu\text{L}$ ; 2:1 v/v, 0.153 mmol). Following removal of the dry ice/acetone bath, stirring was continued for 45 min at room temperature. The mixture was quenched with  $\text{Et}_3\text{N}$  (213  $\mu\text{L}$ ; 1.53 mmol) and 2-methyl-2-butene (162  $\mu\text{L}$ ; 1.53 mmol, and concentrated under reduced pressure. The residue was purified by flash silica gel column chromatography (MeOH/EtOAc/ $\text{H}_2\text{O}$  1:50:1 v/v/v) to give chloroagelastatin A (CAA) (**7**) (29.2 mg, 67%) as a colorless solid.

**Chloroagelastatin A (CAA) (7):**  $[\alpha]_D^{25}$  -29.1 ( $c$  0.225, MeOH); IR (KBr)  $\nu$  3333, 1636  $\text{cm}^{-1}$ ;  $^1\text{H}$  NMR (400 MHz,  $\text{CD}_3\text{OD}$ )  $\delta$  6.85 (d, 1H,  $J = 4.1$  Hz), 6.19 (d, 1H,  $J = 4.1$  Hz), 4.58 (ddd, 1H,  $J = 12.4, 6.4, 5.5$  Hz), 4.04 (d, 1H,  $J = 5.5$  Hz), 3.83 (s, 1H), 2.75 (s, 3H), 2.59 (dd, 1H,  $J = 13.3, 6.4$  Hz), 2.06 (dd, 1H,  $J = 12.8, 12.4$  Hz);  $^{13}\text{C}$  NMR (100 MHz,  $\text{CD}_3\text{OD}$ )  $\delta$  161.4, 161.1, 122.4, 120.7, 115.3, 110.0, 95.8, 67.4, 62.3, 53.1, 40.0, 24.2; MS  $m/z$ : 297  $[\text{M}+1]^+$ , 93 (100%); HRMS (FAB) calcd for  $\text{C}_{12}\text{H}_{14}\text{ClN}_4\text{O}_3$   $[\text{M}+\text{H}]^+$ : 297.0754, found: 297.0762.

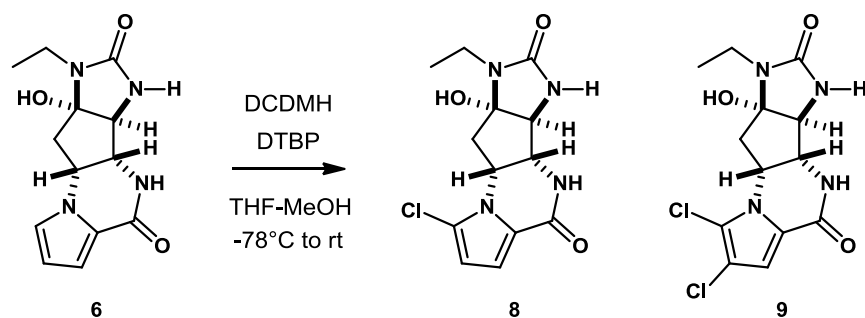

**(5a*S*,5b*S*,8a*S*,9a*R*)-1-Chloro-8-ethyl-8a-hydroxy-5,5a,5b,6,8,8a,9,9a-octahydroimidazo[4',5':4,5]cyclopenta[1,2-*e*]pyrrolo[1,2-*a*]pyrazine-4,7-dione [Chloroethylgelastatin A (CEAA)] (8) and (5a*S*,5b*S*,8a*S*,9a*R*)-1,2-Dichloro-8-ethyl-8a-hydroxy-5,5a,5b,6,8,8a,9,9a-octahydroimidazo[4',5':4,5]cyclopenta[1,2-*e*]pyrrolo[1,2-*a*]pyrazine-4,7-dione [Dichloroethylgelastatin A (DCEAA)] (9):** To a stirred solution of debromoethylgelastatin A (DeBEAA) (6) (36 mg, 0.130 mmol) in THF-MeOH (24.6 mL; 2:1 v/v) in a dry ice/acetone cooling bath (-78 °C) were added 2,6-di-*tert*-butylpyridine (DTBP) (44 μL; 0.195 mmol) and dichlorodimethylhydantoin (DCDMH) (25.6 mg in THF-MeOH 500 μL; 2:1 v/v, 0.130 mmol). Following removal of the dry ice/acetone bath, stirring was continued for 45 min at room temperature. The mixture was quenched with Et<sub>3</sub>N (181 μL; 1.30 mmol) and 2-methyl-2-butene (138 μL; 1.30 mmol), and concentrated under reduced pressure. The residue was purified by flash silica gel column chromatography (MeOH/CH<sub>2</sub>Cl<sub>2</sub> 1:15 v/v) to give chloroethylgelastatin A (CEAA) (8) (18.3 mg, 45%) as a colorless solid and dichloroethylgelastatin A (DCEAA) (9) (6.7 mg, 15%) as a colorless solid.

**Chloroethylgelastatin A (CEAA) (8):** [ $\alpha$ ]<sub>D</sub><sup>25</sup> -59.6 (*c* 0.355, MeOH); IR (KBr)  $\nu$  3265, 1664 cm<sup>-1</sup>; <sup>1</sup>H NMR (400 MHz, CD<sub>3</sub>OD)  $\delta$  6.89 (d, 1H, *J* = 4.3 Hz), 6.23 (d, 1H, *J* = 4.3 Hz), 4.65 (ddd, 1H, *J* = 12.2, 6.1, 4.9 Hz), 4.07 (d, 1H, *J* = 4.9 Hz), 3.84 (s, 1H), 3.37-3.23 (m, 2H), 2.62 (dd, 1H, *J* = 12.8, 6.1 Hz), 2.18 (dd, 1H, *J* = 12.8, 12.2 Hz), 1.27 (t, 3H, *J* = 7.3 Hz); <sup>13</sup>C NMR (125 MHz, CD<sub>3</sub>OD)  $\delta$  161.4, 161.1, 122.5, 120.6, 115.3, 110.0, 96.1, 67.5, 62.4, 53.0, 41.0, 34.9, 15.9; MS *m/z*: 311 [M+1]<sup>+</sup>, 93 (100%); HRMS (FAB) calcd for C<sub>13</sub>H<sub>16</sub>ClN<sub>4</sub>O<sub>3</sub> [M+H]<sup>+</sup>: 311.0911, found: 311.0905.

**Dichloroethylgelastatin A (DCEAA) (9):** [ $\alpha$ ]<sub>D</sub><sup>25</sup> -47.2 (*c* 0.445, MeOH); IR (KBr)  $\nu$  3352, 1653 cm<sup>-1</sup>; <sup>1</sup>H NMR (400 MHz, CD<sub>3</sub>OD)  $\delta$  6.87 (s, 1H), 4.64 (ddd, 1H, *J* = 12.4, 6.0, 5.6 Hz), 4.10 (d, 1H, *J* =

5.6 Hz), 3.83 (s, 1H), 3.36-3.23 (m, 2H), 2.64 (dd, 1H,  $J = 12.8, 6.0$  Hz), 2.19 (dd, 1H,  $J = 12.8, 12.4$  Hz), 1.27 (t, 3H,  $J = 6.8$  Hz);  $^{13}\text{C}$  NMR (100 MHz,  $\text{CD}_3\text{OD}$ )  $\delta$  161.4, 160.0, 121.7, 117.7, 113.8, 112.8, 96.0, 67.5, 62.2, 53.6, 40.9, 34.9, 15.9; MS  $m/z$ : 345  $[\text{M}+1]^+$ , 93 (100%); HRMS (FAB) calcd for  $\text{C}_{13}\text{H}_{15}\text{Cl}_2\text{N}_4\text{O}_3$   $[\text{M}+\text{H}]^+$ : 345.0521, found: 345.0527.

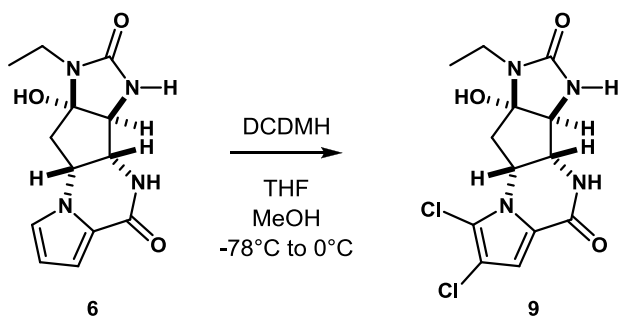

**(5a*S*,5b*S*,8a*S*,9a*R*)-1,2-Dichloro-8-ethyl-8a-hydroxy-5,5a,5b,6,8,8a,9,9a-octahydroimidazo[4',5':4,5]cyclopenta[1,2-*e*]pyrrolo[1,2-*a*]pyrazine-4,7-dione**

**[Dichloroethylagelastatin A (DCEAA)] (9):** To a stirred solution of debromoethylagelastatin A (DeBEAA) (**6**) (15 mg, 0.0543 mmol) in THF-MeOH (10.5 mL; 2:1 v/v) was added dichlorodimethylhydantoin (DCDMH) (10.7 mg in THF-MeOH 100  $\mu\text{L}$ ; 2:1 v/v, 0.0543 mmol) at  $-78^\circ\text{C}$ , and the whole mixture was warmed to  $0^\circ\text{C}$ . After 40 min of stirring, the mixture was again cooled to  $-78^\circ\text{C}$ , and DCDMH (8.6 mg in THF-MeOH 100  $\mu\text{L}$ ; 2:1 v/v, 0.0437 mmol) was added. Stirring was continued for additional 30 min at  $0^\circ\text{C}$ . Following quenching with  $\text{Et}_3\text{N}$  (76  $\mu\text{L}$ ; 0.543 mmol) and 2-methyl-2-butene (58  $\mu\text{L}$ ; 0.0543 mmol), the mixture was concentrated under reduced pressure. The residue was purified by flash silica gel column chromatography (MeOH/ $\text{CH}_2\text{Cl}_2$  1:12 v/v) to give dichloroethylagelastatin A (DCEAA) (**9**) (10.5 mg, 56%) as a colorless solid.

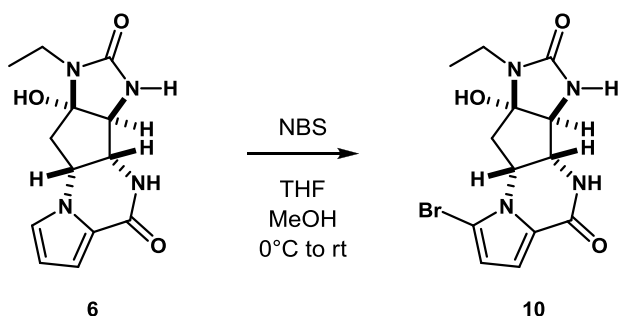



**(5a*S*,5b*S*,8a*S*,9a*R*)-1-Bromo-8-ethyl-8a-hydroxy-5,5a,5b,6,8,8a,9,9a-octahydroimidazo[4',5':4,5]cyclopenta[1,2-*e*]pyrrolo[1,2-*a*]pyrazine-4,7-dione**

**[Ethylagelastatin A (EAA)] (10):** To a solution of debromoethylagelastatin A (DeBEAA) (**6**) (2.5 mg, 0.009 mmol) in THF-MeOH (1.5 mL; 2:1 v/v) was added NBS (1 mg in THF-MeOH 100  $\mu$ L; 2:1 v/v, 0.005 mmol) at 0 °C, and the mixture was allowed to warm to room temperature. After being stirred for 50 min, the mixture was again cooled to 0 °C, and NBS (0.32 mg in THF-MeOH 100  $\mu$ L; 2:1 v/v, 0.0018 mmol) was added. After stirring for additional 1 h at room temperature, the mixture was concentrated under reduced pressure. The residue was purified by flash silica gel column chromatography (MeOH/CH<sub>2</sub>Cl<sub>2</sub> 1:10) to give ethylagelastatin A (EAA) (**10**) (2.1 mg, 65%) as a colorless solid. **Ethylagelastatin A (EAA) (10):**  $[\alpha]_D^{25}$  -38.2 (*c* 0.055, MeOH); IR (KBr)  $\nu$  3381, 3069, 1655 cm<sup>-1</sup>; <sup>1</sup>H NMR (400 MHz, CD<sub>3</sub>OD)  $\delta$  6.90 (d, 1H, *J* = 4.1 Hz), 6.33 (dd, 1H, *J* = 4.1 Hz), 4.63 (ddd, 1H, *J* = 11.9, 6.0, 6.0 Hz), 4.08 (d, 1H, *J* = 5.5 Hz), 3.84 (s, 1H), 3.37-3.24 (m, 2H), 2.63 (dd, 1H, *J* = 12.8, 6.4 Hz), 2.16 (dd, 1H, *J* = 12.8, 10.0 Hz), 1.30 (t, 3H, *J* = 6.9 Hz); <sup>13</sup>C NMR (100 MHz, CD<sub>3</sub>OD)  $\delta$  161.5, 161.0, 124.2, 116.0, 113.8, 107.2, 96.0, 67.5, 62.3, 54.3, 41.1, 34.9, 16.0; MS *m/z*: 355 [M+1]<sup>+</sup>, 93 (100%); HRMS (FAB) calcd for C<sub>13</sub>H<sub>16</sub>BrN<sub>4</sub>O<sub>3</sub> [M+H]<sup>+</sup>: 355.0406, found: 355.0423.

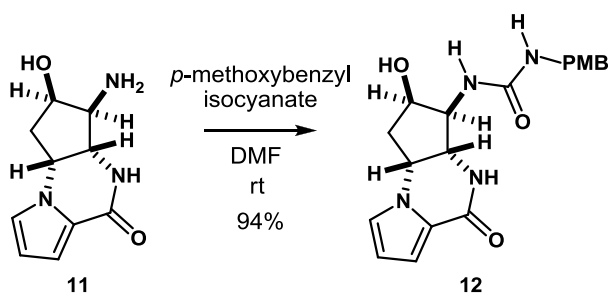

**1-((2*R*,3*S*,3a*S*,9a*R*)-2-Hydroxy-5-oxo-2,3,3a,4,5,9a-hexahydro-1*H*-**

**cyclopenta[*e*]pyrrolo[1,2-*a*]pyrazin-3-yl)-3-(4-methoxybenzyl)urea [Urea (**12**)]:** To a solution of  $\beta$ -aminoalcohol **11** (9 mg, 0.0403 mmol) in DMF (1 mL) was added *p*-methoxybenzyl isocyanate (6.3  $\mu$ L, 0.0443 mmol). After stirring for 80 min at room temperature, the mixture was concentrated under reduced pressure to give a sufficiently pure urea **12** (14.1 mg, 94%) as a colorless solid. **Urea 12:** IR (KBr)  $\nu$  3285, 1636 cm<sup>-1</sup>; <sup>1</sup>H NMR (500 MHz, DMSO-*d*<sub>6</sub>)  $\delta$  7.72 (d, 1H, *J* = 3.4 Hz), 7.16 (d, 2H, *J* = 8.6 Hz), 7.04

(dd, 1H,  $J = 2.3, 1.7$  Hz), 6.86 (d, 2H,  $J = 8.6$  Hz), 6.69 (dd, 1H,  $J = 6.3, 5.7$  Hz), 6.61 (dd, 1H,  $J = 4.0, 1.7$  Hz), 6.18 (dd, 1H,  $J = 3.4, 2.2$  Hz), 5.93 (d, 1H,  $J = 8.0$  Hz), 5.32 (d, 1H,  $J = 4.6$  Hz), 4.57 (m, 1H), 4.16-4.09 (m, 2H), 3.97 (m, 1H), 3.83-3.73 (m, 2H), 3.71 (s, 3H), 2.42 (ddd, 1H,  $J = 14.9, 6.3, 4.0$  Hz), 2.22 (ddd, 1H,  $J = 14.3, 7.4, 2.3$  Hz);  $^{13}\text{C}$  NMR (125 MHz, DMSO- $d_6$ )  $\delta$  158.04, 157.69, 132.49, 128.47, 123.39, 122.44, 113.63, 111.84, 109.50, 67.37, 58.60, 57.42, 55.05, 51.39, 42.41; MS  $m/z$ : 371  $[\text{M}+1]^+$ , 93 (100%); HRMS (FAB) calcd for  $\text{C}_{19}\text{H}_{23}\text{N}_4\text{O}_4$   $[\text{M}+\text{H}]^+$ : 371.1719, found: 371.1728.

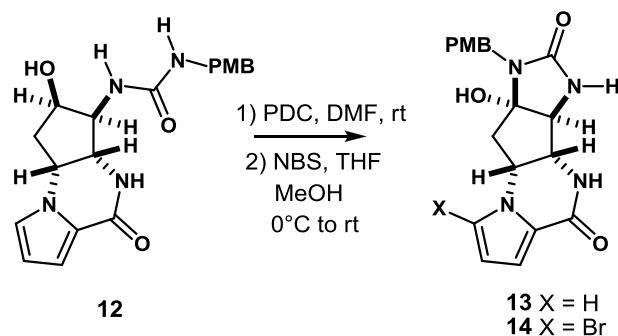

**(5a*S*,5b*S*,8a*S*,9a*R*)-8a-Hydroxy-8-(4-methoxybenzyl)-5,5a,5b,6,8,8a,9,9a-octahydroimidazo[4',5':4,5]cyclopenta[1,2-*e*]pyrrolo[1,2-*a*]pyrazine-4,7-dione**

**[Hemiaminal (13)]:** To a stirred solution of urea **12** (10 mg, 0.027 mmol) in DMF (1 mL) at room temperature was added pyridinium dichromate (PDC) (30.5 mg, 0.081 mmol), and the mixture was stirred at room temperature. After 28 h, *i*-PrOH (6.2  $\mu\text{L}$ ) was added, and the mixture was stirred for additional 10 min and concentrated under reduced pressure. The residue was charged onto a column of flash silica gel/florisil (slurry packed) and eluted with MeOH/ $\text{CH}_2\text{Cl}_2$  (1:15 v/v) to give hemiaminal **13** (3 mg, 30%) as a pale yellow solid. **Hemiaminal 13:** pale yellow solid;  $[\alpha]_D^{25} -7.0$  ( $c$  0.165, MeOH); IR (KBr)  $\nu$  3457, 1633  $\text{cm}^{-1}$ ;  $^1\text{H}$  NMR (400 MHz,  $\text{CD}_3\text{OD}$ )  $\delta$  7.34 (d, 2H,  $J = 8.7$  Hz), 6.93 (d, 2H,  $J = 8.7$  Hz), 6.81 (dd, 1H,  $J = 3.8, 1.4$  Hz), 6.50 (dd, 1H  $J = 2.3, 1.8$  Hz), 6.15 (dd, 1H,  $J = 3.8, 2.3$  Hz), 4.64 (d, 1H,  $J = 15.6$  Hz), 4.40 (m, 1H), 4.20 (d, 1H,  $J = 15.6$  Hz), 3.96 (dd, 1H,  $J = 5.0, 1.4$  Hz), 3.81-3.76 (m, 4H), 2.18-2.10 (m, 2H);  $^{13}\text{C}$  NMR (100 MHz,  $\text{CD}_3\text{OD}$ )  $\delta$  161.87, 161.57, 160.67, 132.67, 130.29, 124.94, 122.84, 115.29, 115.01, 111.11, 95.83, 68.08, 62.83, 55.77, 55.38, 42.43, 42.26; MS  $m/z$ : 369  $[\text{M}+1]^+$ , 93 (100%); HRMS (FAB) calcd for  $\text{C}_{19}\text{H}_{21}\text{N}_4\text{O}_4$   $[\text{M}+\text{H}]^+$ : 369.1563, found: 369.1549.

**(5a*S*,5b*S*,8a*S*,9a*R*)-1-Bromo-8a-hydroxy-8-(4-methoxybenzyl)-5,5a,5b,6,8,8a,9,9a-octahydroimidazo[4',5':4,5]cyclopenta[1,2-*e*]pyrrolo[1,2-*a*]pyrazine-4,7-dione** [*N-p*-methoxybenzylagelastatin A (*N*-PMBAA)] (**14**): To a solution of hemiaminal **13** (1.6 mg, 0.004 mmol) in THF-MeOH (0.75 mL; 2:1 v/v) was added NBS (0.386 mg in THF-MeOH 100  $\mu$ L; 2:1 v/v, 0.0022 mmol) at 0  $^{\circ}$ C, and the mixture was allowed to warm to room temperature. After being stirred for 15 min, the mixture was again cooled to 0  $^{\circ}$ C, and NBS (0.386 mg in THF-MeOH 100  $\mu$ L; 2:1 v/v, 0.0022 mmol) was added. After stirring for additional 45 min at room temperature, the mixture was concentrated under reduced pressure. The residue was purified by flash silica gel column chromatography (MeOH/EtOAc/H<sub>2</sub>O 1:80:1 v/v/v) to give *N-p*-methoxybenzyl agelastatin A (*N*-PMBAA) (**14**) (1.7 mg, 88%) as a colorless solid. *N-p*-methoxybenzylagelastatin A (*N*-PMBAA) (**14**): colorless solid;  $[\alpha]_D^{25}$  -5.8 (*c* 0.05, MeOH); IR (KBr) 3340, 1651  $\text{cm}^{-1}$ ; <sup>1</sup>H NMR (400 MHz, CD<sub>3</sub>OD)  $\delta$  7.36 (d, 2H, *J* = 8.0 Hz), 6.90 (d, 2H, *J* = 8.0 Hz), 6.82 (dd, 1H, *J* = 4.0, Hz), 6.18 (d, 1H *J* = 4.0 Hz), 4.66 (d, 1H, *J* = 15.6 Hz), 4.40 (ddd, 1H, *J* = 11.6, 6.0, 5.6 Hz), 4.15 (d, 1H, *J* = 15.6 Hz), 4.05 (d, 1H, *J* = 5.6 Hz), 3.87 (s, 1H), 3.77 (s, 3H), 2.35 (dd, 1H, *J* = 12.8, 5.6 Hz), 1.93 (dd, 1H, *J* = 12.8, 12.4 Hz); <sup>13</sup>C NMR (100 MHz, CD<sub>3</sub>OD)  $\delta$  161.84, 160.98, 160.61, 133.00, 130.40, 124.01, 115.88, 115.44, 113.52, 107.08, 95.91, 67.77, 62.08, 55.78, 54.12, 42.14, 40.87; MS *m/z*: 447 [M+1]<sup>+</sup>, 93 (100%); HRMS (FAB) calcd for C<sub>19</sub>H<sub>20</sub>BrN<sub>4</sub>O<sub>4</sub> [M+H]<sup>+</sup>: 447.0668, found: 447.0667.

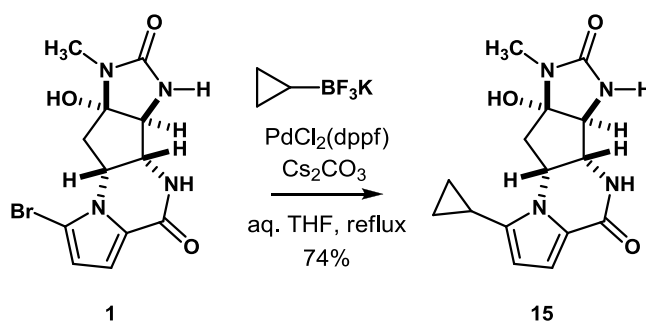

**(5a*S*,5b*S*,8a*S*,9a*R*)-1-Cyclopropyl-8a-hydroxy-8-methyl-5,5a,5b,6,8,8a,9,9a-octahydroimidazo[4',5':4,5]cyclopenta[1,2-*e*]pyrrolo[1,2-*a*]pyrazine-4,7-dione** [Cyclopropylagelastatin (CPAA)] (**15**): To a stirred solution of agelastatin A (**1**) (14.8 mg, 0.0434 mmol) in THF-H<sub>2</sub>O (4 mL; 3:1 v/v) were added potassium cyclopropyl trifluoroborate (7.4 mg, 0.0521 mmol), Cs<sub>2</sub>CO<sub>3</sub> (46.7 mg, 0.143 mmol), and PdCl<sub>2</sub>(dppf)

(17.7 mg, 0.0217 mmol). After stirring at 100 °C for 24 h, the mixture was cooled to room temperature and additional amounts of potassium cyclopropyl trifluoroborate (7.4 mg, 0.0521 mmol) and PdCl<sub>2</sub>(dppf) (17.7 mg, 0.0217 mmol) were added. After stirring for additional 12 h at 100 °C, the whole mixture was cooled to room temperature and transferred to a separatory funnel where it was partitioned between CH<sub>2</sub>Cl<sub>2</sub> and H<sub>2</sub>O. The aqueous layer was separated and concentrated. The residue was purified by flash silica gel column chromatography (MeOH/CH<sub>2</sub>Cl<sub>2</sub> 1:7) to give cyclopropylagelastatin A (CPAA) (**15**) (9.7 mg, 74%) as a colorless solid. **Cyclopropylagelastatin (CPAA) (15)**: colorless solid; [α]<sub>D</sub><sup>25</sup> -43.3 (*c* 0.065, MeOH); IR (KBr) ν 3383, 1633 cm<sup>-1</sup>; <sup>1</sup>H NMR (400 MHz, CD<sub>3</sub>OD) δ 6.79 (d, 1H, *J* = 4.0 Hz), 5.86 (d, 1H, *J* = 4.0 Hz), 4.74 (ddd, 1H, *J* = 11.6, 6.4, 6.0 Hz), 4.04 (d, 1H, *J* = 5.2 Hz), 3.86 (s, 1H), 2.80 (s, 3H), 2.69 (dd, 1H, *J* = 13.2, 6.4 Hz), 2.12 (dd, 1H, *J* = 12.8, 12.4 Hz), 1.81 (m, 1H), 0.96-0.92 (m, 2H), 0.70 (m, 1H), 0.60 (m, 1H); <sup>13</sup>C NMR (100 MHz, CD<sub>3</sub>OD) δ 162.10, 161.51, 141.04, 121.88, 115.23, 107.50, 95.90, 67.53, 62.48, 52.99, 40.34, 24.20, 7.39, 7.19, 6.31; MS *m/z*: 303 [M+1]<sup>+</sup>, 93 (100%); HRMS (FAB) calcd for C<sub>15</sub>H<sub>19</sub>N<sub>4</sub>O<sub>3</sub> [M+H]<sup>+</sup>: 303.1457, found: 303.1482.

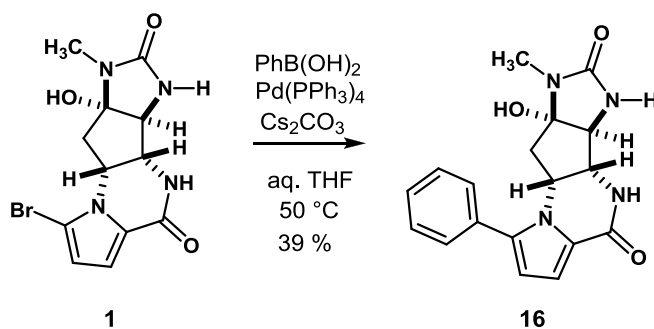

**(5a*S*,5b*S*,8a*S*,9a*R*)-8a-Hydroxy-8-methyl-1-phenyl-5,5a,5b,6,8,8a,9,9a-octahydroimidazo[4',5':4,5]cyclopenta[1,2-*e*]pyrrolo[1,2-*a*]pyrazine-4,7-dione**

**[Phenylagelastatin A (PAA)] (16)**: To a stirred solution of agelastatin A (**1**) (19.2 mg, 0.0563 mmol) in THF-H<sub>2</sub>O (2 mL; 1:1 v/v) were added phenylboronic acid (20.6 mg, 0.169 mmol), Cs<sub>2</sub>CO<sub>3</sub> (91.7 mg, 0.282 mmol), and Pd(PPh<sub>3</sub>)<sub>4</sub> (19.5 mg, 0.0169 mmol). After stirring at 50 °C for 40 min, the mixture was cooled to room temperature and transferred to a separatory funnel where it was partitioned between CH<sub>2</sub>Cl<sub>2</sub> and H<sub>2</sub>O. The

aqueous layer was separated and concentrated. The residue was purified by flash silica gel column chromatography (MeOH/CH<sub>2</sub>Cl<sub>2</sub> 1:8) to give phenylagelastatin A (PAA) (**16**) (7.4 mg, 39%) as a colorless solid. **Phenylagelastatin A (PAA) (16)**:  $[\alpha]_D^{24} -82.5$  (*c* 0.225, MeOH); IR (KBr)  $\nu$  3198, 1680 cm<sup>-1</sup>; <sup>1</sup>H NMR (400 MHz, CD<sub>3</sub>OD)  $\delta$  7.51-7.38 (m, 5H), 6.99 (d, 1H, *J* = 4.1 Hz), 6.32 (d, 1H, *J* = 4.1 Hz), 4.52 (ddd, 1H, *J* = 11.5, 6.0, 5.5 Hz), 4.05 (d, 1H, *J* = 5.0 Hz), 3.83 (s, 1H), 2.58 (s, 3H), 2.38 (dd, 1H, *J* = 13.2, 6.4 Hz), 2.19 (dd, 1H, *J* = 12.8, 12.4 Hz); <sup>13</sup>C NMR (125 MHz, CD<sub>3</sub>OD)  $\delta$  162.13, 161.38, 139.28, 132.76, 129.96, 129.86, 129.68, 123.56, 115.98, 111.76, 95.41, 67.21, 62.43, 53.85, 40.82, 23.97; MS *m/z*: 339 [M+1]<sup>+</sup>, 93 (100%); HRMS (FAB) calcd for C<sub>18</sub>H<sub>19</sub>N<sub>4</sub>O<sub>3</sub> [M+H]<sup>+</sup>: 339.1457, found: 339.1447.

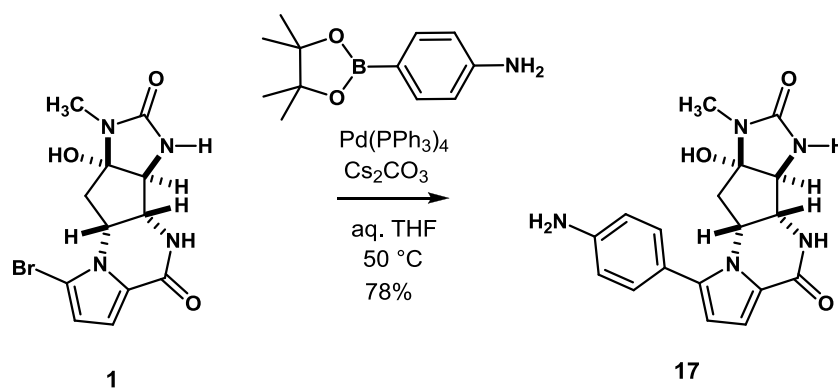

**(5a*S*,5b*S*,8a*S*,9a*R*)-1-(4-Aminophenyl)-8a-hydroxy-8-methyl-5,5a,5b,6,8,8a,9,9a-octahydroimidazo[4',5':4,5]cyclopenta[1,2-*e*]pyrrolo[1,2-*a*]pyrazine-4,7-dione**

**[Aminophenylagelastatin A (APAA)] (17)**: To a stirred solution of agelastatin A (**1**) (8.7 mg, 0.0255 mmol) in THF-H<sub>2</sub>O (2 mL; 1:1 v/v) were added *p*-aminophenylboronic acid (6.1 mg, 0.0281 mmol), Cs<sub>2</sub>CO<sub>3</sub> (41.5 mg, 0.128 mmol), and Pd(PPh<sub>3</sub>)<sub>4</sub> (8.8 mg, 0.0077 mmol). After stirring at 50 °C for 1 h, the mixture was cooled to room temperature and concentrated under reduced pressure. The residue was purified by flash silica gel column chromatography (MeOH/CH<sub>2</sub>Cl<sub>2</sub> 1:20) to give *p*-aminophenylagelastatin A (APAA) (**17**) (7 mg, 78%) as a pale yellow solid. **Aminophenylagelastatin A (APAA) (17)**:  $[\alpha]_D^{25} -45.6$  (*c* 0.05, MeOH); IR (KBr)  $\nu$  3288, 1647 cm<sup>-1</sup>; <sup>1</sup>H NMR (500 MHz, CD<sub>3</sub>OD)  $\delta$  7.15 (d, 2H, *J* = 8.5 Hz), 6.94 (d, 1H, *J* = 4.5 Hz), 6.76 (d, 2H, *J* = 8.5 Hz), 6.18 (d, 1H, *J* = 4.5 Hz), 4.50 (ddd, 1H, *J* = 11.5, 6.0, 5.5 Hz), 4.01 (d, 1H, *J* = 4.5 Hz), 3.82 (s, 1H), 2.62

(s, 3H), 2.39 (dd, 1H,  $J = 12.5, 6.0$  Hz), 2.17 (dd, 1H,  $J = 13.0, 12.5$  Hz);  $^{13}\text{C}$  NMR (125 MHz,  $\text{CD}_3\text{OD}$ )  $\delta$  162.31, 161.42, 149.89, 140.34, 130.74, 122.50, 121.34, 116.08, 116.05, 110.91, 95.45, 67.16, 62.45, 53.67, 40.79, 24.04; MS  $m/z$ : 354  $[\text{M}+1]^+$ , 93 (100%); HRMS (FAB) calcd for  $\text{C}_{18}\text{H}_{20}\text{N}_5\text{O}_3$   $[\text{M}+\text{H}]^+$ : 354.1566, found: 354.1570.

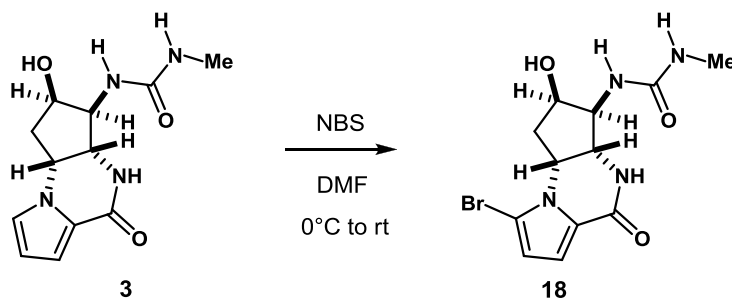

**1-((2R,3S,3aS,9aR)-8-Bromo-2-hydroxy-5-oxo-2,3,3a,4,5,9a-hexahydro-1H-cyclopenta[e]pyrrolo[1,2-a]pyrazin-3-yl)-3-methylurea [Urea agelastatin A (UAA)]**

**(18):** To a solution of urea **3** (20 mg, 0.0757 mmol) in DMF (1 mL) at 0 °C was added NBS (13.5 mg, 0.0757 mmol). After stirring for 40 min at room temperature, the mixture was concentrated under reduced pressure. The residue was rinsed with EtOAc to leave sufficiently pure urea agelastatin A (UAA) (**18**) (25.4 mg, 97%) as a colorless solid.

**Urea agelastatin A (UAA) (18):**  $[\alpha]_{\text{D}}^{25} -26.3$  ( $c$  0.245, MeOH); colorless solid; IR (KBr)  $\nu$  3310, 1618  $\text{cm}^{-1}$ ;  $^1\text{H}$  NMR (500 MHz,  $\text{CD}_3\text{OD}$ )  $\delta$  6.82 (d, 1H,  $J = 4.3$  Hz), 6.27 (d, 1H,  $J = 4.3$  Hz), 4.93 (dt, 1H,  $J = 10.4, 7.3$  Hz), 4.34 (ddd, 1H,  $J = 5.5, 4.9, 1.8$  Hz), 4.08-4.02 (m, 2H), 2.67 (s, 3H), 2.44 (ddd, 1H,  $J = 13.4, 7.3, 1.8$  Hz), 1.91 (ddd, 1H,  $J = 13.4, 10.4, 5.5$  Hz);  $^{13}\text{C}$  NMR (100 MHz,  $\text{CD}_3\text{OD}$ )  $\delta$  161.79, 160.15, 123.82, 115.38, 113.88, 106.93, 69.80, 62.66, 61.11, 53.78, 41.12, 26.88; MS  $m/z$ : 343  $[\text{M}+1]^+$ , 93 (100%); HRMS (FAB) calcd for  $\text{C}_{12}\text{H}_{16}\text{BrN}_4\text{O}_3$   $[\text{M}+\text{H}]^+$ : 343.0406, found: 343.0412.

**Cell proliferation assay of AA and AA analogues:**

1) *Raji cells and MDA-MB-132 cells* were purchased from American Tissue Culture (Manassas, VA). They were maintained in RPMI-1640 media with L-glutamine and supplemented with 10% (v/v) FBS and 1% (v/v) penicillin-streptomycin. Raji cells or MDA-MB-132 were seeded in triplicate at 50,000 cells per mL per well of a 24-well tissue culture plate in 0.5 mL of media. The next day, the cells were treated with vehicle

control or a drug (AA or one of its 18 analogues) at 18.75, 37.5, 75, 150, 300, 600, 1200, 2400, 5000, or 10,000 nM. Cells were harvested and counted on the third day in a Coulter Particle Counter (Beckman-Coulter Corp.:Brea, CA). IC<sub>50</sub> values were calculated using GraphPad Prism 5 (GraphPad Software Inc., La Jolla, CA).

2) *Human DU145 prostate cancer cells* were cultured in RPMI 1640 supplemented with heat-inactivated 10% FBS and kanamycin (50 µg/mL) in a humidified atmosphere of 5% CO<sub>2</sub> at 37 °C. The cell suspension in the culture medium was plated into each well of 96-well plates (10,000 cells/well/100 µL). After 24 h, testing compounds were added, and then the plates were incubated for an additional 24 h in a humidified atmosphere of 5 % CO<sub>2</sub> at 37 °C. The cell proliferation was detected according to an established MTT method, as previously described.<sup>2</sup> The IC<sub>50</sub> value was determined by linear interpolation from the growth inhibition curve.

### **Chemoinformatic analysis:**

**Methods and materials:** All AA analogues were analyzed for chemoinformatic properties and physical descriptors. Chemoinformatic properties for AA analogues were then compared with a pool of commercial drugs (>1712 different drug molecules) and ranked based on chemoinformatic statistics that fall within the range formed from greater than 95% of commercial drugs. The analyses examined a broad range of chemoinformatic descriptors with an emphasis on log BB, but other contributing factors were weighted as well. All initial structures were derived in ChemDraw and optimized using ChemBio 3D and GAMESS for optimization of the structure at both RHF/3-21G level of theory and PM6, R-closed shell, PCM solvent for semi-empirical optimization.<sup>3-5</sup> The root mean square deviation (r.m.s.d.) difference between the all optimized structures was <0.05 Angstroms. The optimized structures were imported into Schrodinger's Maestro (MAE format) module for chemical profiling with QikProp.<sup>6</sup> Additionally, we conducted a similarity comparison against the most common pharmaceutical drugs, screening for top drugs with the most similar physical descriptors to each AA analogue. Such a comparison does not preclude a common activity, but does indicate the likelihood of drug-like ability for these AA analogues. Additional considerations for optimal chemoinformatic

behaviour of CNS penetration were investigated, in part with novel algorithmic approaches, per the literature.<sup>3-5</sup>

**Table S1.** Chemoinformatic analyses of CAA (**7**) with Schrödinger's QikProp. Resulting statistical data were generated on a QM optimized version of CAA (**7**).

| <b>Principal Descriptors:</b>         |                                    | <b>(Range 95% of Drugs)</b> |                            |
|---------------------------------------|------------------------------------|-----------------------------|----------------------------|
| Solute                                | molecular weight                   | 296.713                     | (130.0/725.0)              |
| Solute                                | dipole moment (D)                  | 3.125                       | (1.0/12.5)                 |
| Solute                                | total SASA                         | 460.284                     | (300.0/1000.0)             |
| Solute                                | hydrophobic SASA                   | 136.270                     | (0.0/750.0)                |
| Solute                                | hydrophilic SASA                   | 159.482                     | (7.0/330.0)                |
| Solute                                | carbon Pi SASA                     | 95.619                      | (0.0/ 450.0)               |
| Solute                                | weakly polar SASA                  | 68.913                      | (0.0/175.0)                |
| Solute                                | molecular volume (Å <sup>3</sup> ) | 791.990                     | (500.0/2000.0)             |
| Solute                                | vdW polar SA (PSA)                 | 99.131                      | (7.0/200.0)                |
| Solute                                | no. of rotatable bonds             | 1.000                       | (0.0/15.0)                 |
| Solute as donor                       | -hydrogen bonds                    | 3.000                       | (0.0/6.0)                  |
| Solute as acceptor                    | -hydrogen bonds                    | 5.250                       | (2.0/20.0)                 |
| Solute globularity                    | (sphere = 1)                       | 0.899                       | (0.75/0.95)                |
| Solute ionization potential           | (eV)                               | 8.906                       | (7.9/10.5)                 |
| Solute electron affinity              | (eV)                               | -0.157                      | (-0.9/1.7)                 |
| <b>Predictions for properties:</b>    |                                    | <b>(Range 95% of drugs)</b> |                            |
| QP polarizability (Å <sup>3</sup> )   |                                    | 25.813M                     | (13.0/70.0)                |
| QP log P for hexadecane-gas           |                                    | 8.701M                      | (4.0/18.0)                 |
| QP log P for octanol-gas              |                                    | 16.070M                     | (8.0/35.0)                 |
| QP log P for water-gas                |                                    | 11.931M                     | (4.0/45.0)                 |
| QP log P for octanol-water            |                                    | 1.153                       | (-2.0/6.5)                 |
| QP log S for aqueous solubility       |                                    | -3.098                      | (-6.5/0.5)                 |
| QP log S- conformation-independent    |                                    | -3.648                      | (-6.5/0.5)                 |
| QP log K hsa serum protein binding    |                                    | -0.227                      | (-1.5/1.5)                 |
| QP log BB for brain-blood             |                                    | -0.642                      | (-3.0/1.2)                 |
| No. of primary metabolites            |                                    | 1                           | (1.0/8.0)                  |
| HERG K+ channel blockage: log IC50    |                                    | -3.616                      | (<-5 poor)                 |
| Apparent Caco-2 permeability (nm/sec) |                                    | 304                         | (<25 poor, >500 excellent) |
| Apparent MDCK permeability (nm/sec)   |                                    | 326                         | (<25 poor, >500 excellent) |
| QP log Kp for skin permeability       |                                    | -4.026                      | (Kp in cm/hr)              |
| Jm, max transdermal transport rate    |                                    | 0.022                       | (µg/cm <sup>2</sup> hr)    |
| Lipinski's rule of 5 violations       |                                    | 0                           | (maximum is 4)             |
| Jorgensen's rule of 3 violations      |                                    | 0                           | (maximum is 3)             |

**QP Breakdown (< for descriptor over training max)**

| <b>log Po/w:</b>             |        | <b>-log S:</b>               |        |
|------------------------------|--------|------------------------------|--------|
| H-bond donor                 | -0.900 | H-bond donor                 | -1.205 |
| H-bond acceptor              | -2.557 | H-bond acceptor              | -2.749 |
| Volume                       | 5.167  | SASA                         | 8.722  |
| Ac x Dn <sup>0.5</sup> /SASA | 0.876  | Ac x Dn <sup>0.5</sup> /SASA | 1.975  |
| FISA                         | -1.104 | Rotor bonds                  | -0.163 |
| Non-con amines               | 0.000  | N protonation                | 0.000  |
| Non-con amides               | 0.000  | Non-con amides               | 0.000  |
| WPSA and PISA                | 0.375  | WPSA                         | 0.300  |
| Constant                     | -0.705 | Constant                     | -3.783 |



|                  |               |       |       |
|------------------|---------------|-------|-------|
| Total            | 1.153         | Total | 3.098 |
| <b>log BB:</b>   |               |       |       |
| Hydrophilic SASA | -1.314        |       |       |
| WPSA             | 0.169         |       |       |
| Rotor bonds      | -0.060        |       |       |
| N protonation    | 0.000         |       |       |
| FOSA             | 0.000         |       |       |
| Constant         | 0.564         |       |       |
| <u>Total</u>     | <u>-0.642</u> |       |       |

**Table S2.** Chemoinformatic analyses of CEAA (**8**) with Schrödinger's QikProp. Resulting statistical data were generated on a QM optimized version of CEAA (**8**).

| <b>Principal Descriptors:</b>         |                                    | <b>(Range 95% of Drugs)</b> |                            |
|---------------------------------------|------------------------------------|-----------------------------|----------------------------|
| Solute                                | molecular weight                   | 310.739                     | (130.0/725.0)              |
| Solute                                | dipole moment (D)                  | 3.015                       | (1.0/12.5)                 |
| Solute                                | total SASA                         | 483.566                     | (300.0/1000.0)             |
| Solute                                | hydrophobic SASA                   | 173.830                     | (0.0/750.0)                |
| Solute                                | hydrophilic SASA                   | 145.205                     | (7.0/330.0)                |
| Solute                                | carbon Pi SASA                     | 95.619                      | (0.0/450.0)                |
| Solute                                | weakly polar SASA                  | 68.912                      | (0.0/175.0)                |
| Solute                                | molecular volume (Å <sup>3</sup> ) | 844.677                     | (500.0/2000.0)             |
| Solute                                | vdW polar SA (PSA)                 | 95.795                      | (7.0/200.0)                |
| Solute                                | no. of rotatable bonds             | 2.000                       | (0.0/15.0)                 |
| Solute as donor                       | -hydrogen bonds                    | 3.000                       | (0.0/6.0)                  |
| Solute as acceptor                    | -hydrogen bonds                    | 5.250                       | (2.0/20.0)                 |
| Solute globularity (sphere = 1)       |                                    | 0.894                       | (0.75/0.95)                |
| Solute ionization potential (eV)      |                                    | 8.902                       | (7.9/10.5)                 |
| Solute electron affinity (eV)         |                                    | -0.163                      | (-0.9/1.7)                 |
| <b>Predictions for properties:</b>    |                                    | <b>(Range 95% of drugs)</b> |                            |
| QP polarizability (Å <sup>3</sup> )   |                                    | 27.279M                     | (13.0/70.0)                |
| QP log P for hexadecane-gas           |                                    | 9.077M                      | (4.0/18.0)                 |
| QP log P for octanol-gas              |                                    | 16.455M                     | (8.0/35.0)                 |
| QP log P for water-gas                |                                    | 11.669M                     | (4.0/45.0)                 |
| QP log P for octanol-water            |                                    | 1.553                       | (-2.0/6.5)                 |
| QP log S for aqueous solubility       |                                    | -3.282                      | (-6.5/0.5)                 |
| QP log S- conformation-independent    |                                    | -3.912                      | (-6.5/0.5)                 |
| QP log K hsa serum protein binding    |                                    | -0.158                      | (-1.5/1.5)                 |
| QP log BB for brain-blood             |                                    | -0.600                      | (-3.0/1.2)                 |
| No. of primary metabolites            |                                    | 1                           | (1.0/8.0)                  |
| HERG K+ channel blockage: log IC50    |                                    | -3.709                      | (<-5 poor)                 |
| Apparent Caco-2 permeability (nm/sec) |                                    | 415                         | (<25 poor, >500 excellent) |
| Apparent MDCK permeability (nm/sec)   |                                    | 457                         | (<25 poor, >500 excellent) |
| QP log Kp for skin permeability       |                                    | -3.667                      | (Kp in cm/hr)              |
| Jm, max transdermal transport rate    |                                    | 0.035                       | (µg/cm <sup>2</sup> hr)    |
| Lipinski's rule of 5 violations       |                                    | 0                           | (maximum is 4)             |
| Jorgensen's rule of 3 violations      |                                    | 0                           | (maximum is 3)             |

**QP Breakdown (< for descriptor over training max)**

| <b>log Po/w:</b>             |        | <b>-log S:</b>               |        |
|------------------------------|--------|------------------------------|--------|
| H-bond donor                 | -0.900 | H-bond donor                 | -1.205 |
| H-bond acceptor              | -2.557 | H-bond acceptor              | -2.749 |
| Volume                       | 5.511  | SASA                         | 9.164  |
| Ac x Dn <sup>0.5</sup> /SASA | 0.834  | Ac x Dn <sup>0.5</sup> /SASA | 1.880  |

|                |        |                |        |
|----------------|--------|----------------|--------|
| FISA           | -1.005 | Rotor bonds    | -0.326 |
| Non-con amines | 0.000  | N protonation  | 0.000  |
| Non-con amides | 0.000  | Non-con amides | 0.000  |
| WPSA and PISA  | 0.375  | WPSA           | 0.300  |
| Constant       | -0.705 | Constant       | -3.783 |
| Total          | 1.553  | Total          | 3.282  |

**log BB:**

|                  |               |
|------------------|---------------|
| Hydrophilic SASA | -1.212        |
| WPSA             | 0.169         |
| Rotor bonds      | -0.121        |
| N protonation    | 0.000         |
| FOSA             | 0.000         |
| Constant         | 0.564         |
| Total            | <u>-0.600</u> |

**Table S3.** Chemoinformatic analyses of DCEAA (**9**) with Schrödinger's QikProp. Resulting statistics were generated on a QM optimized version of DCEAA (**9**).

**Principal Descriptors: (Range 95% of Drugs)**

|                             |                                    |         |                |
|-----------------------------|------------------------------------|---------|----------------|
| Solute                      | molecular weight                   | 345.185 | (130.0/725.0)  |
| Solute                      | dipole moment (D)                  | 3.056   | (1.0/12.5)     |
| Solute                      | total SASA                         | 505.874 | (300.0/1000.0) |
| Solute                      | hydrophobic SASA                   | 165.316 | (0.0/750.0)    |
| Solute                      | hydrophilic SASA                   | 151.919 | (7.0/330.0)    |
| Solute                      | carbon Pi SASA                     | 52.495  | (0.0/ 450.0)   |
| Solute                      | weakly polar SASA                  | 136.144 | (0.0/175.0)    |
| Solute                      | molecular volume (Å <sup>3</sup> ) | 888.714 | (500.0/2000.0) |
| Solute                      | vdW polar SA (PSA)                 | 96.648  | (7.0/200.0)    |
| Solute                      | no. of rotatable bonds             | 2.000   | (0.0/15.0)     |
| Solute as donor             | -hydrogen bonds                    | 3.000   | (0.0/6.0)      |
| Solute as acceptor          | -hydrogen bonds                    | 5.250   | (2.0/20.0)     |
| Solute globularity          | (sphere = 1)                       | 0.884   | (0.75/0.95)    |
| Solute ionization potential | (eV)                               | 8.860   | (7.9/10.5)     |
| Solute electron affinity    | (eV)                               | -0.003  | (-0.9/1.7)     |

**Predictions for properties: (Range 95% of drugs)**

|                                       |          |                            |
|---------------------------------------|----------|----------------------------|
| QP polarizability (Å <sup>3</sup> )   | 28.629M  | (13.0/70.0)                |
| QP log P for hexadecane-gas           | 9.660 M  | (4.0/18.0)                 |
| QP log P for octanol-gas              | 17.206 M | (8.0/35.0)                 |
| QP log P for water-gas                | 11.499 M | (4.0/45.0)                 |
| QP log P for octanol-water            | 1.963    | (-2.0/6.5)                 |
| QP log S for aqueous solubility       | -3.914   | (-6.5/0.5)                 |
| QP log S- conformation-independent    | -4.572   | (-6.5/0.5)                 |
| QP log K hsa serum protein binding    | -0.066   | (-1.5/1.5)                 |
| QP log BB for brain-blood             | -0.520   | (-3.0/1.2)                 |
| No. of primary metabolites            | 1        | (1.0/8.0)                  |
| HERG K+ channel blockage: log IC50    | -3.664   | (<-5 poor)                 |
| Apparent Caco-2 permeability (nm/sec) | 359      | (<25 poor, >500 excellent) |
| Apparent MDCK permeability (nm/sec)   | 910      | (<25 poor, >500 excellent) |
| QP log Kp for skin permeability       | -3.942   | (Kp in cm/hr)              |
| Jm, max transdermal transport rate    | 0.00     | (µg/cm <sup>2</sup> hr)    |
| Lipinski's rule of 5 violations       | 0        | (maximum is 4)             |
| Jorgensen's rule of 3 violations      | 0        | (maximum is 3)             |

**QP Breakdown (< for descriptor over training max)**

| <b><u>log Po/w:</u></b>      |        | <b><u>-log S:</u></b>        |        |
|------------------------------|--------|------------------------------|--------|
| H-bond donor                 | -0.900 | H-bond donor                 | -1.205 |
| H-bond acceptor              | -2.557 | H-bond acceptor              | -2.749 |
| Volume                       | 5.798  | SASA                         | 9.586  |
| Ac x Dn <sup>0.5</sup> /SASA | 0.797  | Ac x Dn <sup>0.5</sup> /SASA | 1.797  |
| FISA                         | -1.051 | Rotor bonds                  | -0.362 |
| Non-con amines               | 0.000  | N protonation                | 0.000  |
| Non-con amides               | 0.000  | Non-con amides               | 0.000  |
| WPSA and PISA                | 0.581  | WPSA                         | 0.593  |
| Constant                     | -0.705 | Constant                     | -3.783 |
| Total                        | 1.963  | Total                        | 3.914  |

**log BB:**

|                  |        |
|------------------|--------|
| Hydrophilic SASA | -1.297 |
| WPSA             | 0.334  |
| Rotor bonds      | -0.121 |
| N protonation    | 0.000  |
| FOSA             | 0.000  |
| Constant         | 0.564  |
| Total            | -0.520 |

**Methods on CNS pharmacokinetic (PK) analysis of Agelastatin A and its analogues (CAA, CEAA, and DCEAA):**

**Animals and housing:** Male Sprague–Dawley rats (Harlan, Indianapolis, IN, USA) were used in this CNS pharmacokinetic study on Agelastatin A and its three analogues (CAA, CEAA, and DCEAA). Six rats were used for each drug. Animal use was approved by Mayo Foundation Institutional Animal Use and Care Committee (IACUC) and was consistent with the NIH guidelines for the care and use of laboratory animals. The rats were approximately 2 months old and weighed  $300 \pm 25$  g at the beginning of the study. All rats were housed in a temperature-controlled room ( $23 \pm 2$  °C) with a 12:12 light dark cycle (lights off at 6:00pm). Purina 5001 Rodent Chow and tap water were available ad libitum at all times.

**Microdialysis surgery and procedure:**

Rats were anesthetized with gasiform isoflurane (1% isoflurane in a mixture of 20% oxygen and 80% nitrogen gas) and immobilized in a stereotaxic frame (KOPF Instruments, Tujunga, CA). Anesthesia was maintained during the entire procedure. The guide cannula (CMA Microdialysis Inc., Acton, MA) was stereotactically implanted into the lateral ventricle (AP -0.9, L 1.6, V 3.4, relative to bregma and skull), and then secured

to the skull by screws and dental cement. Following surgery, each rat was housed individually with food and water ad libitum for 3 days for recovery from cannulation surgery. Microdialysis experiments were carried out on conscious, freely moving rats. On the day of the experiment, the stylet in the guide cannula was replaced with the microdialysis probe (CMA/11 with 4 mm membrane, CMA Microdialysis Inc., Acton, MA) and a vascular microdialysis probe (CMA/20 with 4 mm membrane, CMA Microdialysis Inc, Acton, MA) was implanted into a jugular vein. The probes had inlet tubes connected to syringes to deliver artificial cerebrospinal fluid (146 mM NaCl, 1.2 mM CaCl<sub>2</sub>, 3 mM KCl, 1 mM MgCl<sub>2</sub>, 1.9 mM Na<sub>2</sub>HPO<sub>4</sub>, 0.1 mM NaH<sub>2</sub>PO<sub>4</sub>, pH 7.4) into the ventricle and Dulbecco's phosphate-buffered saline (D-PBS) into the blood at 0.5 µl/min flow rate. The outlet tubes were connected to a microfraction collector and the dialysates were collected at 4°C. Rats were allowed to recover for at least 24 hours prior to the administration of drugs. Single 2.5 mg/kg dose administered intravenously was used for all the drugs. Three baseline fractions were collected before the drug injection and then 22 samples were collected over 18 hours after the injection. All samples were applied to the capillary electrophoresis with UV detection (CE-UV) for the determination of concentration of the drug in CSF and blood. The rats were sacrificed using CO<sub>2</sub> inhalation after the experiment. The position of the probe was verified by visual inspection at the end of each experiment.

#### **Determination of Agelastatin A and its three analogues with the use of CE-UV:**

The drug concentration in the microdialysate was measured by CE-UV (Agilent 3D CE). Briefly, the capillaries were preconditioned with 1 M sodium hydroxide for 2 min, water for 2 min and running buffer [100 mmol/L solution of ammonium acetate (adjusted to pH 3.1 with acetic acid)-acetonitrile (50:50, v/v)] for 3 min. The samples were injected at a pressure of 0.7 psi for 5 s and the injection volume was approximately 5 nl. After injection, the drug was separated in a fused silica capillary of 50 µm I.D. and 50/65 cm length (effective length/total length) under 15 kv and 25°C. The absorbance from the drug was detected with UV at 280 nm. The emission was collected on a photomultiplier tube (PMT). The detection limit of AA, CAA, CEAA and DCEAA are 3.8 nM, 1.9 nM, 1.2 nM and 2.9 nM, respectively.

### **Statistical analysis:**

Two-way repeated measures ANOVA followed by Tukey's test was used.  $P < 0.05$  was considered significant. CNS penetration is determined as the ratio of CSF and blood area under the curve (AUC).

### **References**

1. (a) T. Yoshimitsu, T. Ino, T. Tanaka, *Org. Lett.* 2008, **10**, 5457. (b) T. Yoshimitsu, T. Ino, N. Futamura, T. Kamon, T. Tanaka, *Org. Lett.* 2009, **11**, 3402.
2. T. Mosmann, *J. Immunol. Methods* 1983, **65**, 55.
3. T. Caulfield, B. Devkota, *Proteins*, 2012, 2489.
4. Z. Li, T. Kamon, D. A. Personett, T. Caulfield, J. A. Copland, T. Yoshimitsu, H. W. Tun, *Med. Chem. Commun.* 2012, **3**, 233.
5. Z. Li, T. Caulfield, Y. Qiu, J. A. Copland, H. W. Tun, *Med. Chem. Commun.* 2012, **3**, 1526.
6. Suite 2012: Qikprop, version 3.5, 2011, Schrödinger, LLC, New York, NY, 2012.

400MHz, CD<sub>3</sub>OD

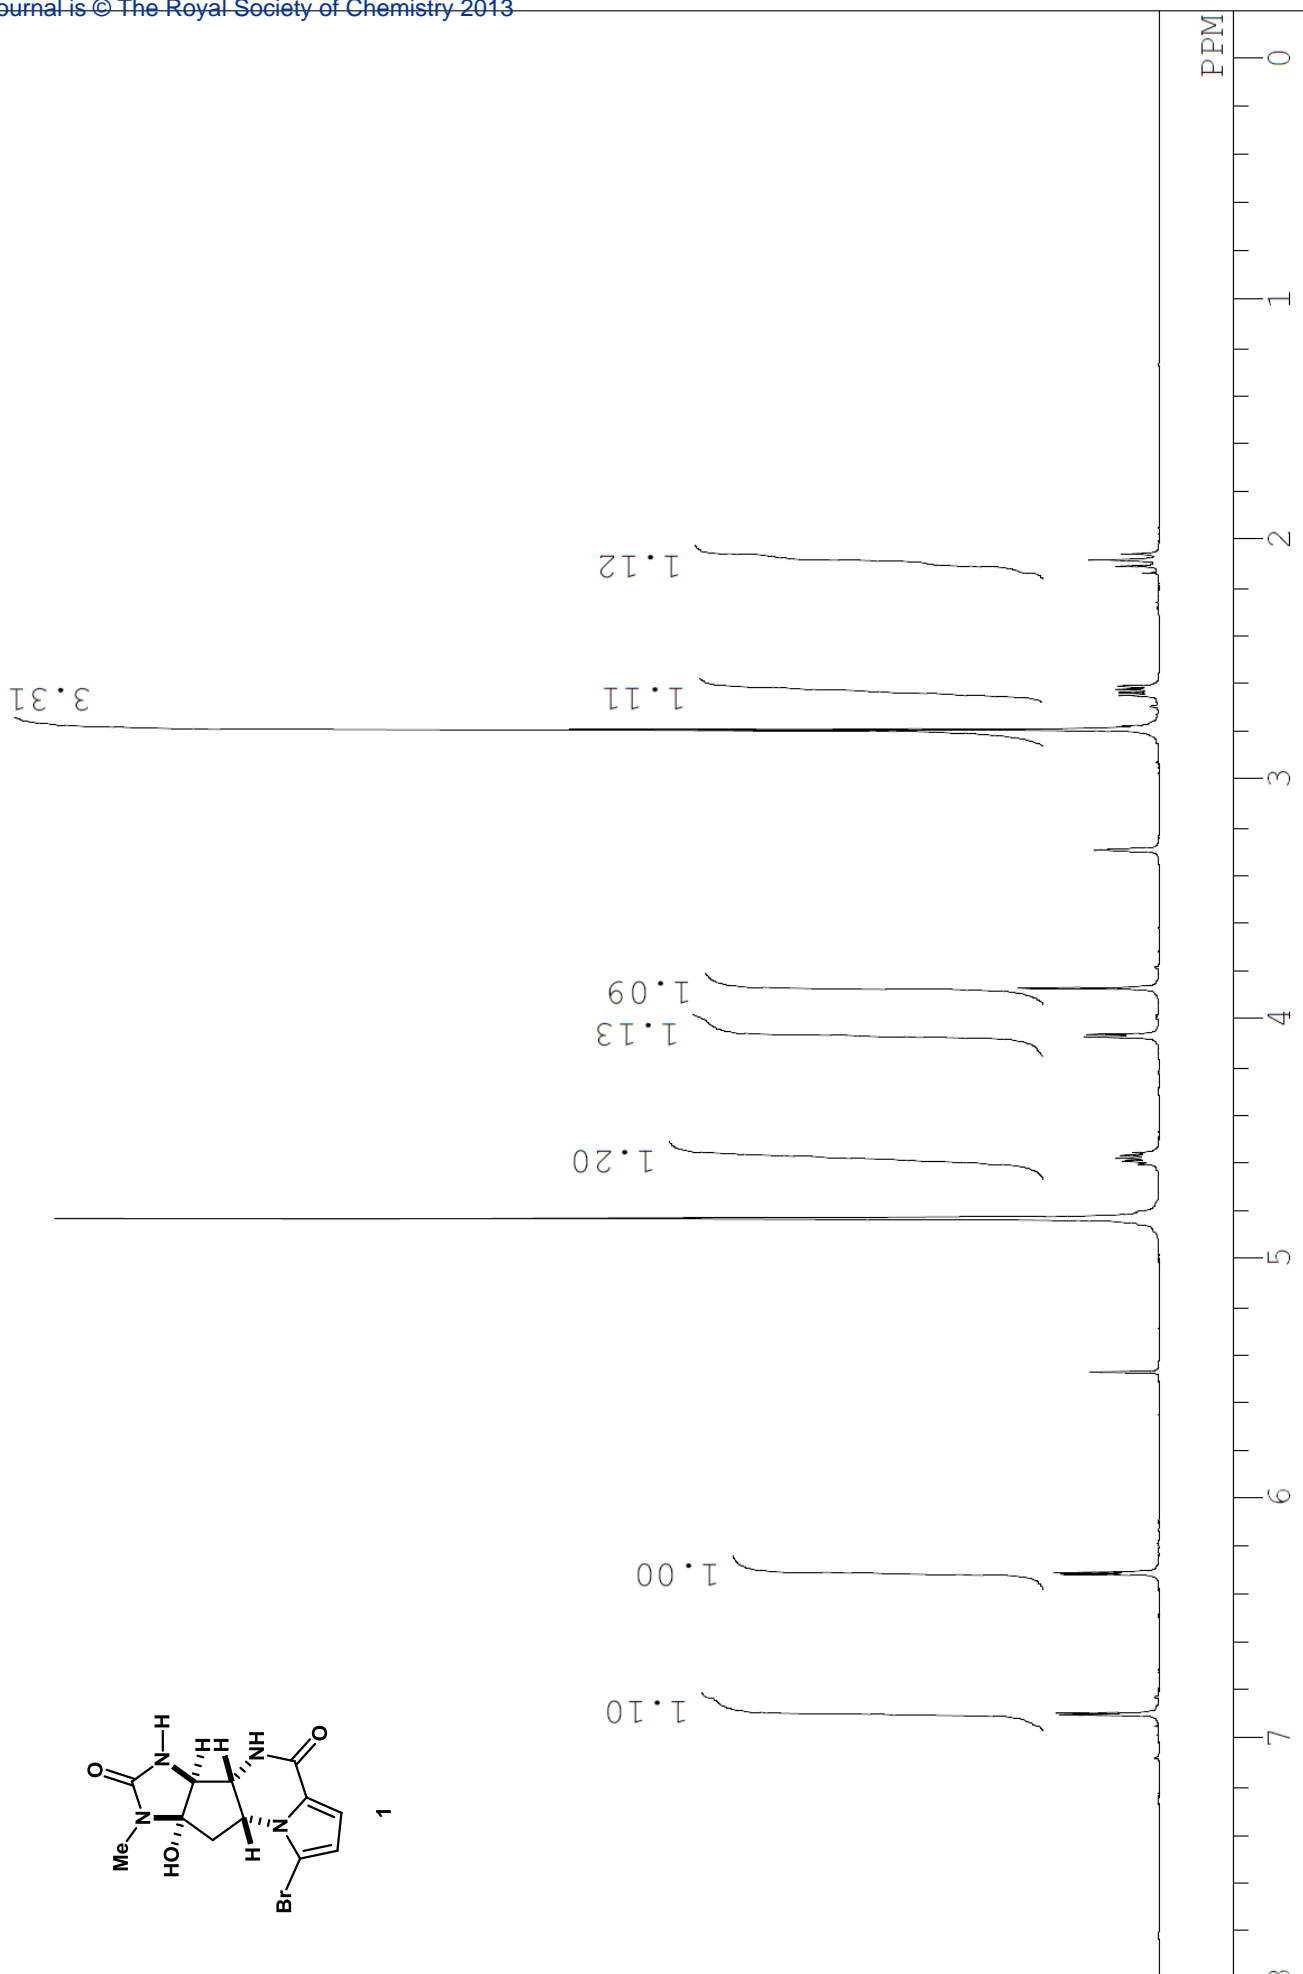

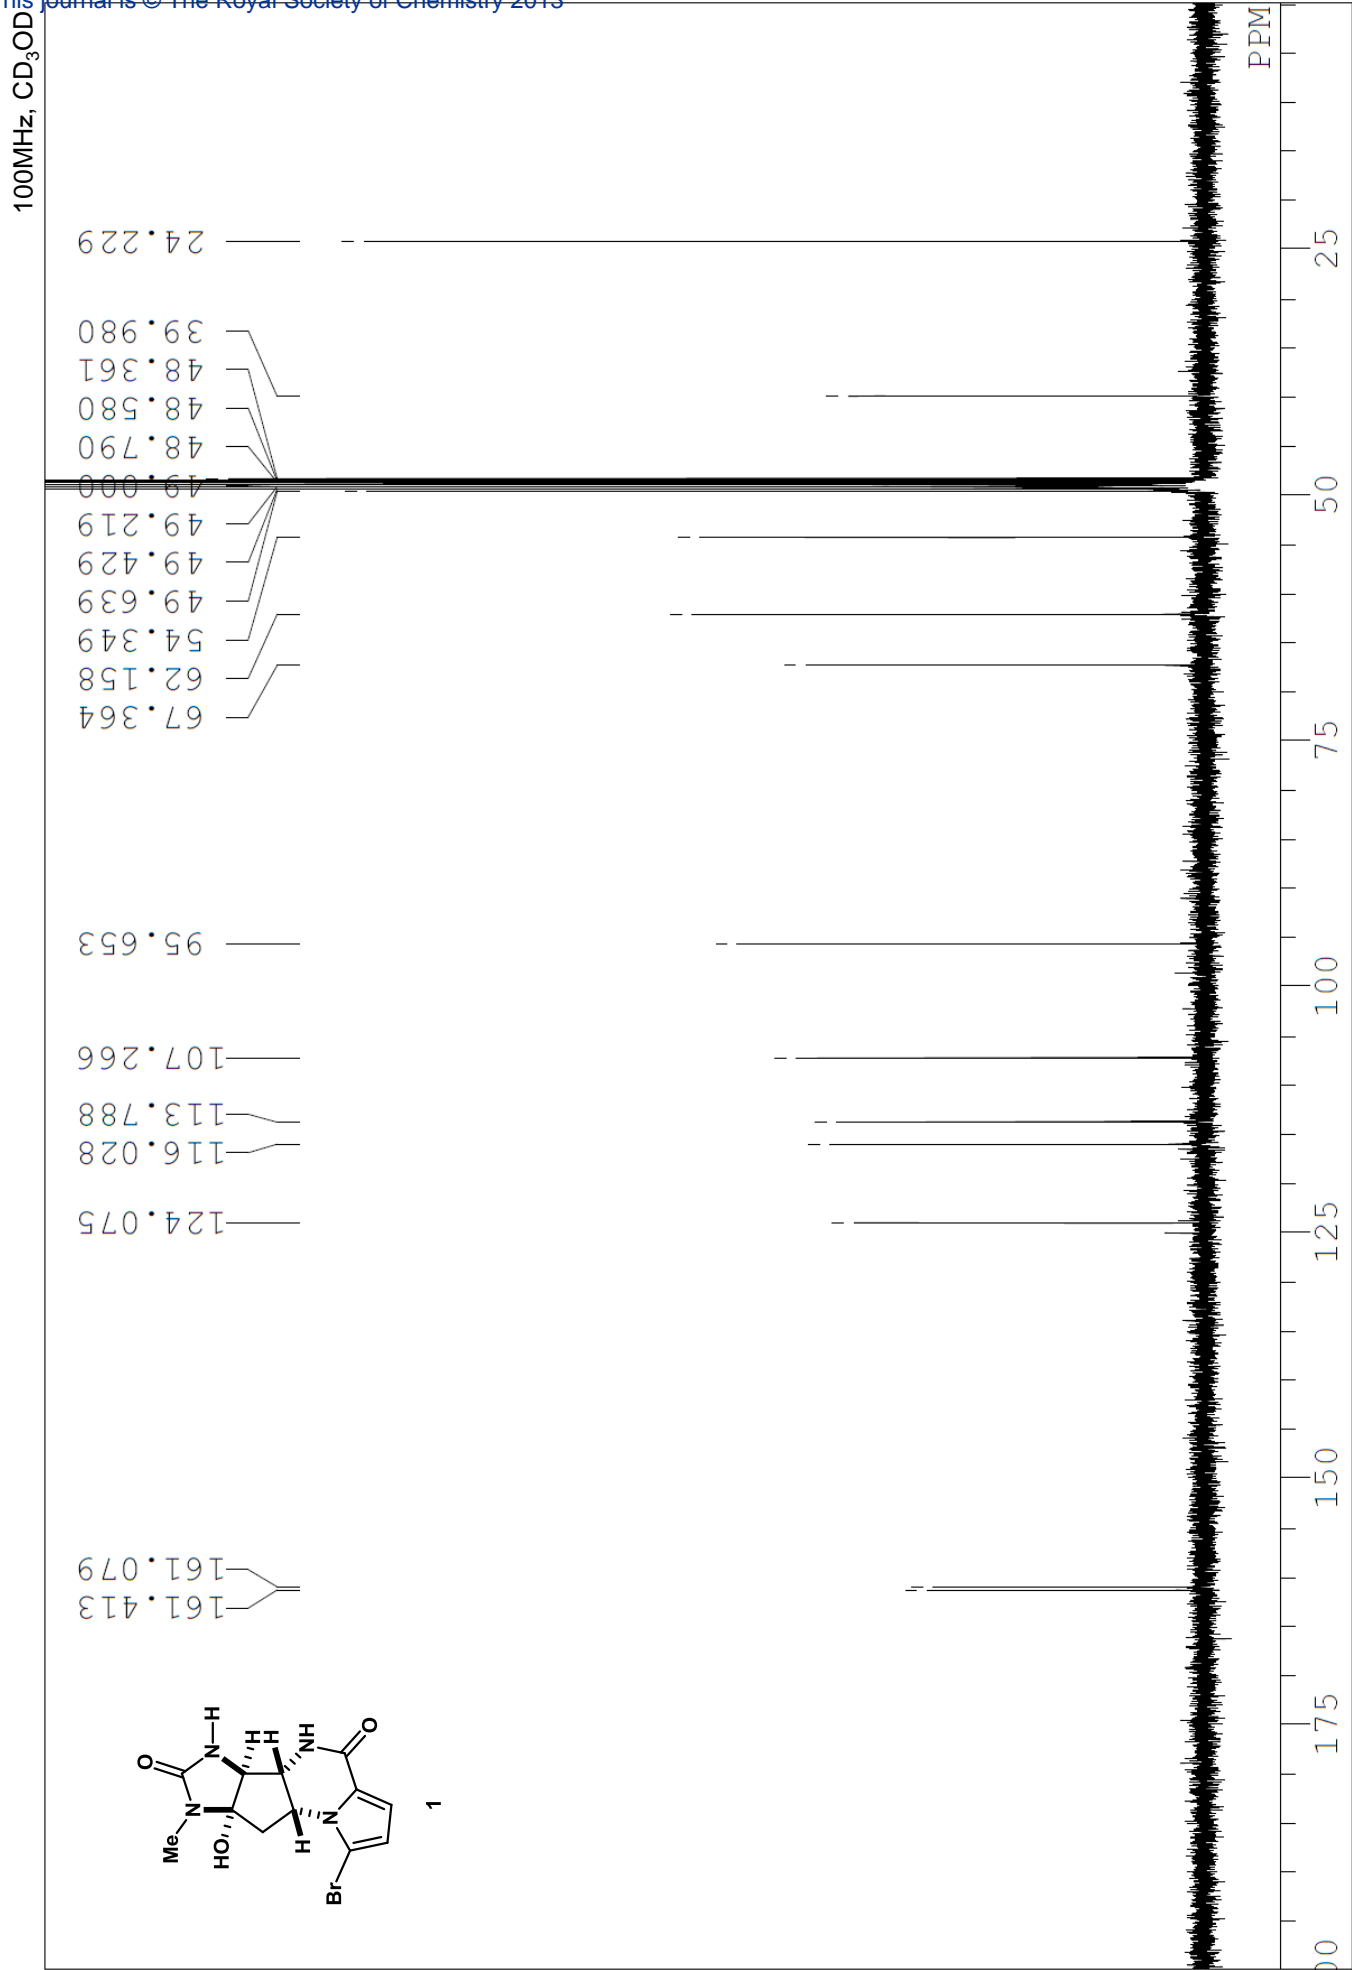

400MHz, CD<sub>3</sub>OD

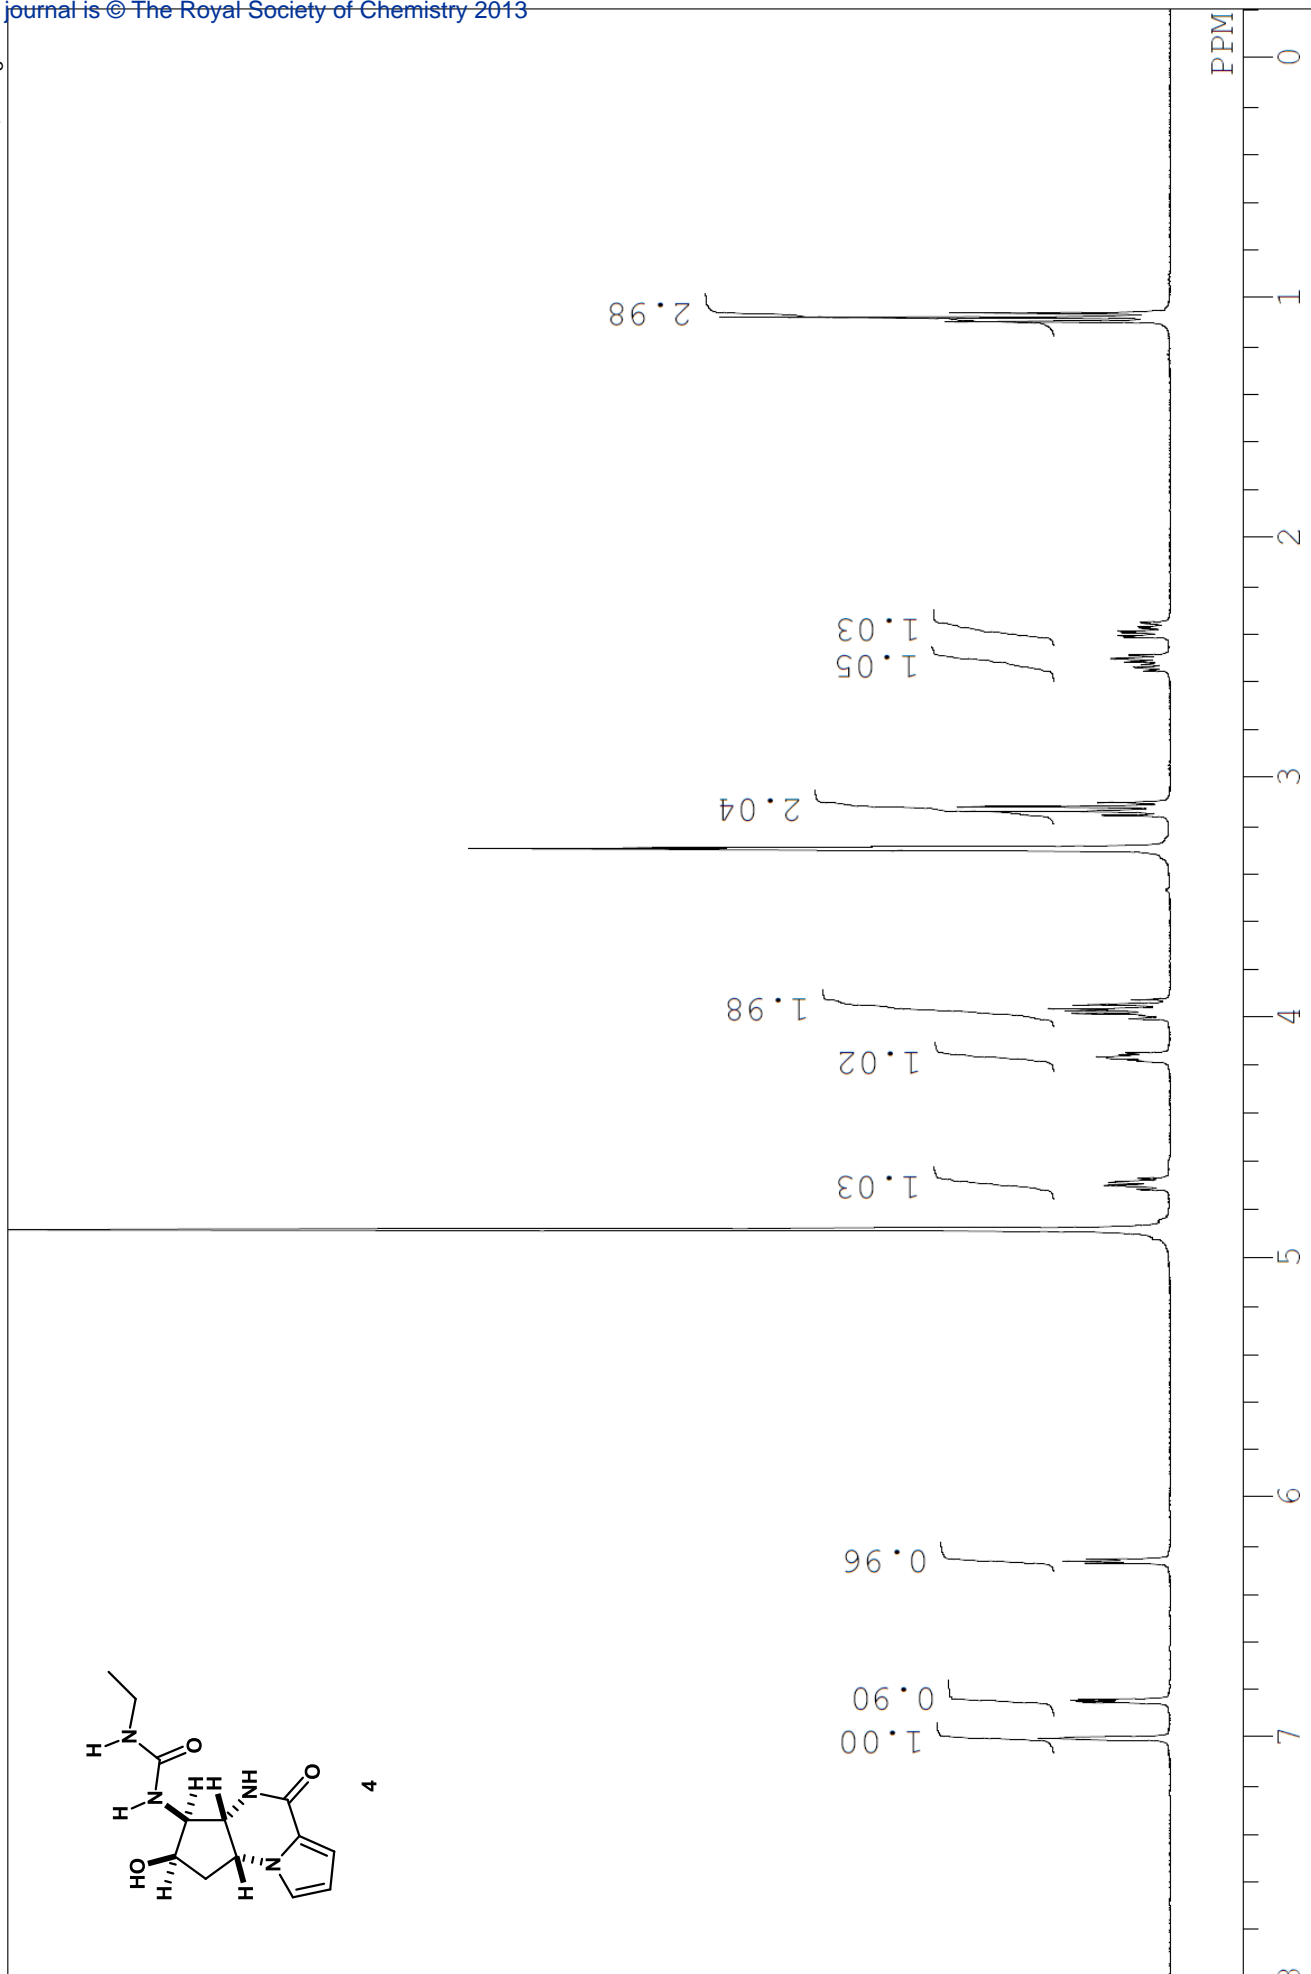



125MHz, CD<sub>3</sub>OD

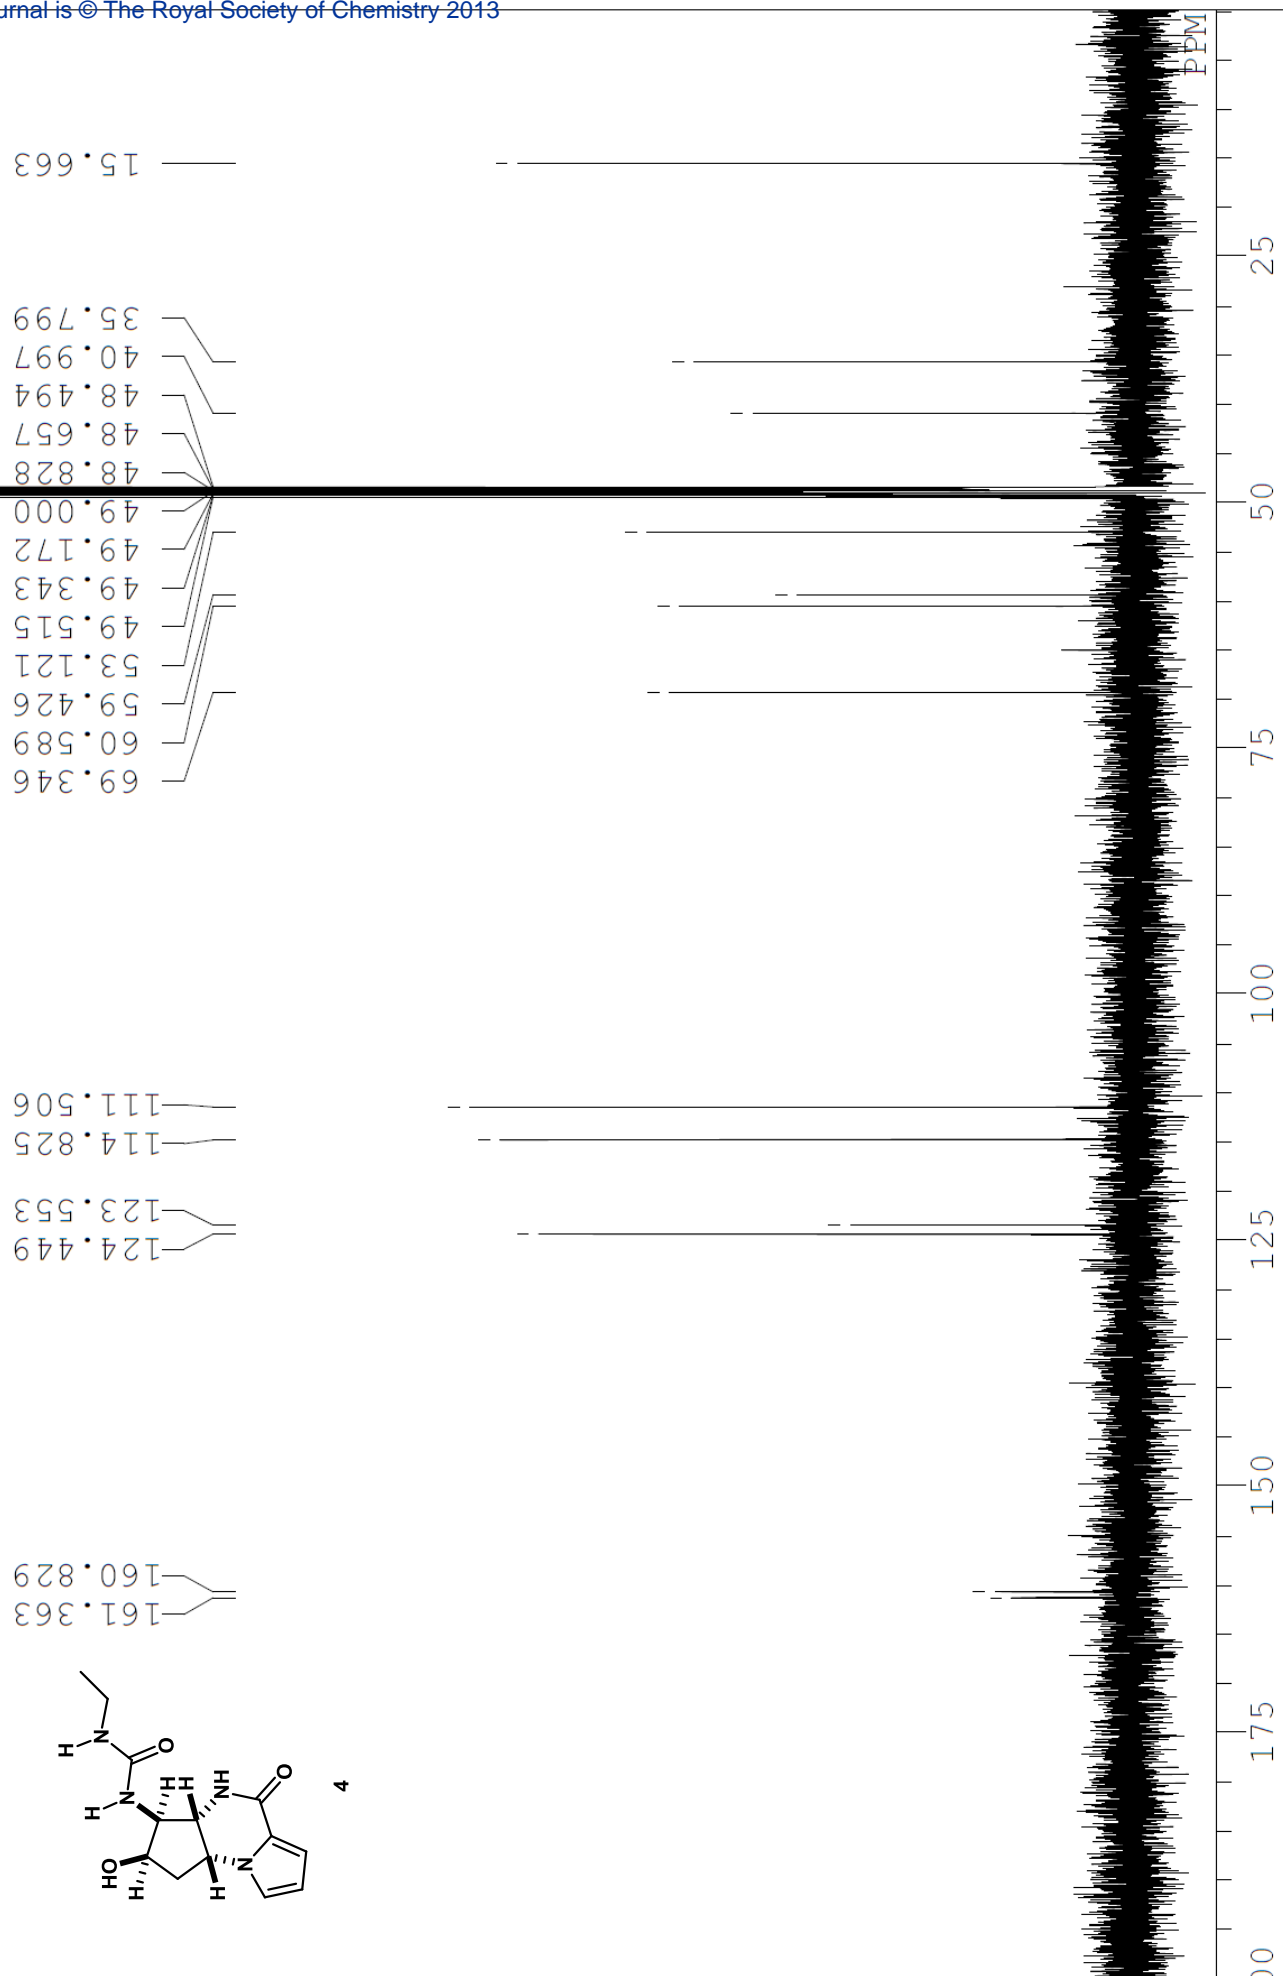

400MHz, CD<sub>3</sub>OD

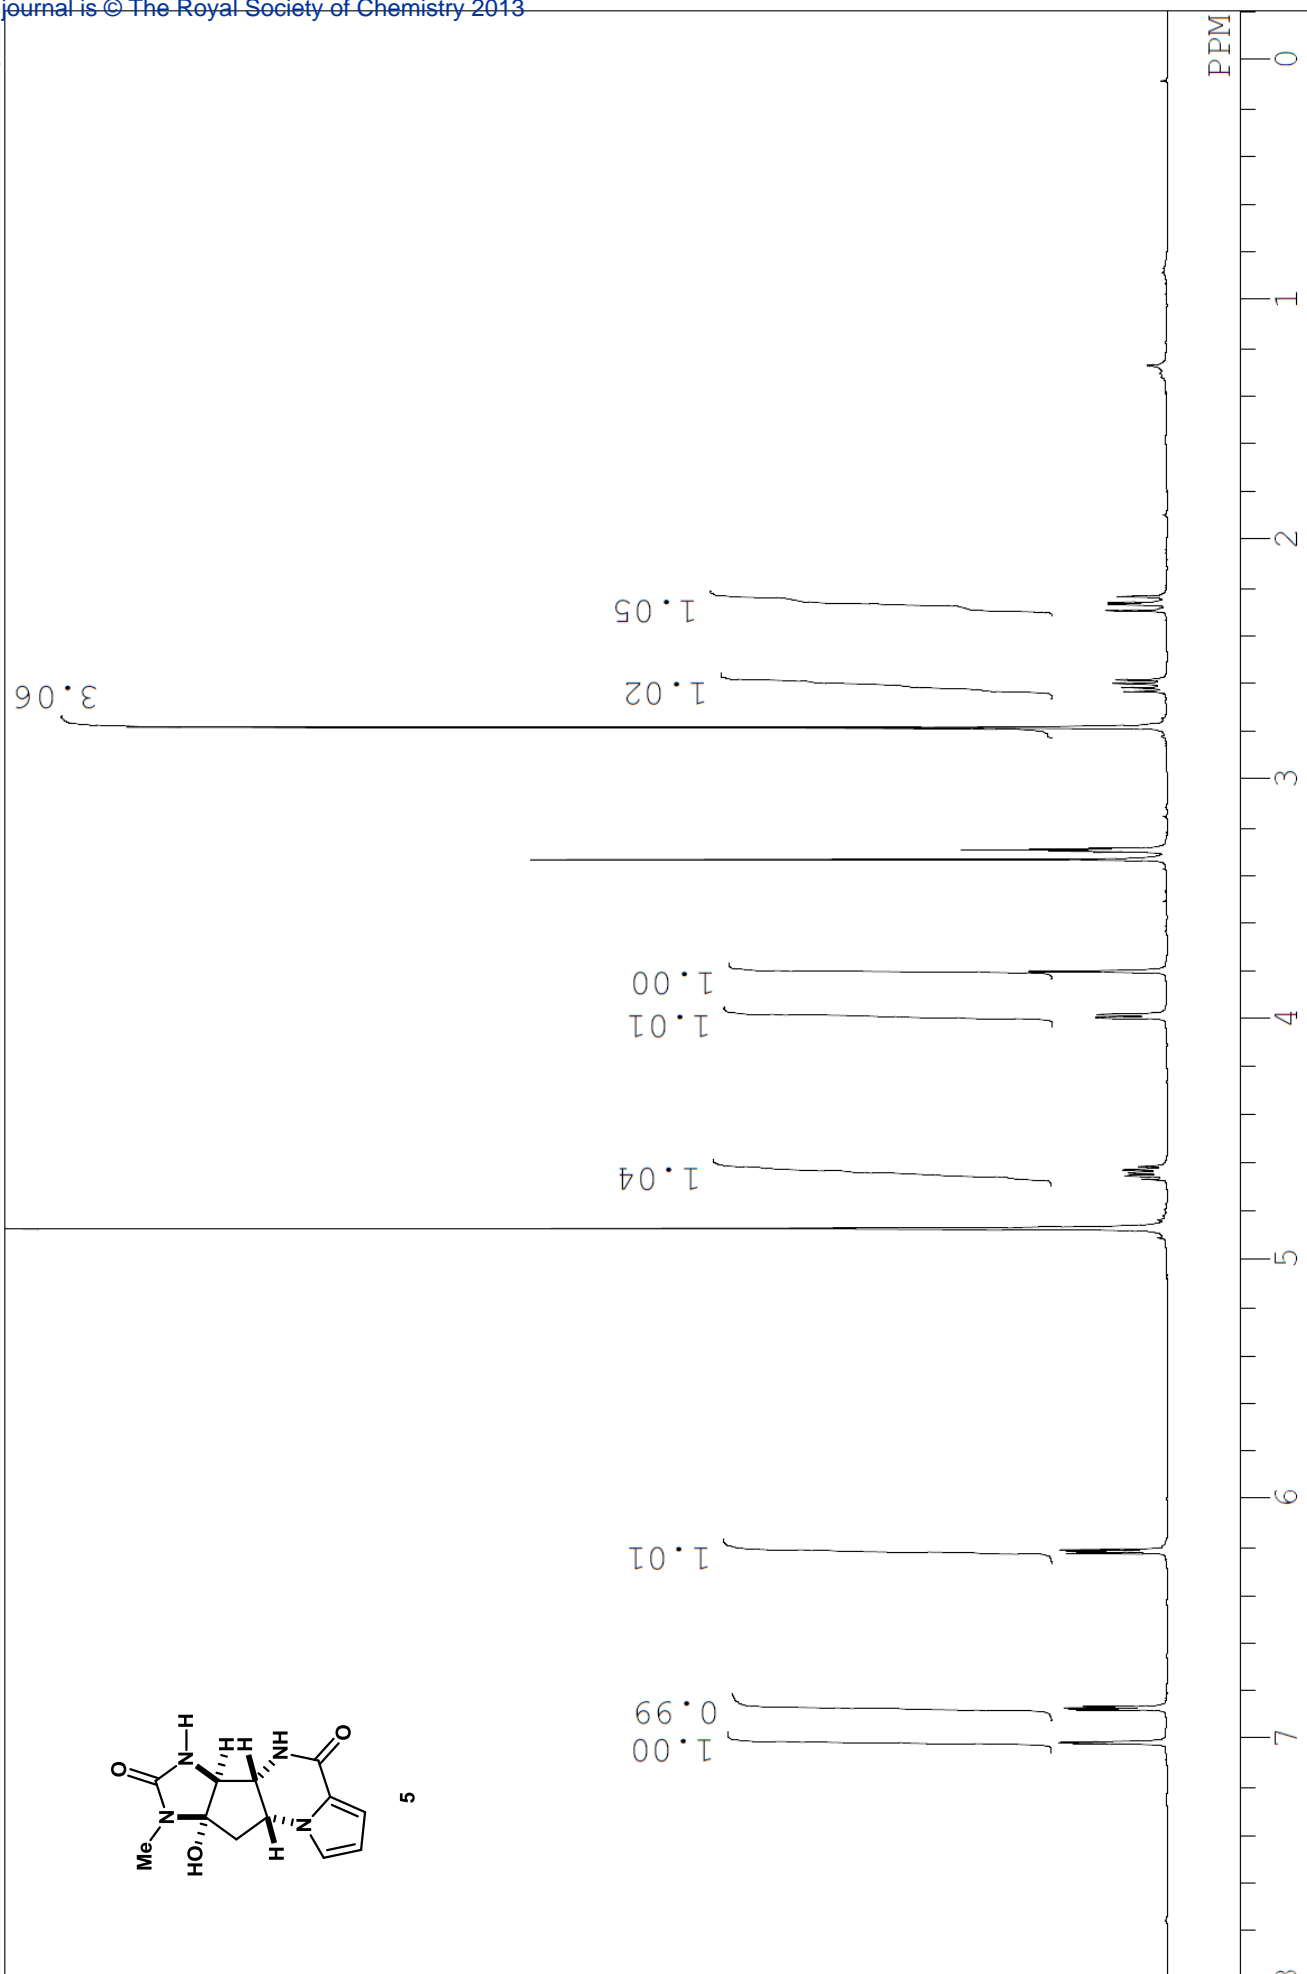

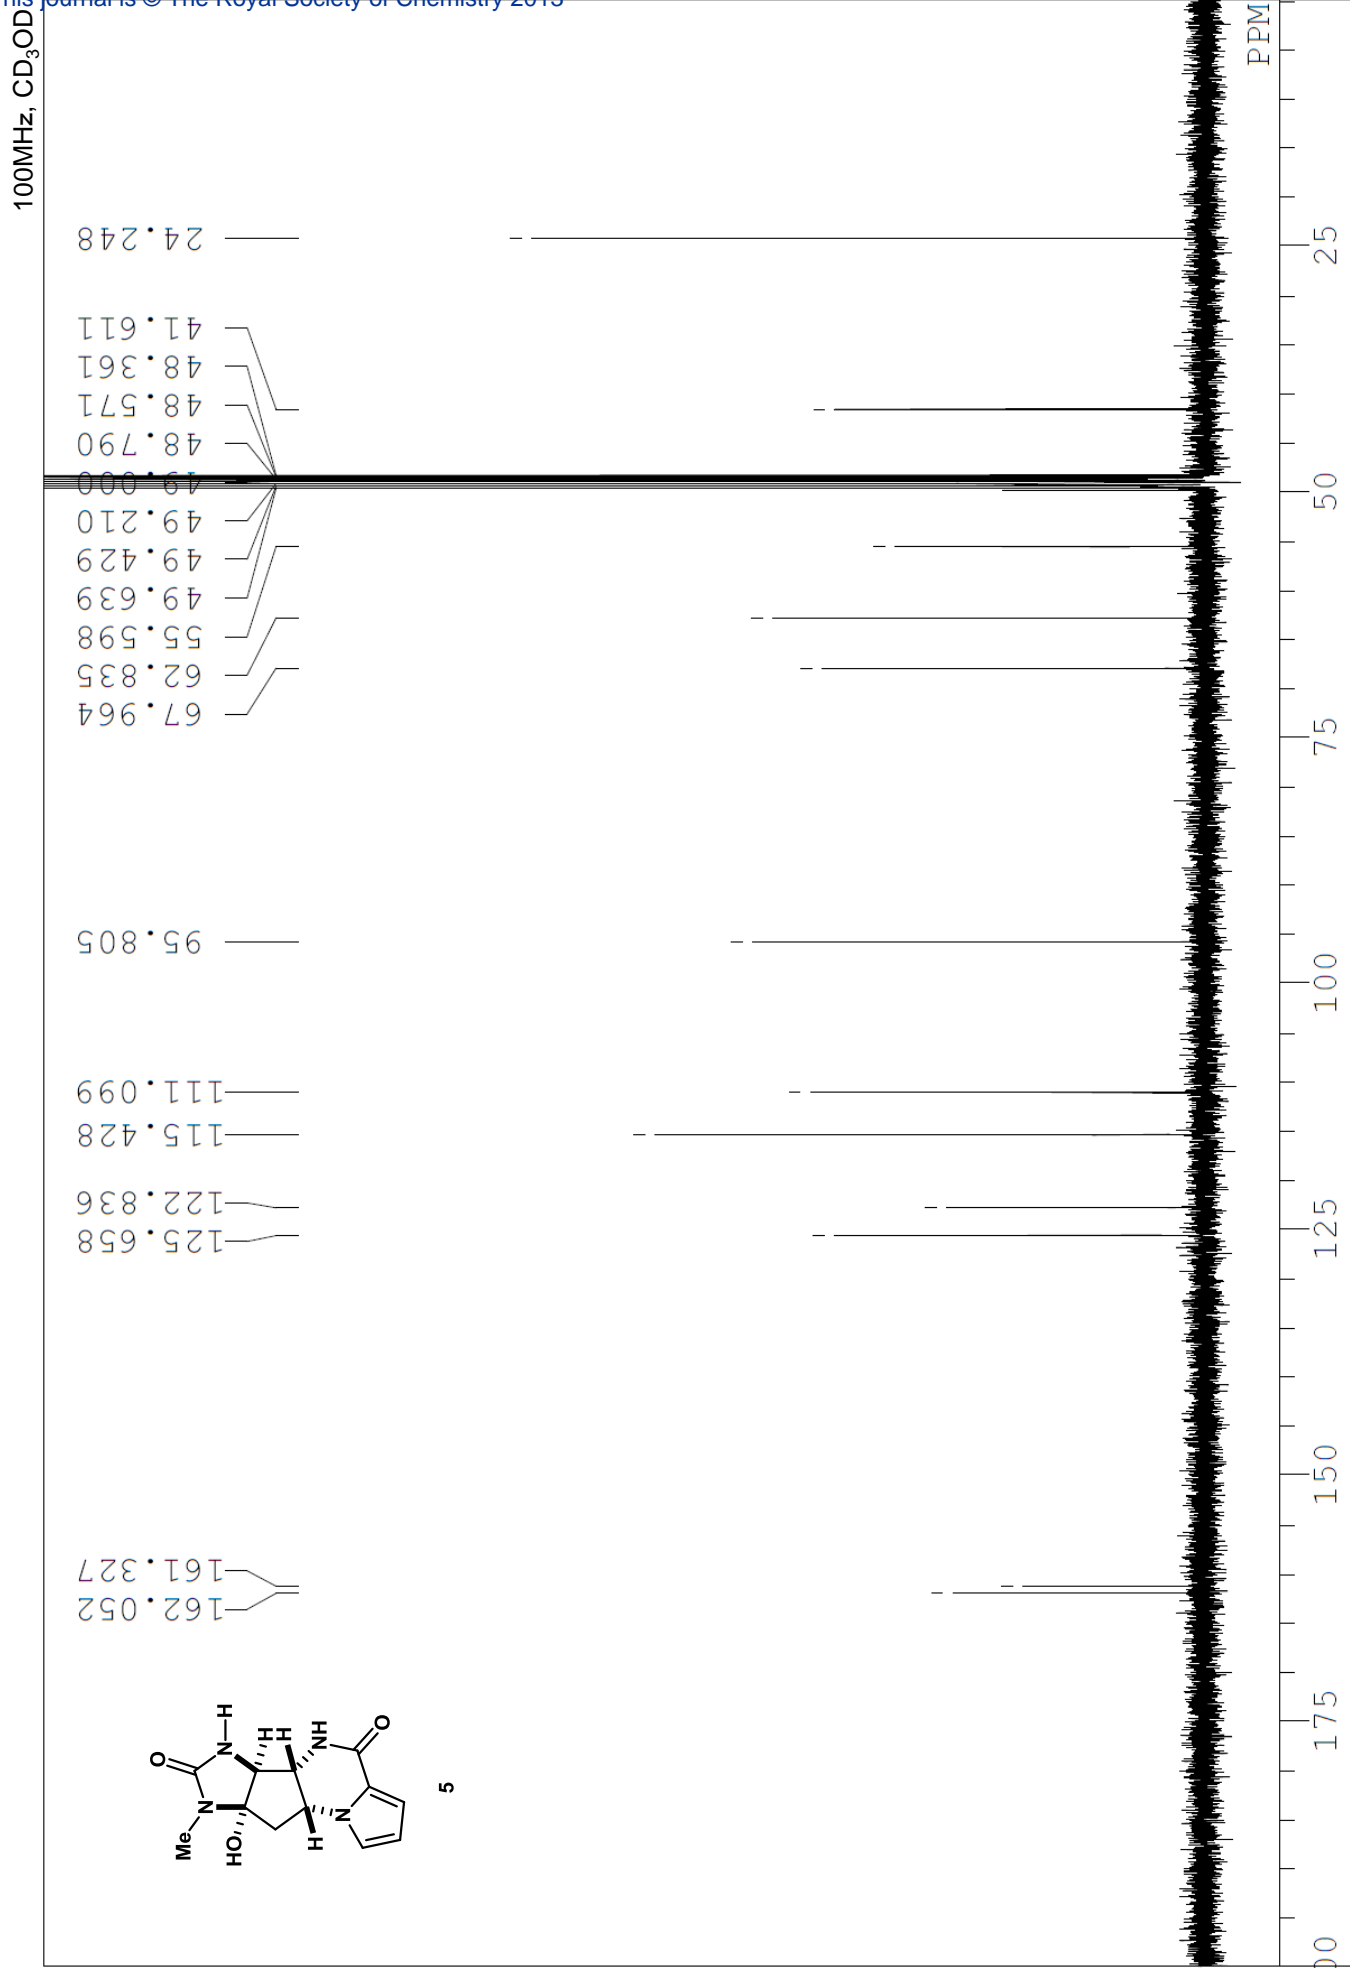

400MHz, CD<sub>3</sub>OD

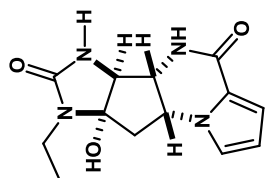

6

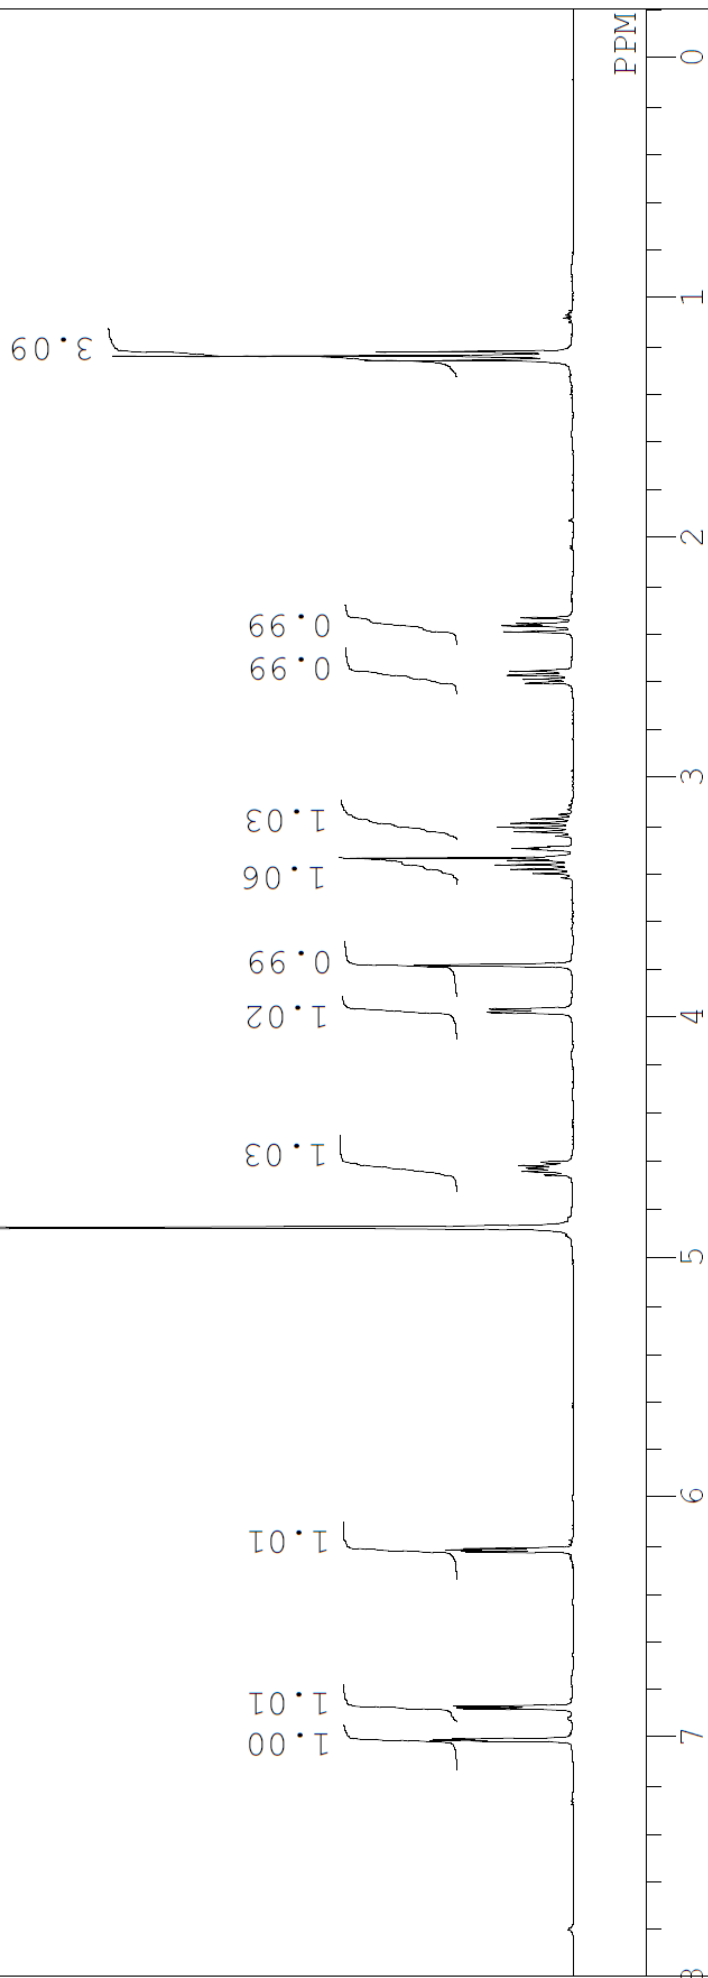

125MHz, CD<sub>3</sub>OD

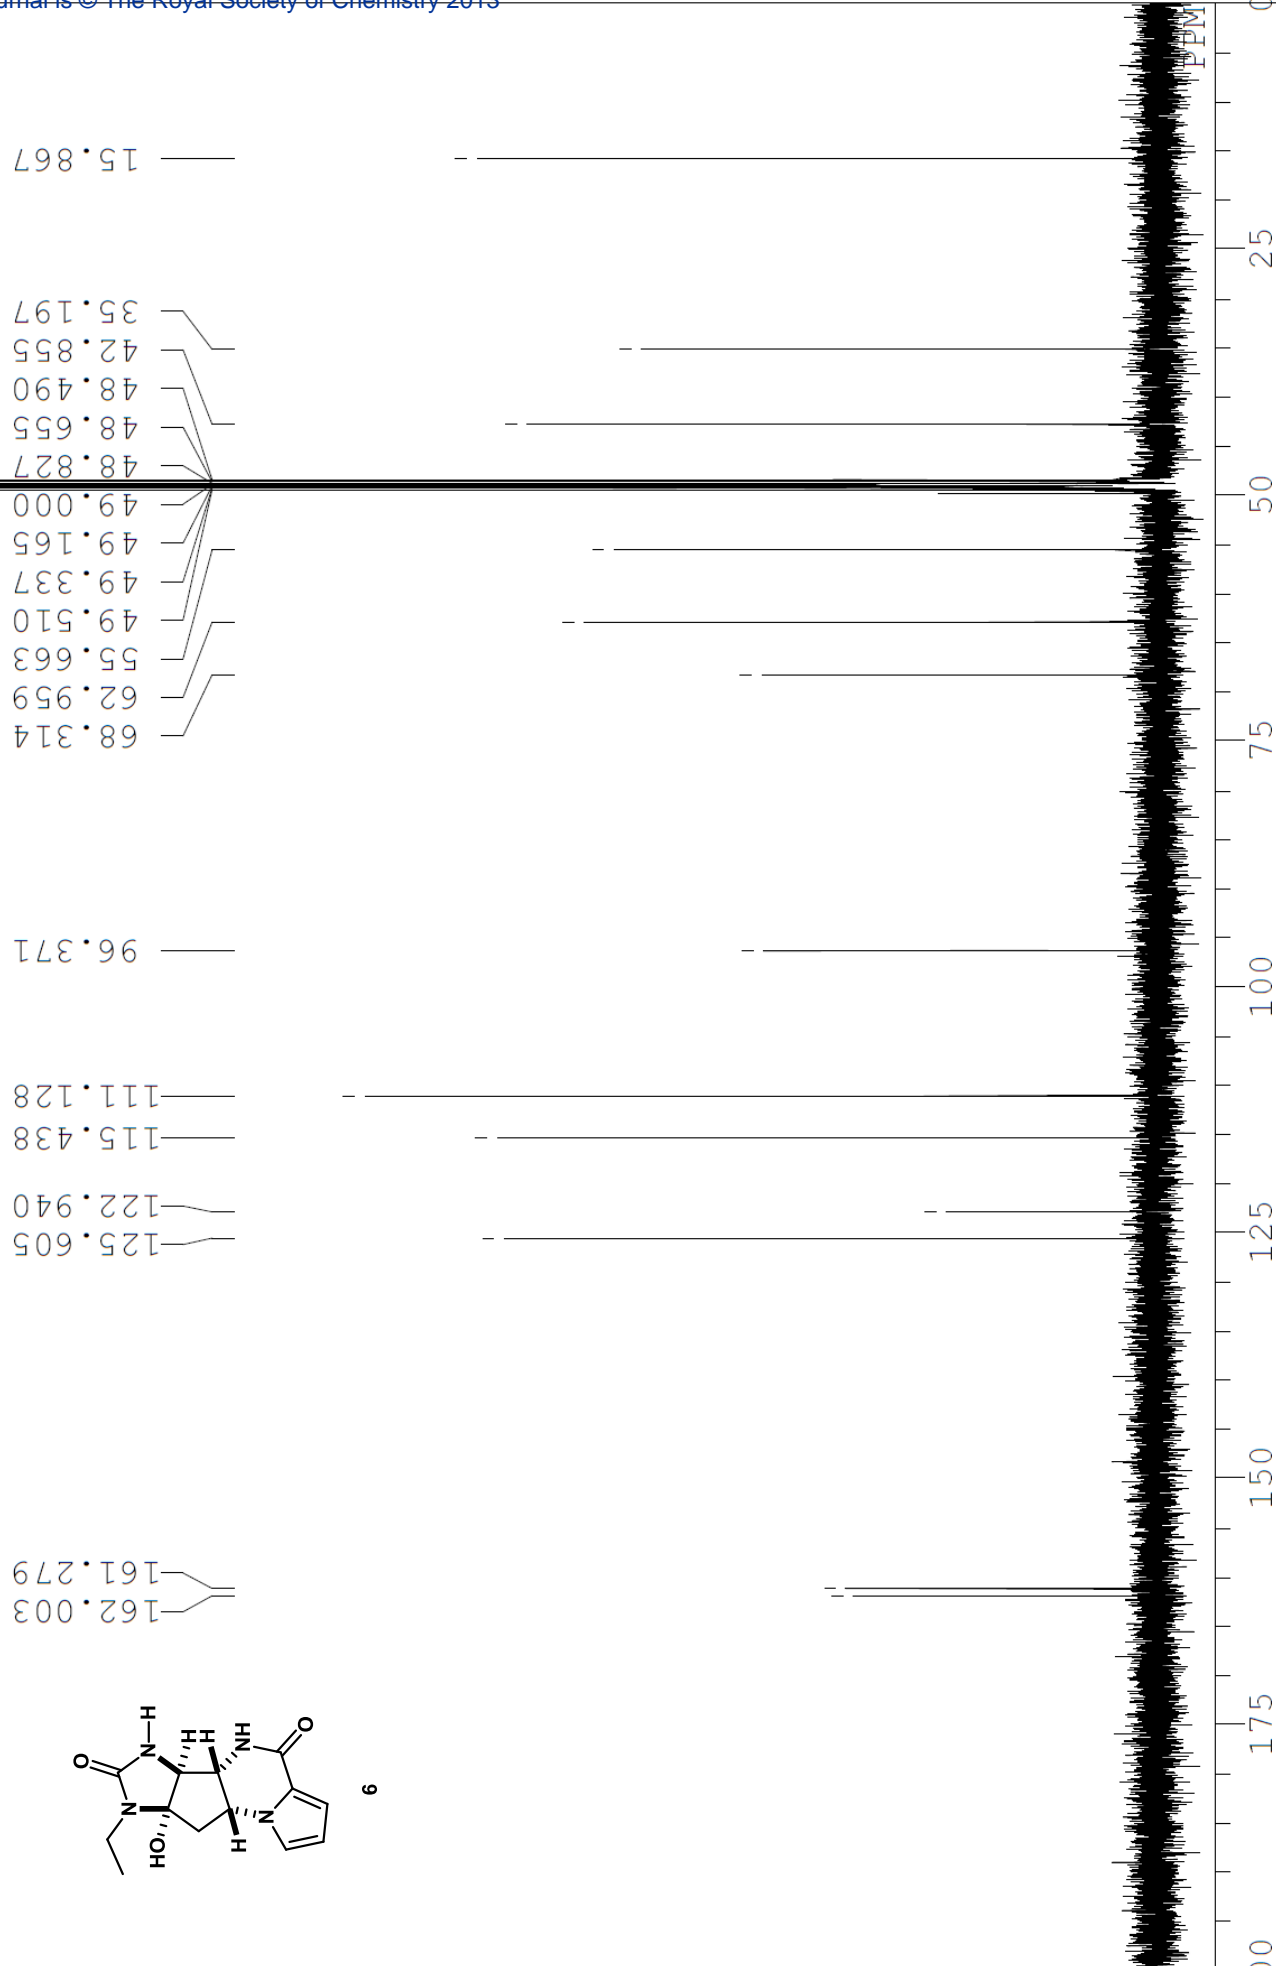

15.867

35.197

42.855

48.490

48.655

48.827

49.000

49.165

49.337

49.510

55.663

62.959

68.314

96.371

111.128

115.438

122.940

125.605

161.279

162.003

0 25 50 75 100 125 150 175 200

400MHz, CD<sub>3</sub>OD

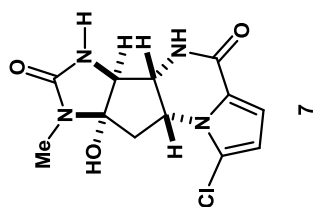

3.11  
1.07  
0.98

1.02  
1.05  
1.02

1.00  
1.03

PPM

0  
1  
2  
3  
4  
5  
6  
7  
8

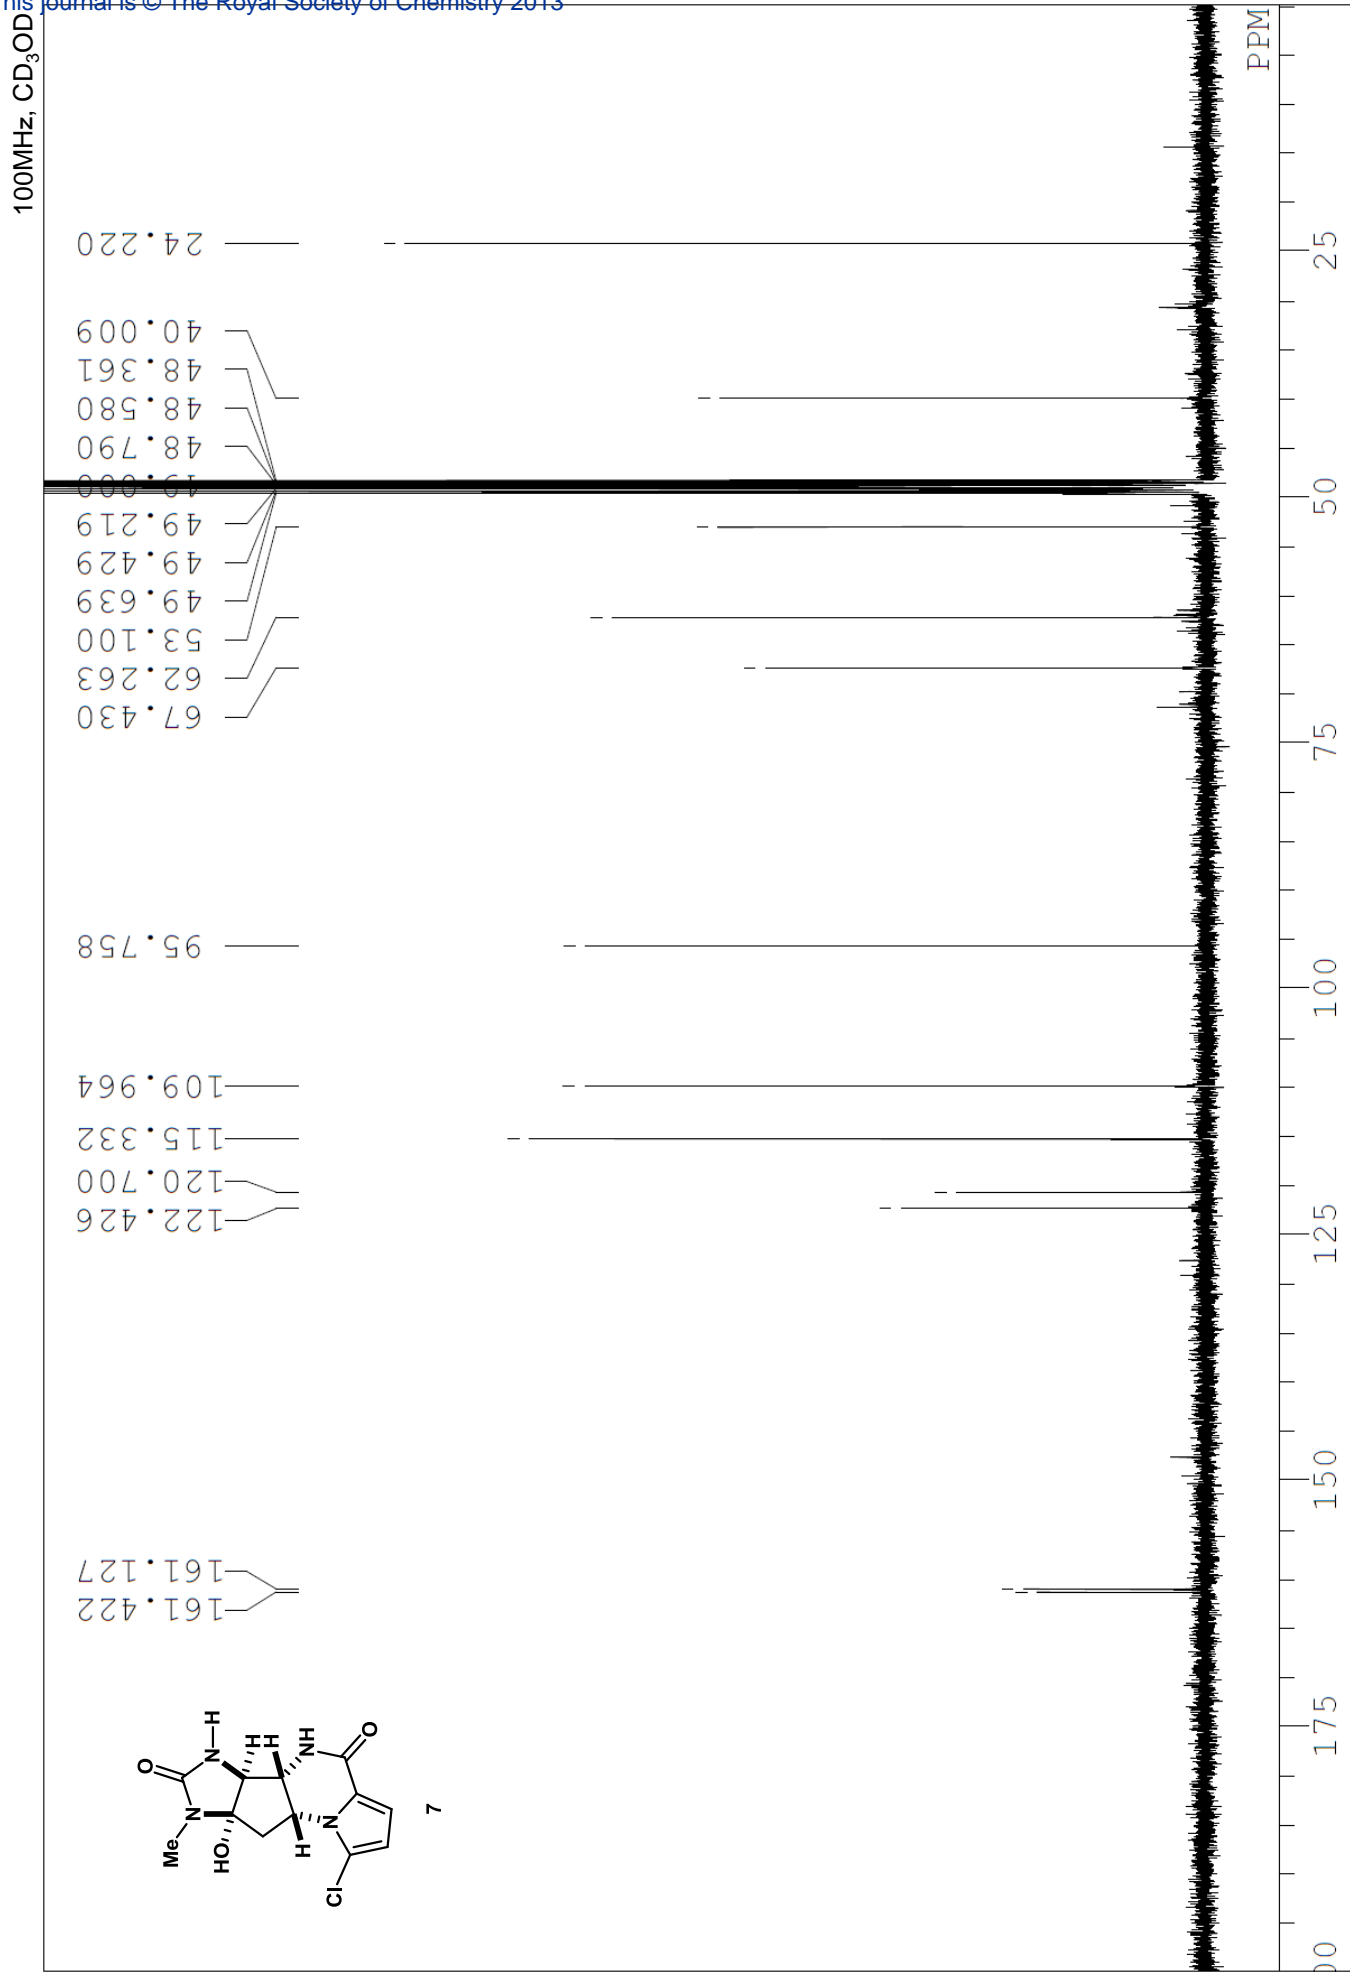

400MHz, CD<sub>3</sub>OD

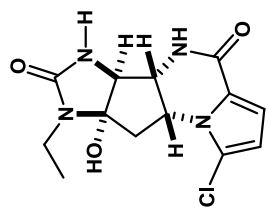

8

3.13

1.01

1.03

0.99

1.09

1.03

1.03

1.07

0.98

1.00

PPM

0

1

2

3

4

5

6

7

8



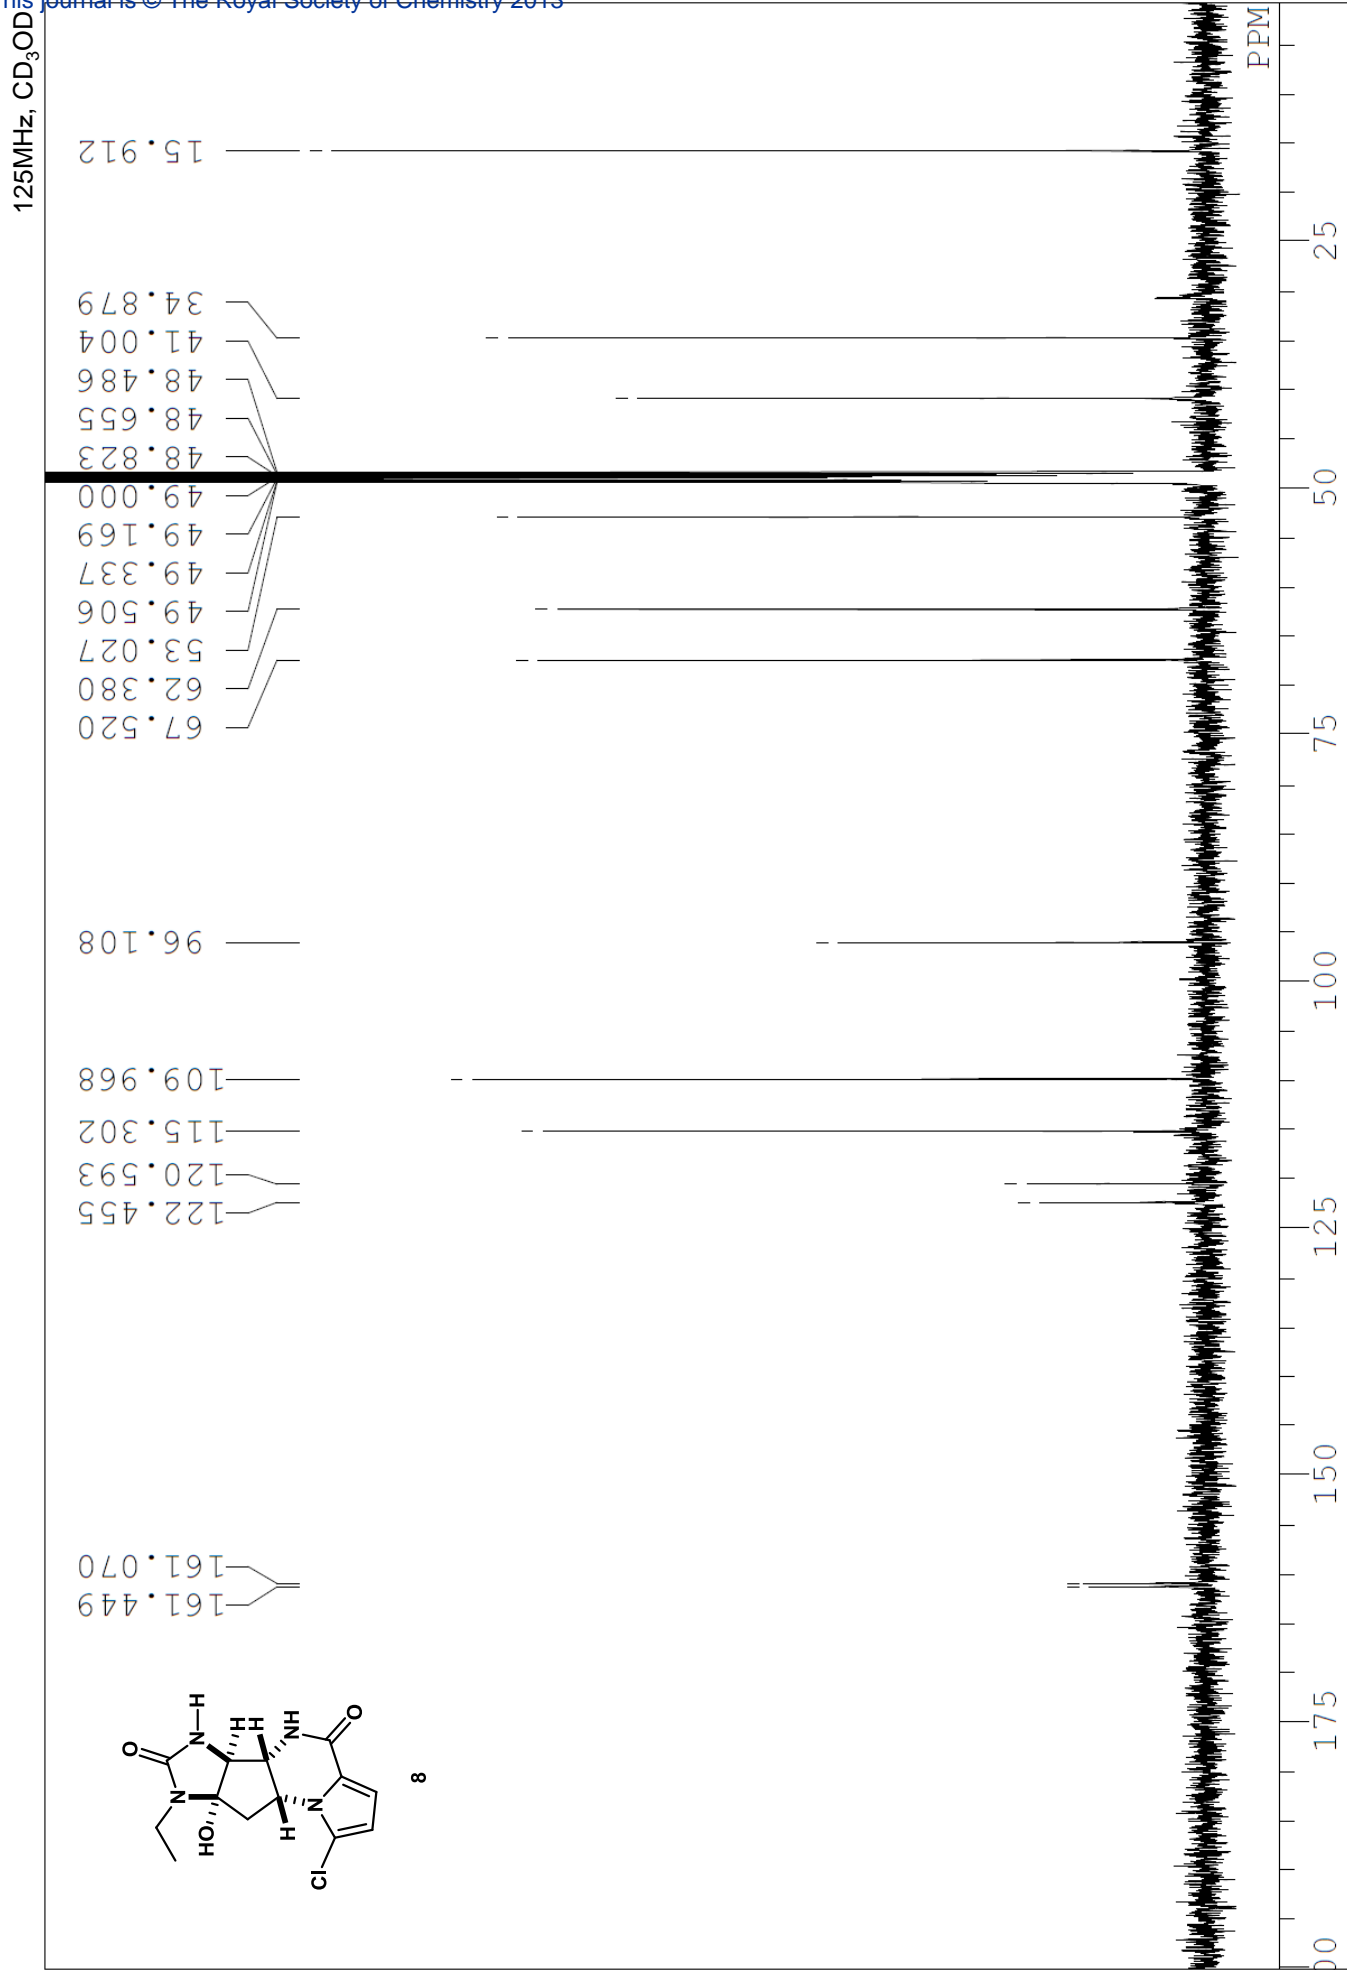

400MHz, CD<sub>3</sub>OD

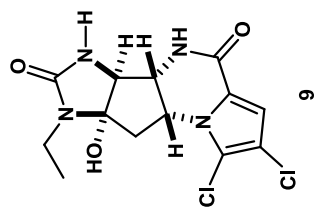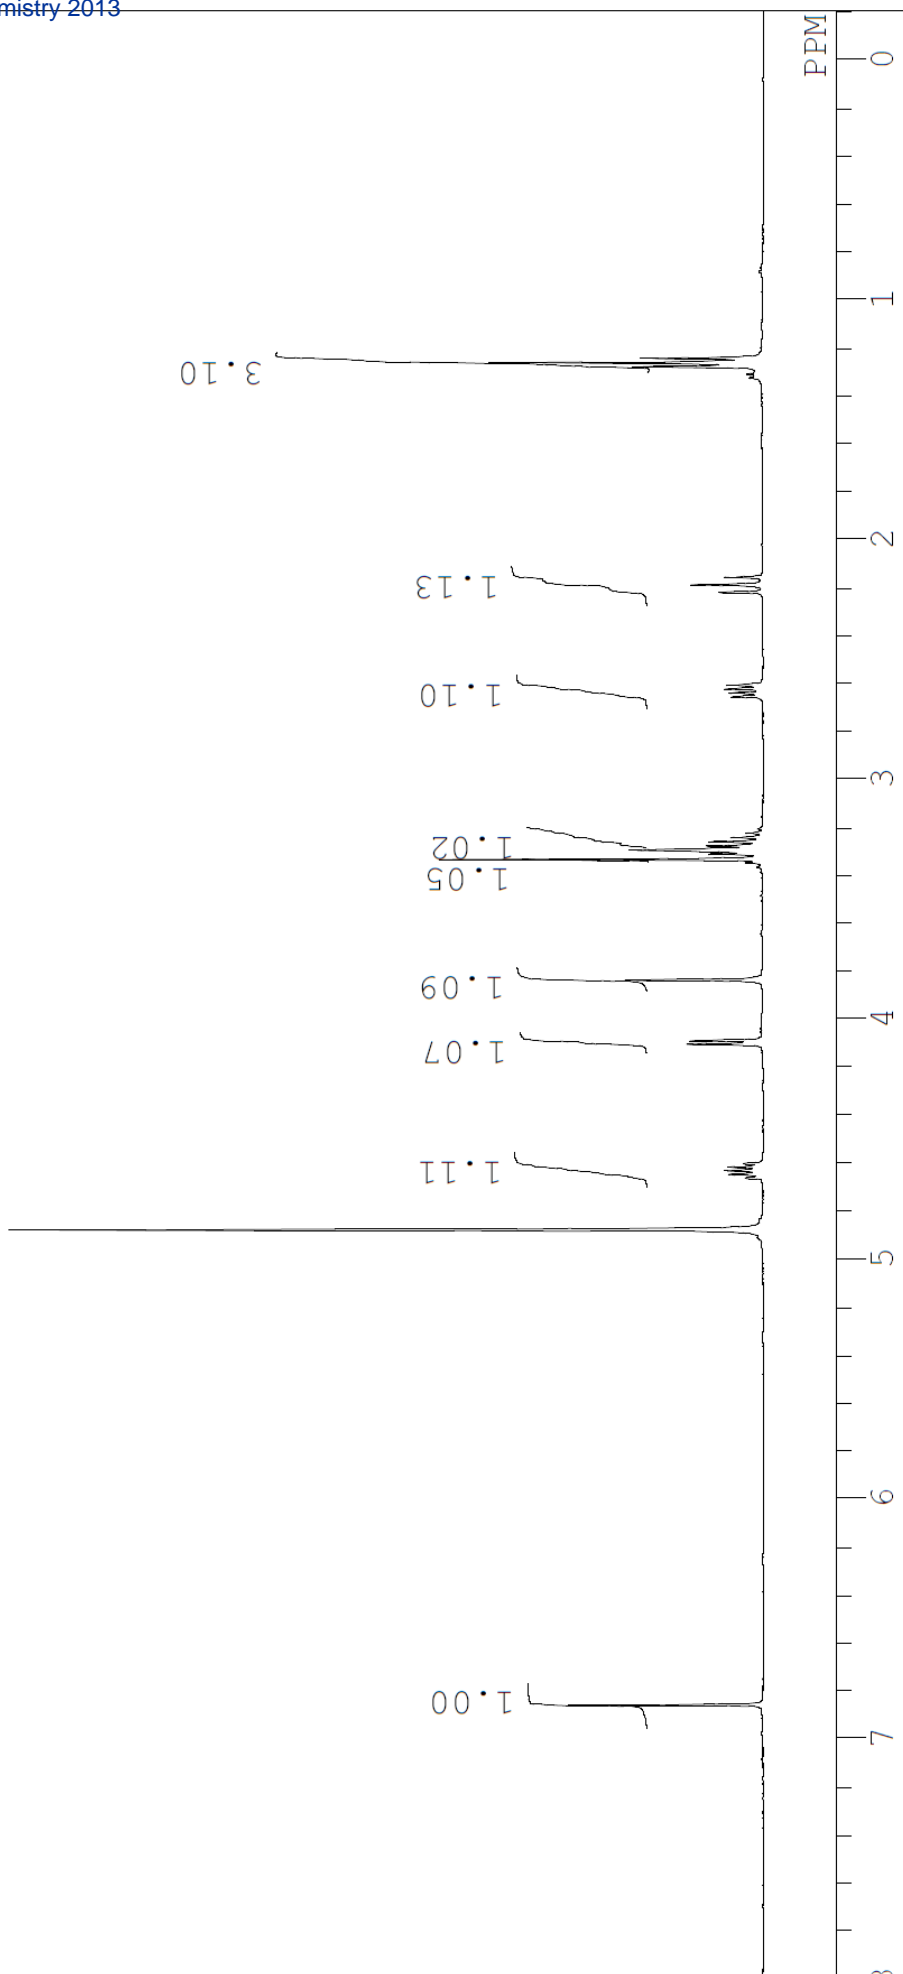

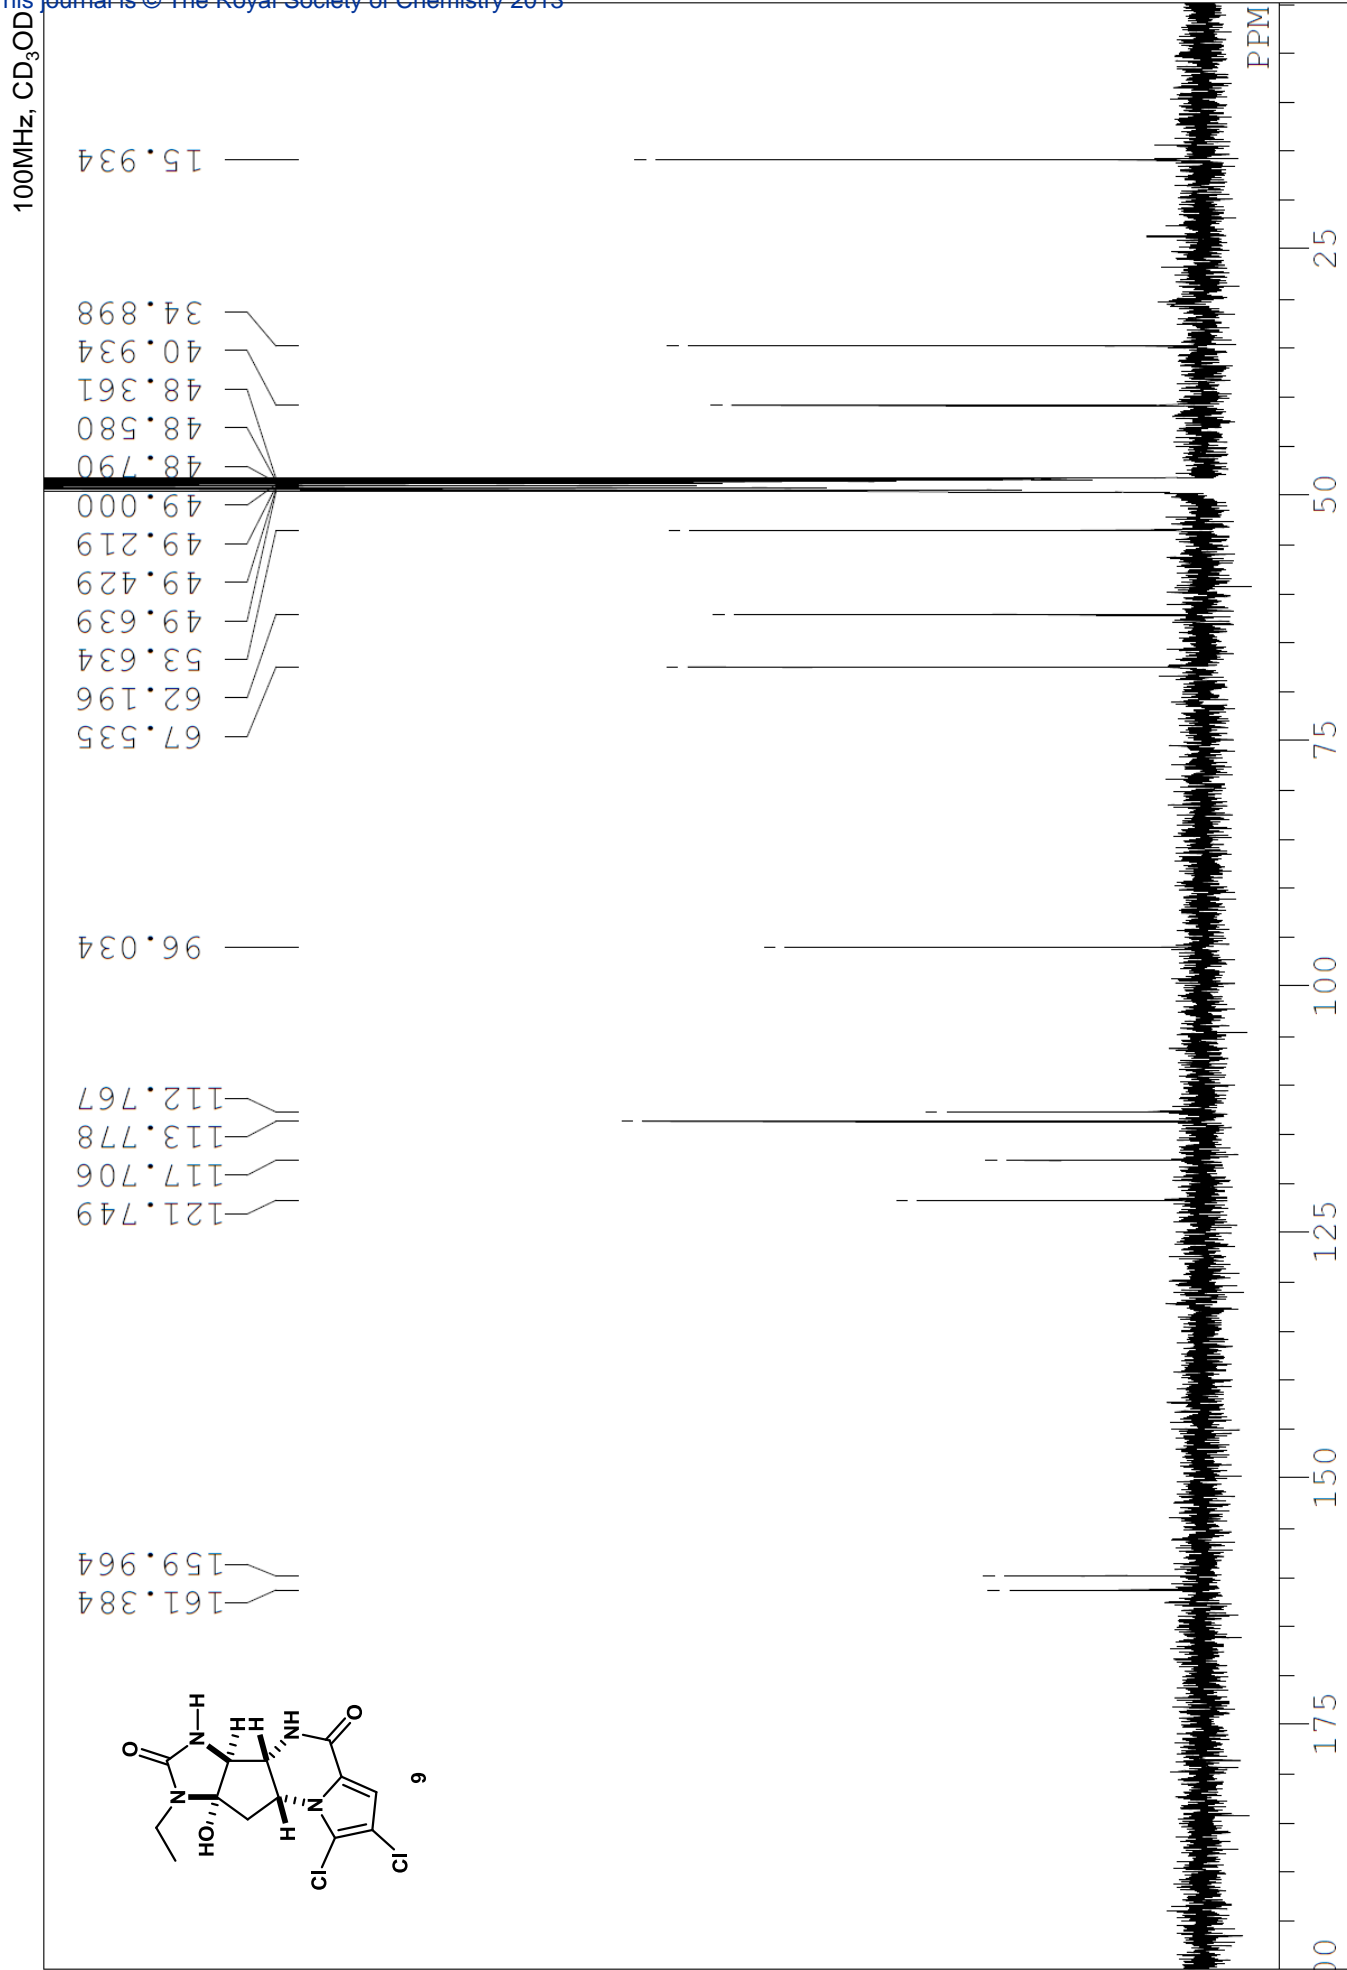

400MHz, CD<sub>3</sub>OD

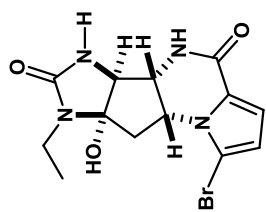

10

3.06

1.00

1.03

1.03

0.98

1.00

1.02

1.00

1.00

PPM

0

1

2

3

4

5

6

7

8

100MHz, CD<sub>3</sub>OD

16.001  
34.860  
41.096  
48.361  
48.571  
48.781  
49.000  
49.210  
49.420  
49.639  
54.330  
62.291  
67.526

96.044  
107.190  
113.797  
116.019  
124.152

161.480  
161.041

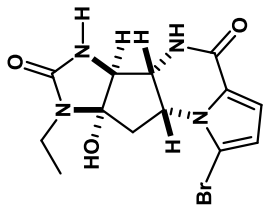

P.PM

25  
50  
75  
100  
125  
150  
175  
200

500MHz, DMSO-d6

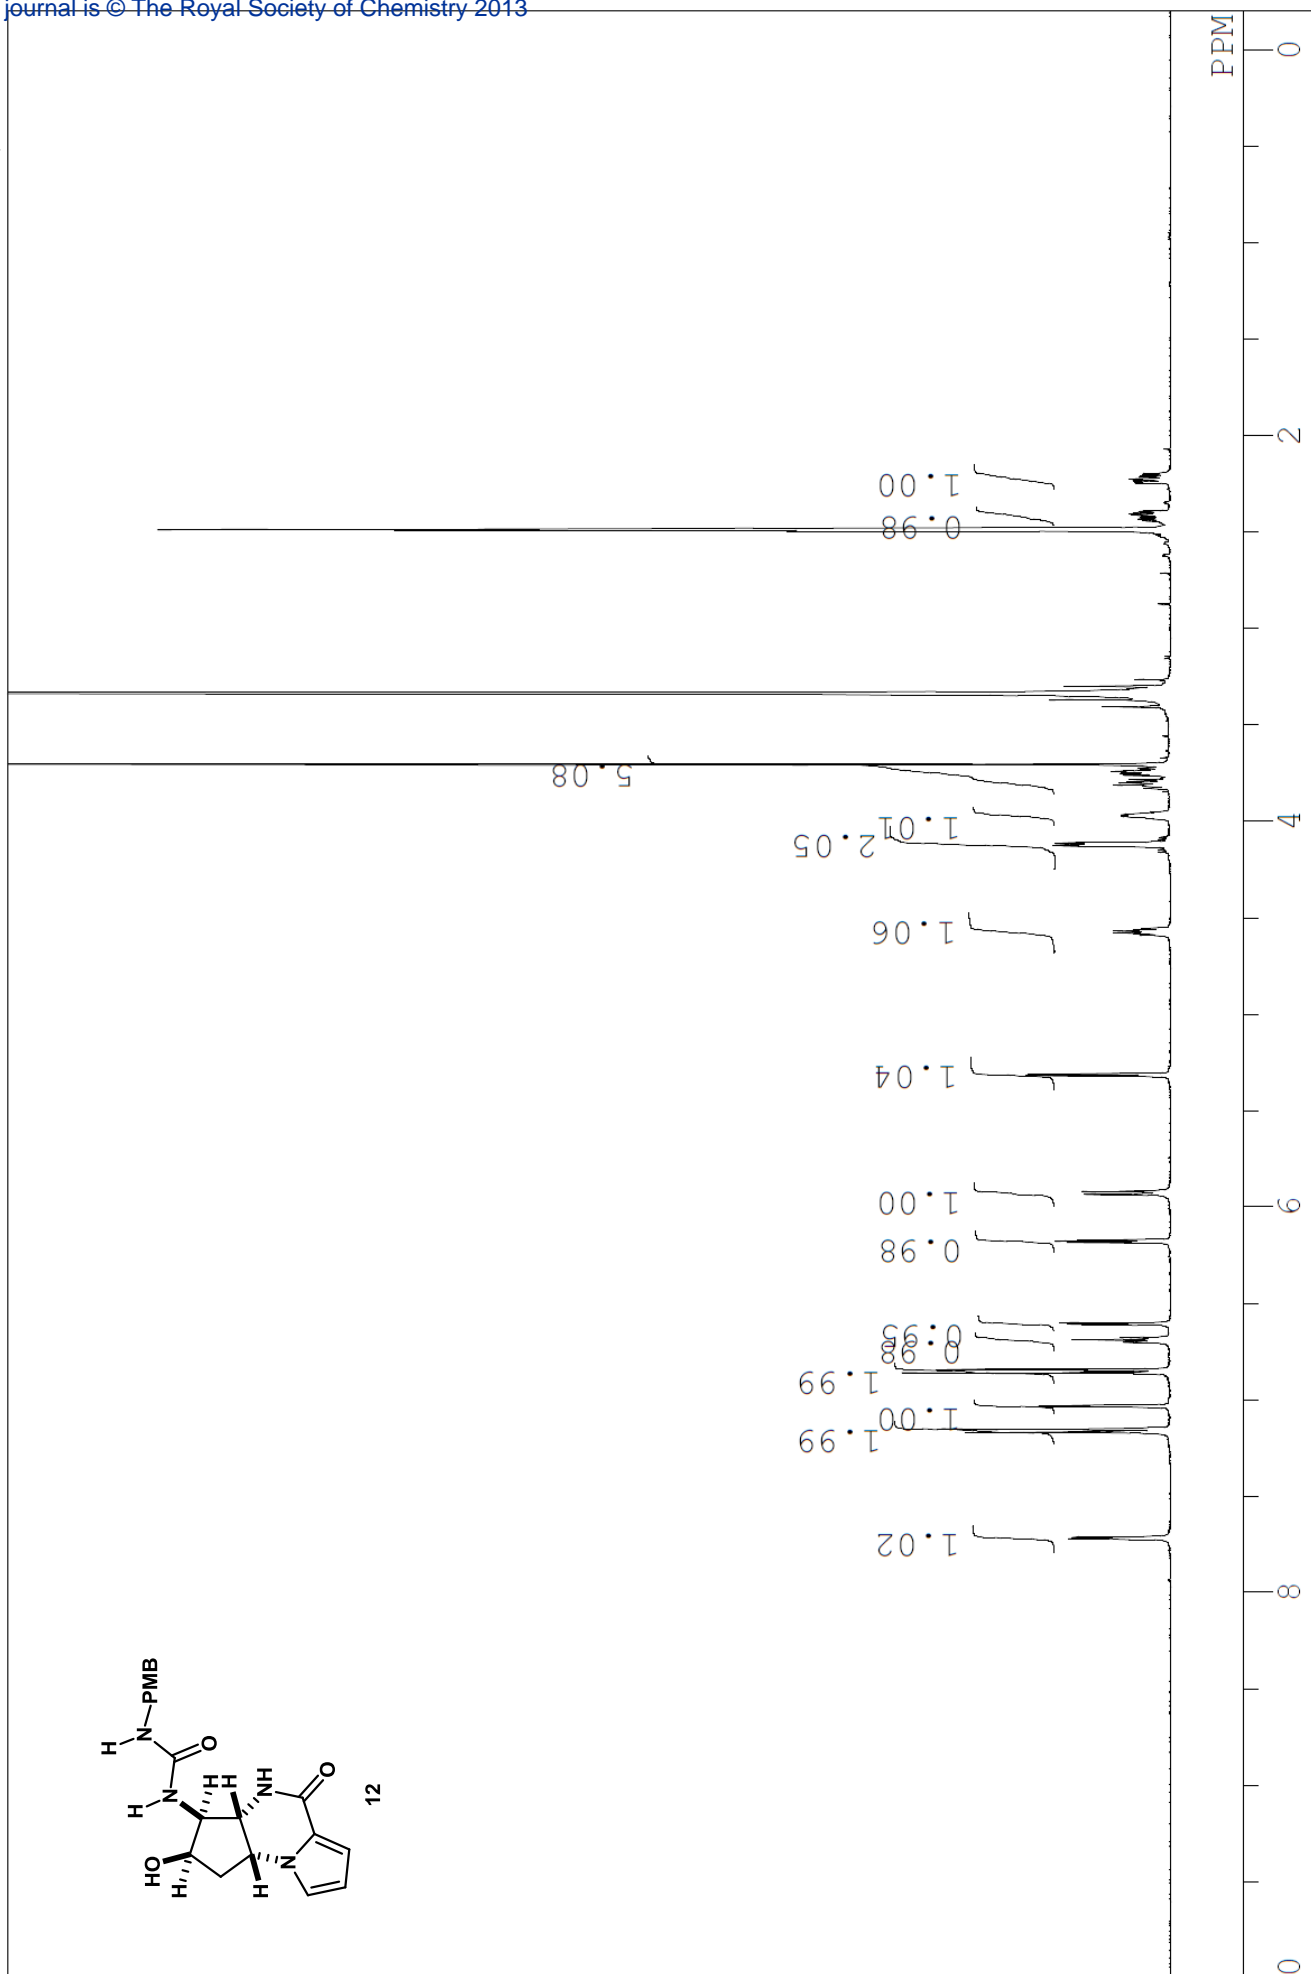

125MHz, DMSO-d6

38.994  
39.166  
39.328  
39.500  
39.662  
39.834  
39.996  
42.409  
51.385  
55.048  
57.423  
58.596  
67.371

109.503  
111.840  
113.633  
122.437  
123.391  
128.465  
132.491

157.682  
158.035

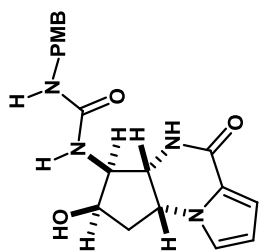

PPM

25

50

75

100

125

150

175

200

400MHz, CD<sub>3</sub>OD

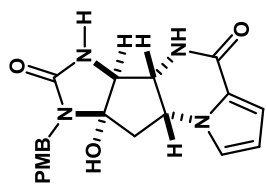

13

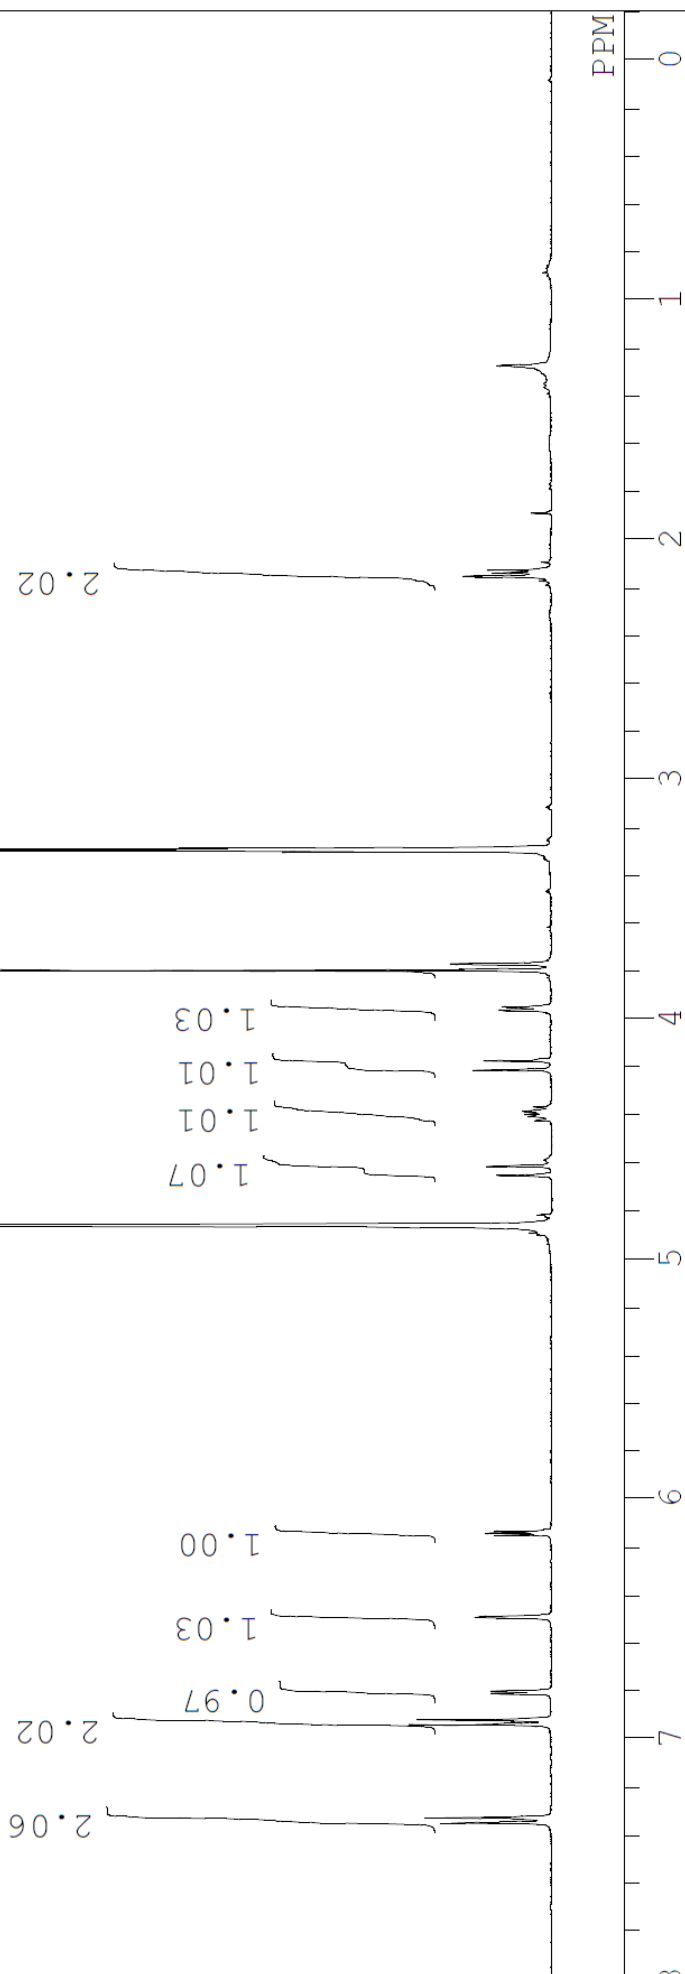



100MHz, CD<sub>3</sub>OD

42.259  
42.431  
48.361  
48.571  
48.781  
49.000  
49.210  
49.420  
49.639  
55.379  
55.770  
62.825  
68.079

95.834

111.108  
115.008  
115.294  
122.836  
124.943  
130.292  
132.666

160.669  
161.565  
161.871

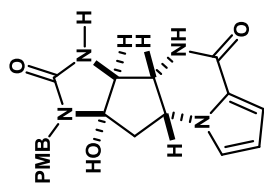

13

PPM

25

50

75

100

125

150

175

200

400MHz, CD<sub>3</sub>OD

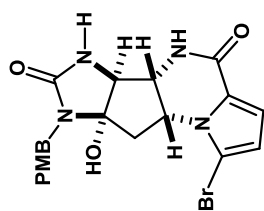

14

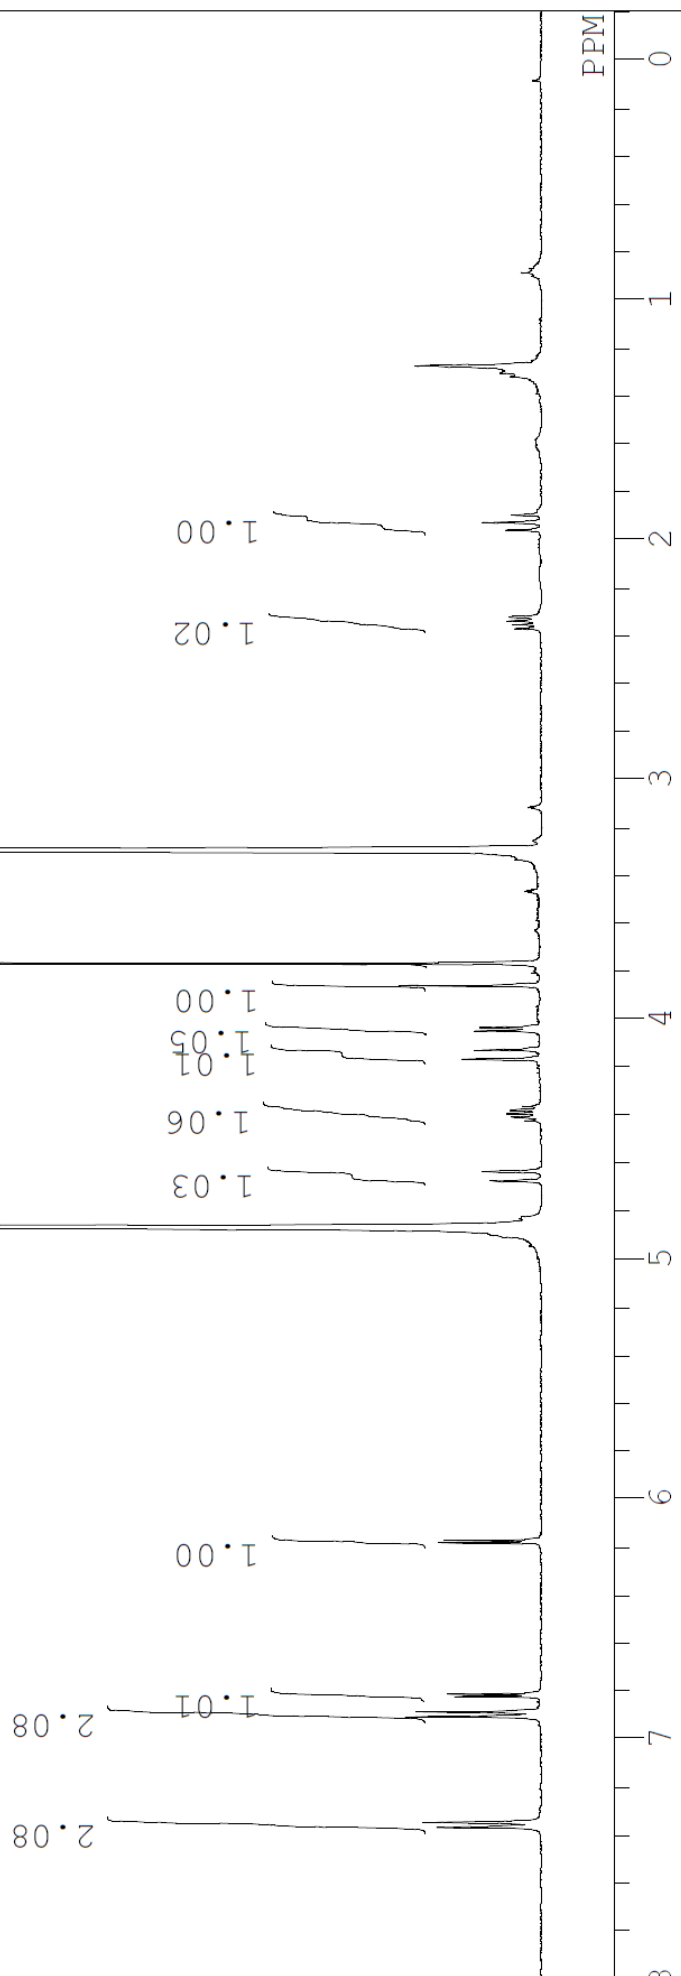

100MHz, CD<sub>3</sub>OD

40.867  
42.135  
48.361  
48.571  
48.781  
49.000  
49.210  
49.420  
49.639  
54.120  
55.779  
62.081  
67.774

95.910

107.075  
113.521  
115.437  
115.876  
124.009  
130.397  
133.000

160.612  
160.984  
161.842

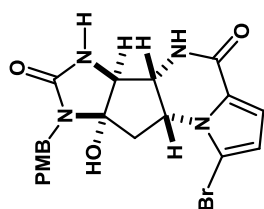

14

PPM

25

50

75

100

125

150

175

200

400MHz, CD<sub>3</sub>OD

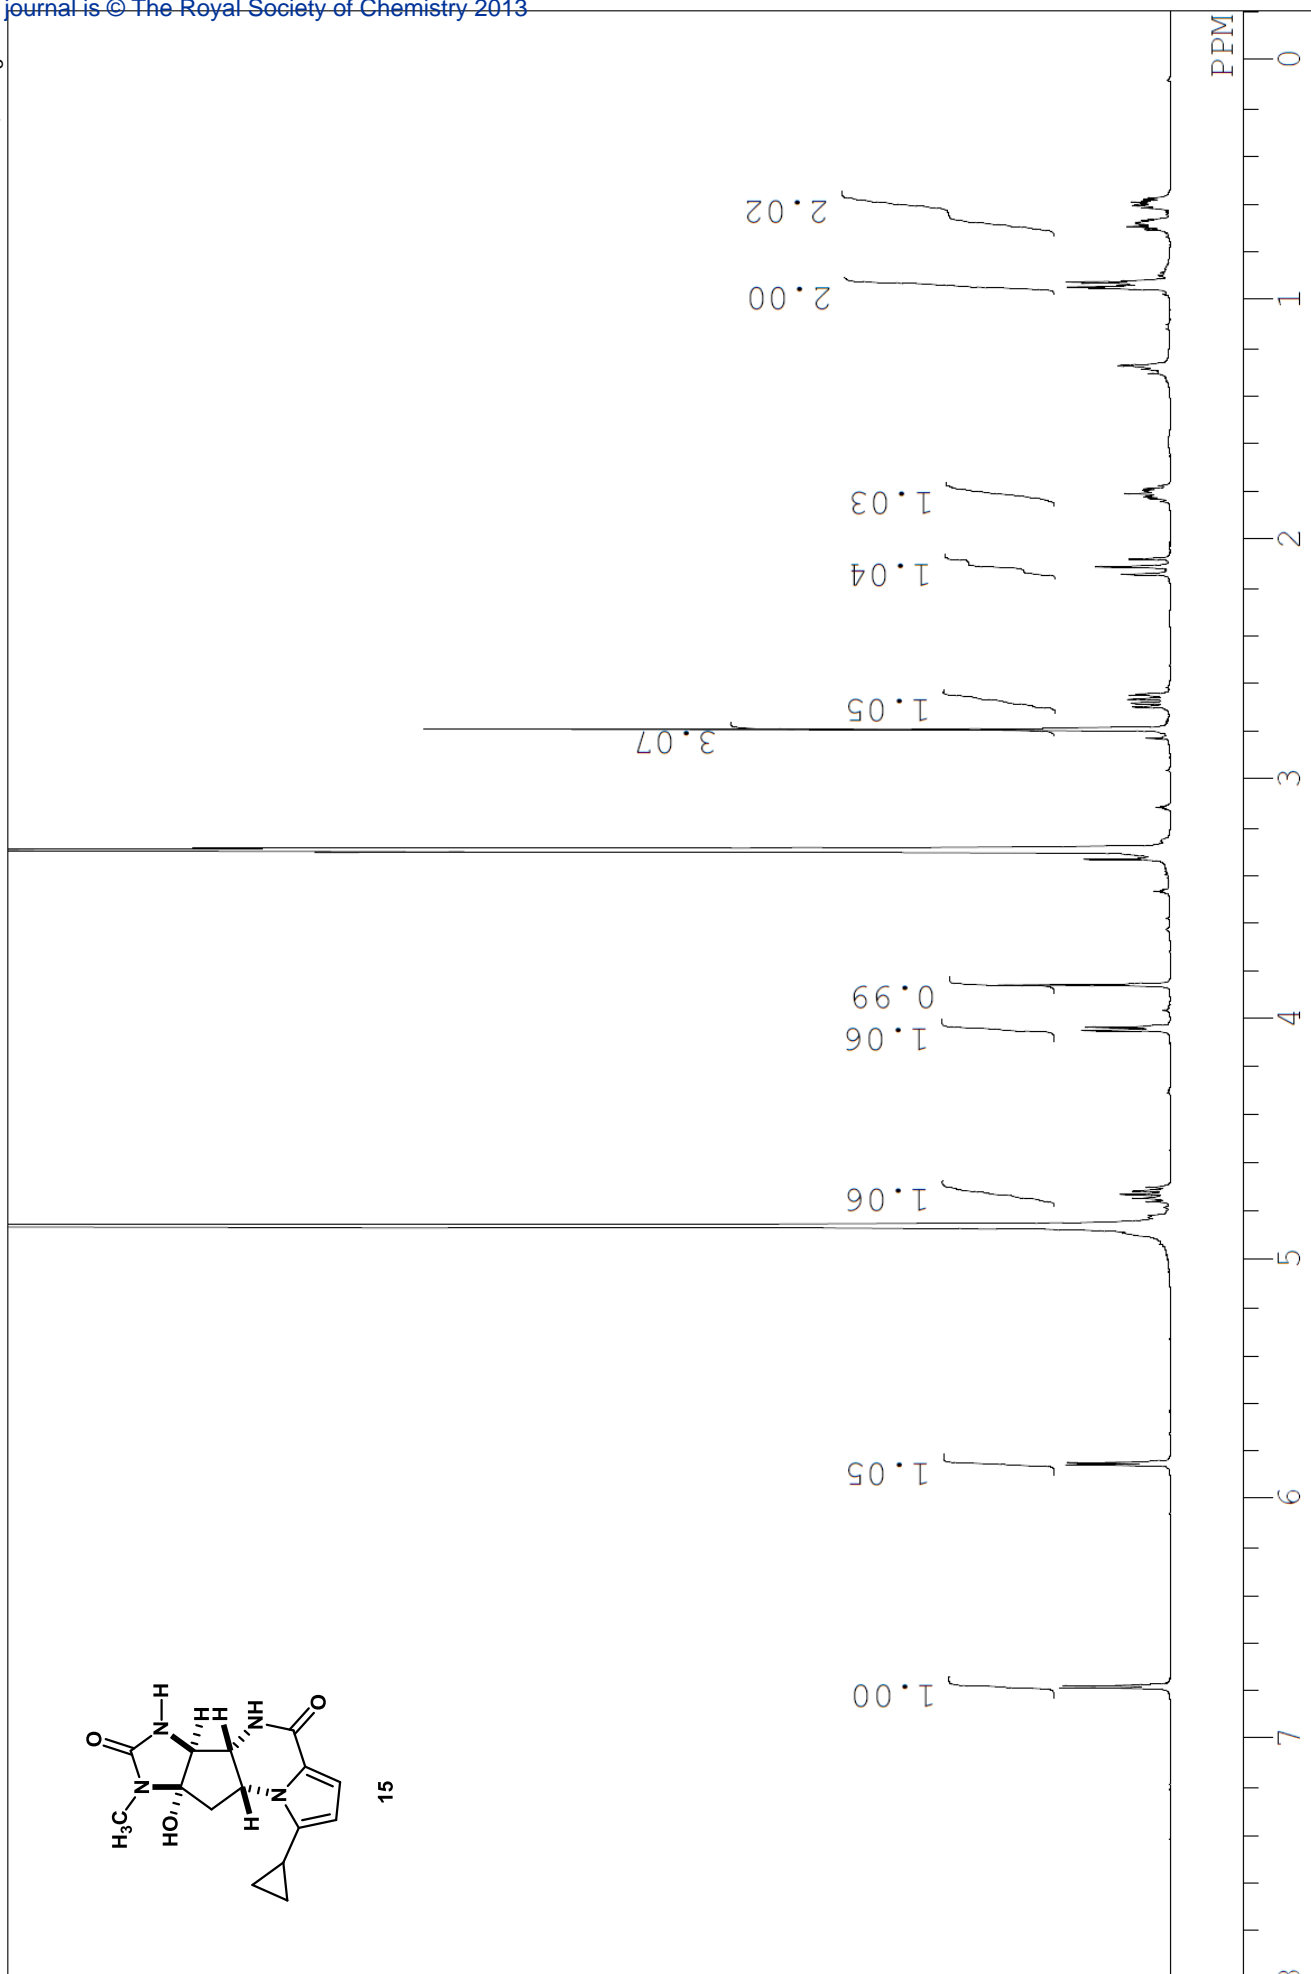

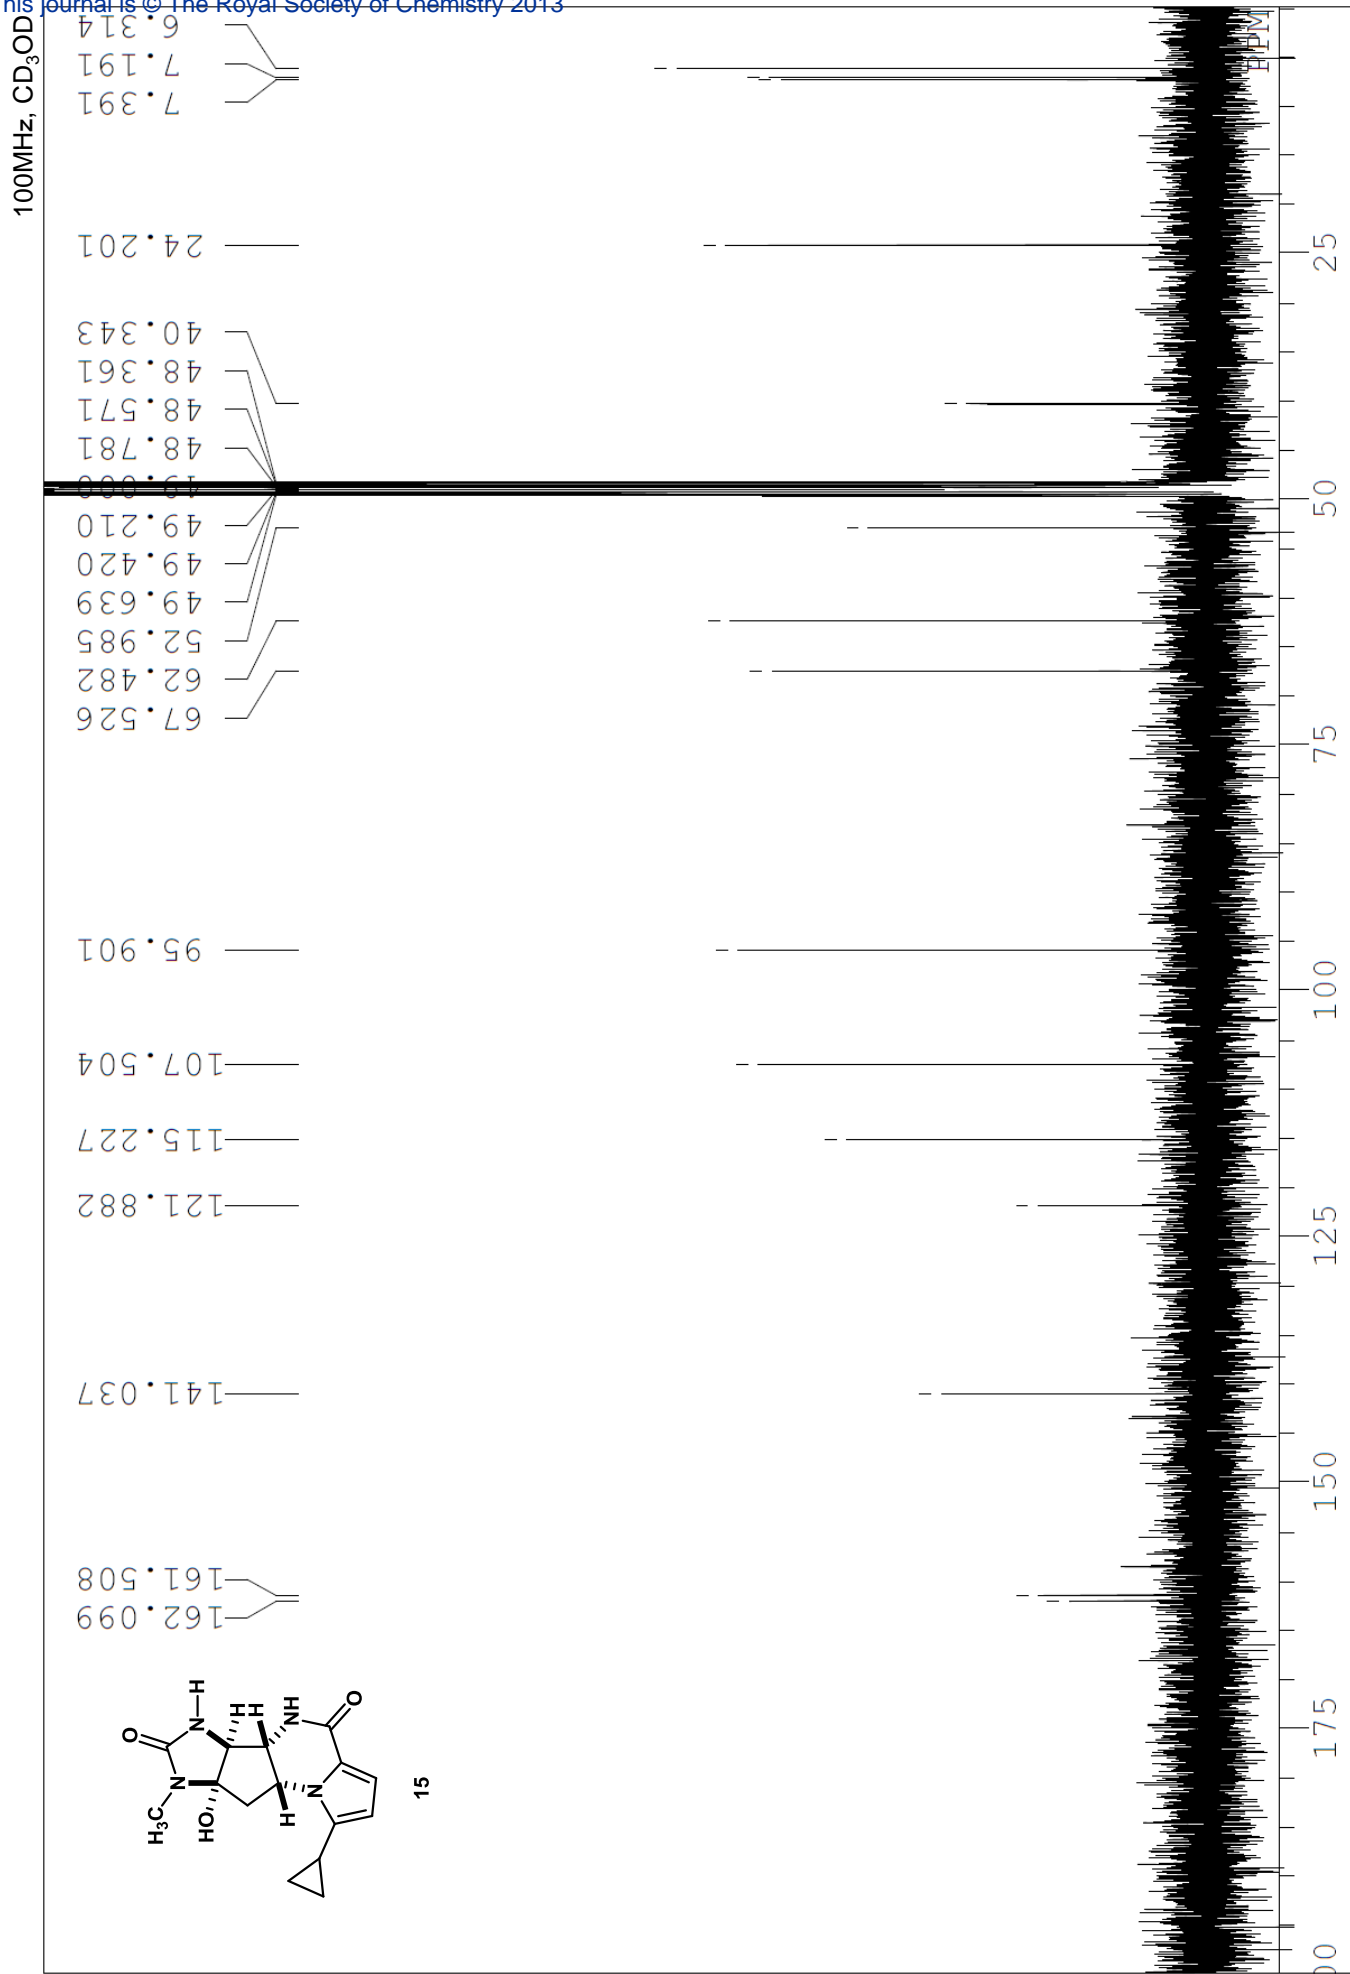

400MHz, CD<sub>3</sub>OD

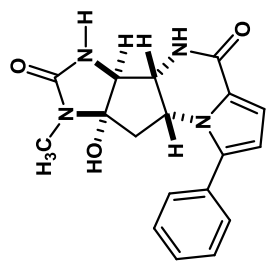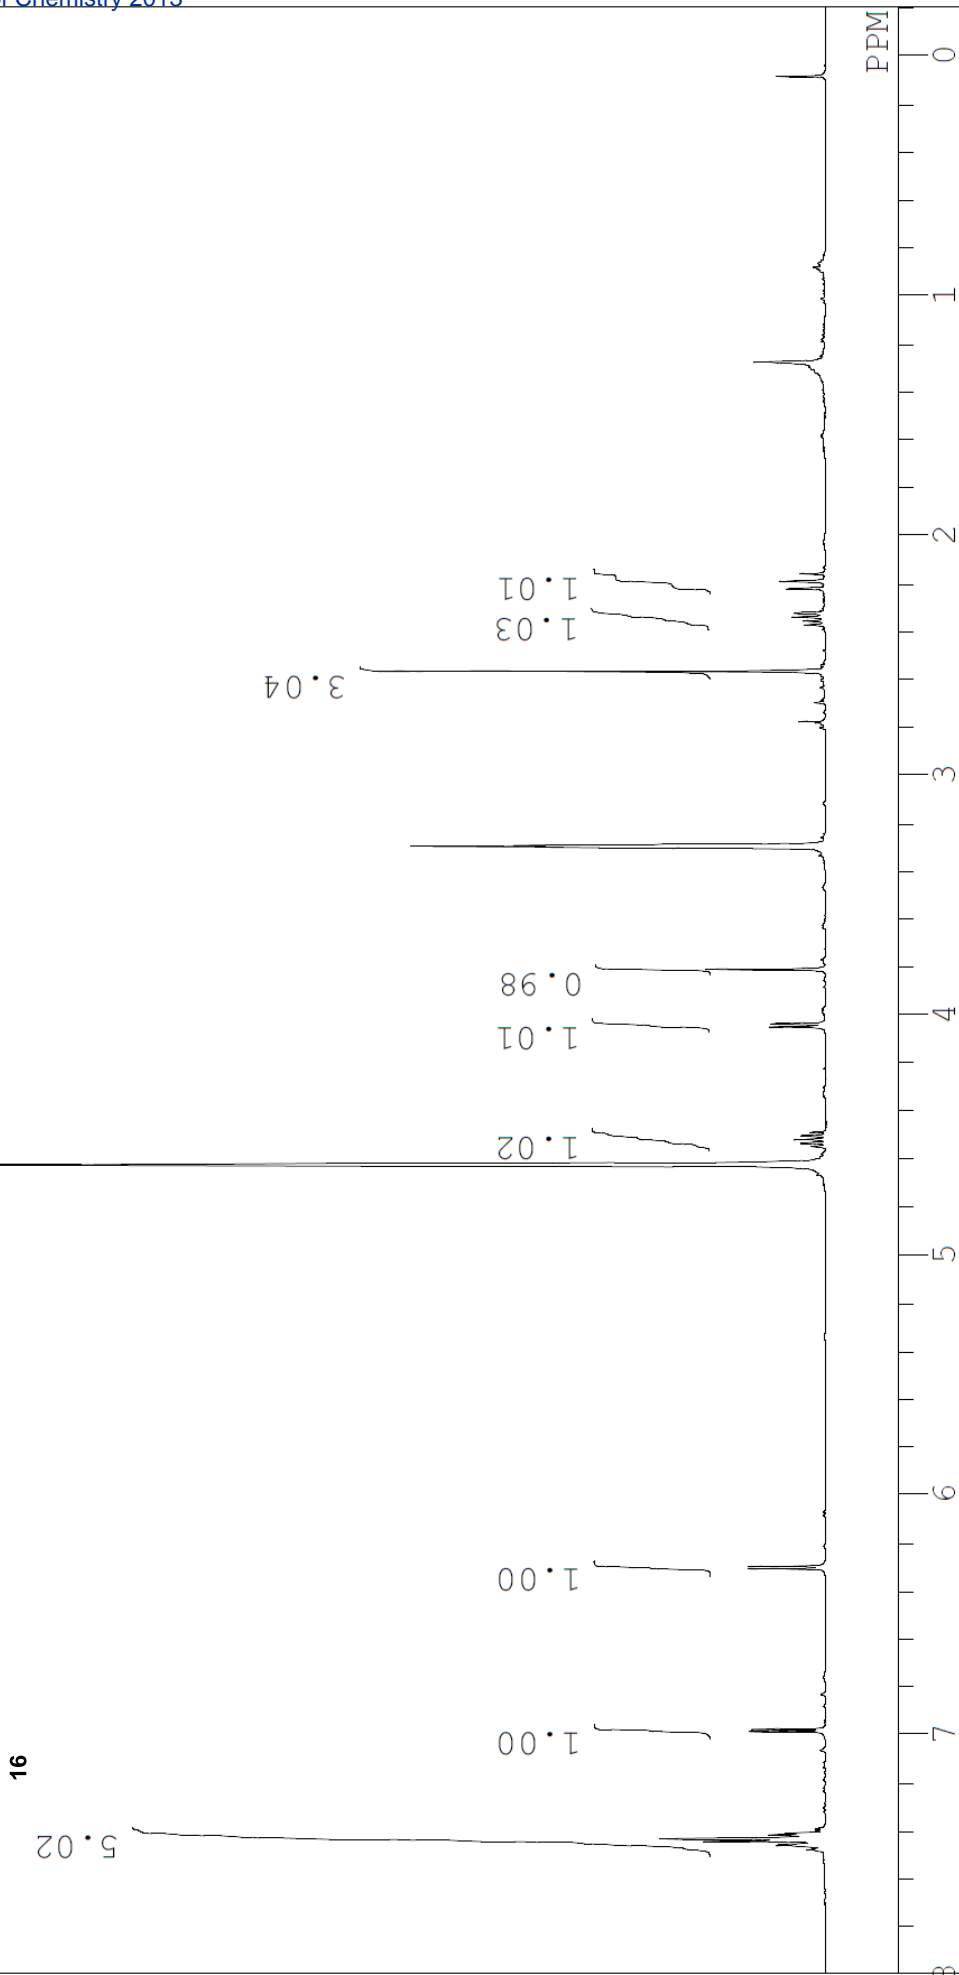

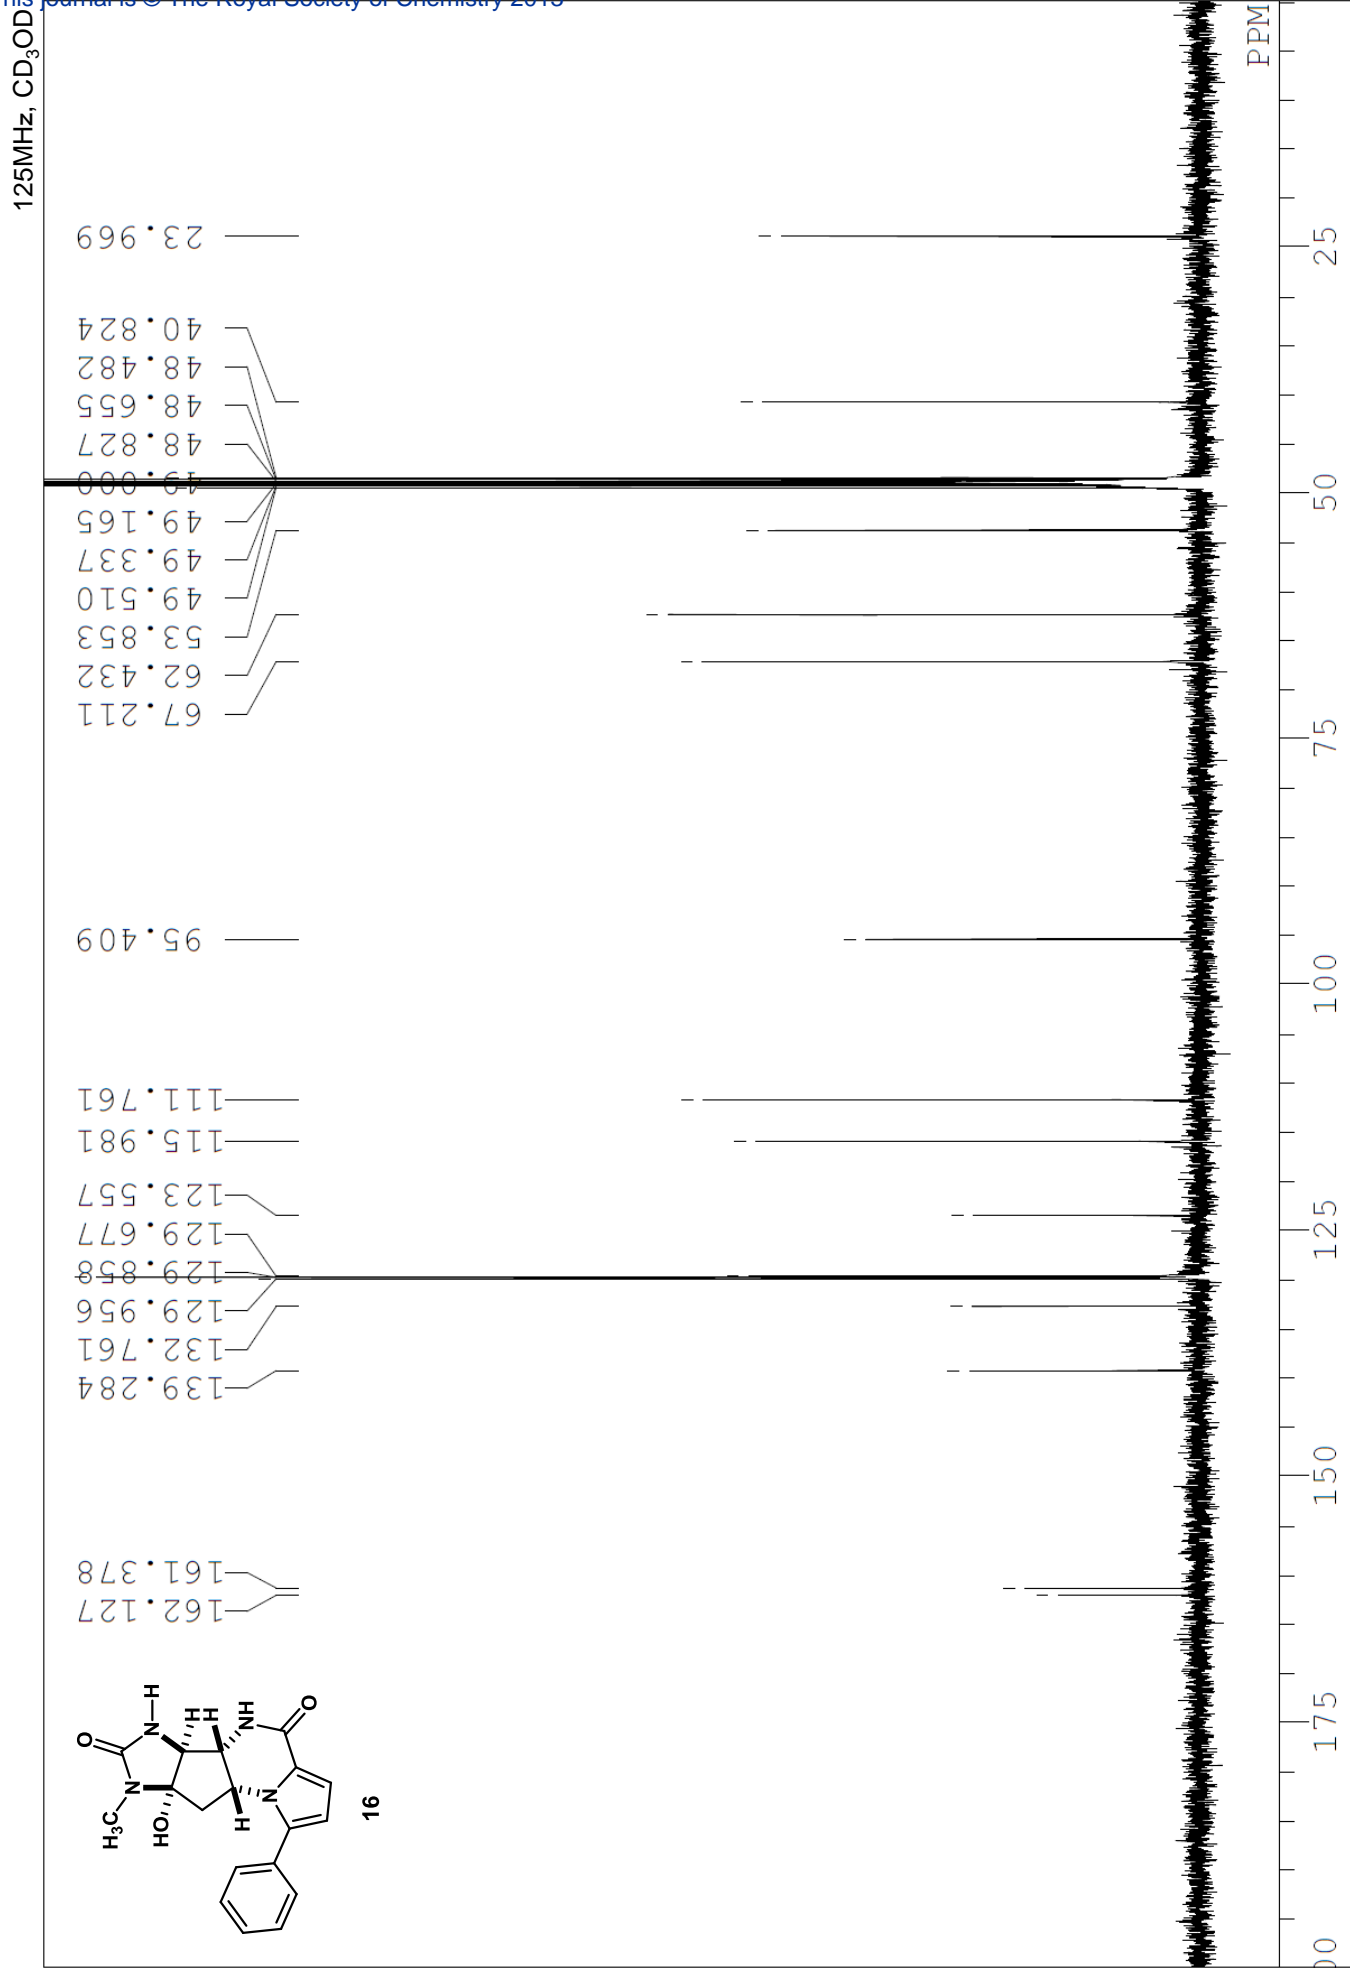

400MHz, CD<sub>3</sub>OD

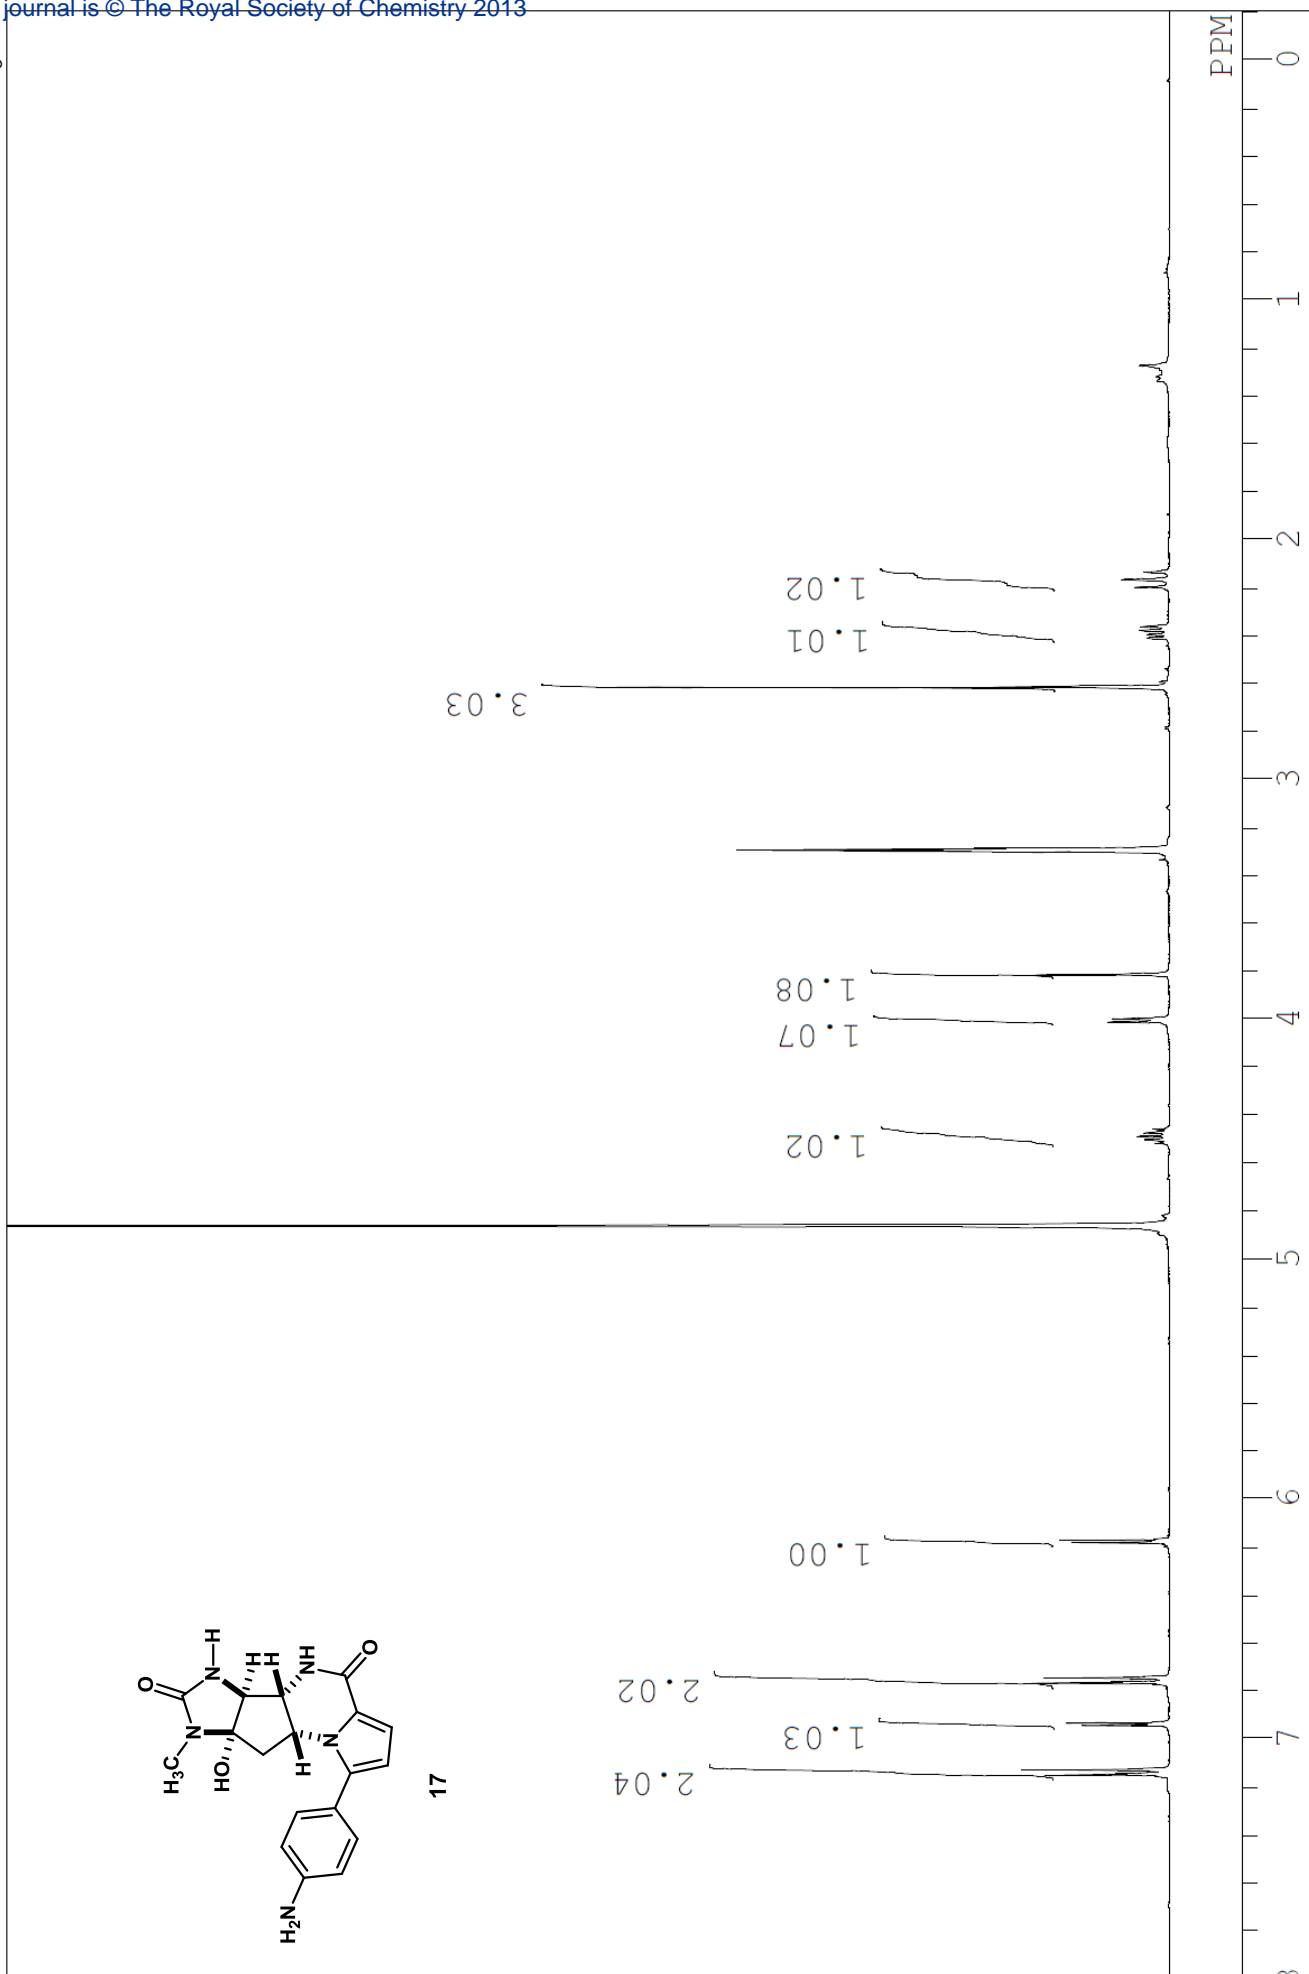



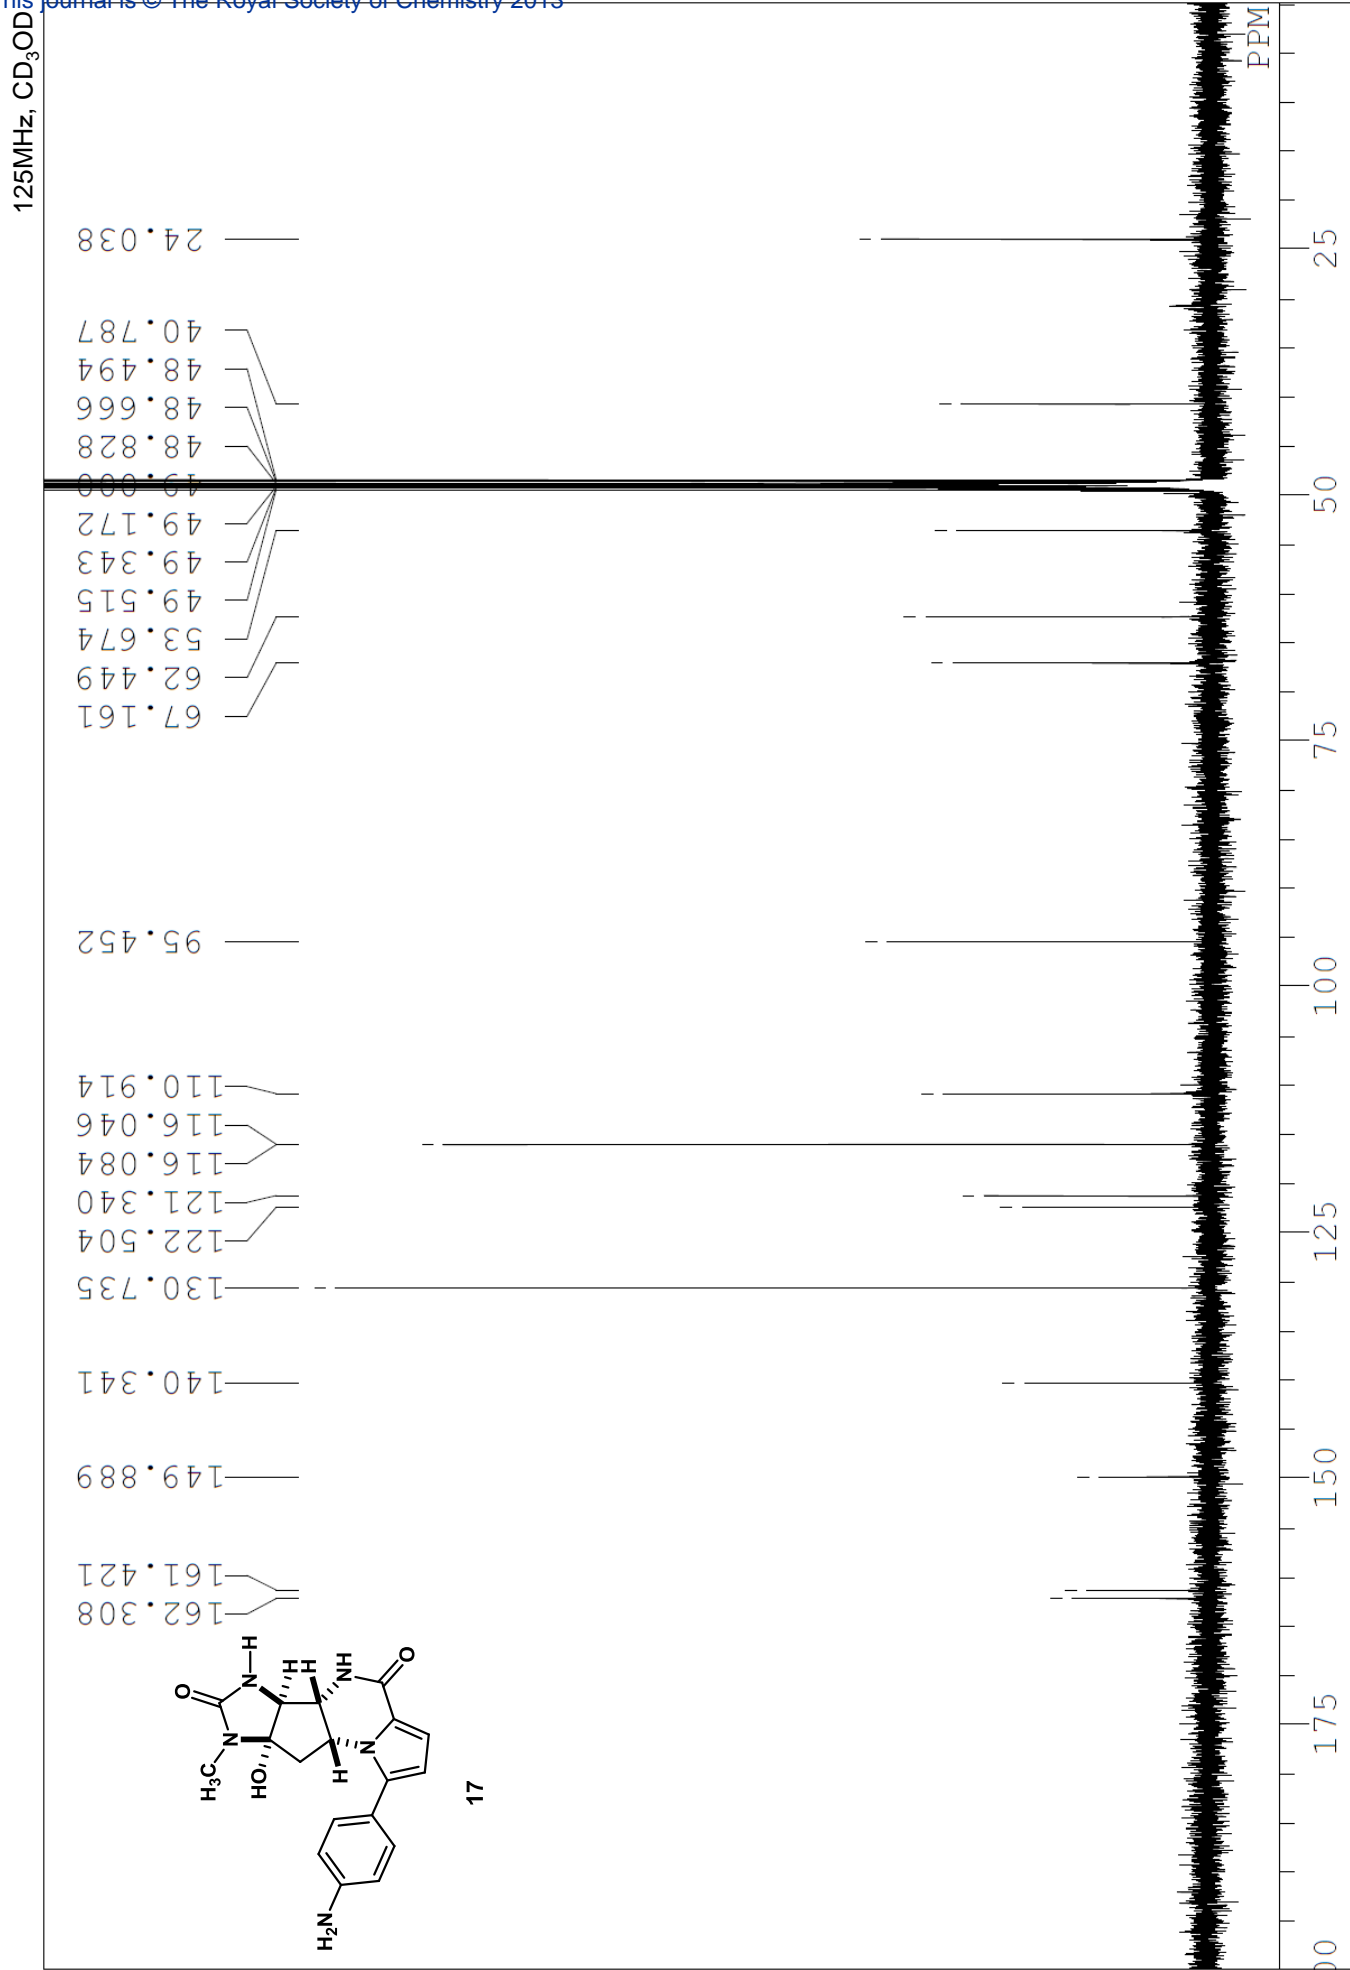

400MHz, CD<sub>3</sub>OD

PPM

0  
1  
2  
3  
4  
5  
6  
7  
8

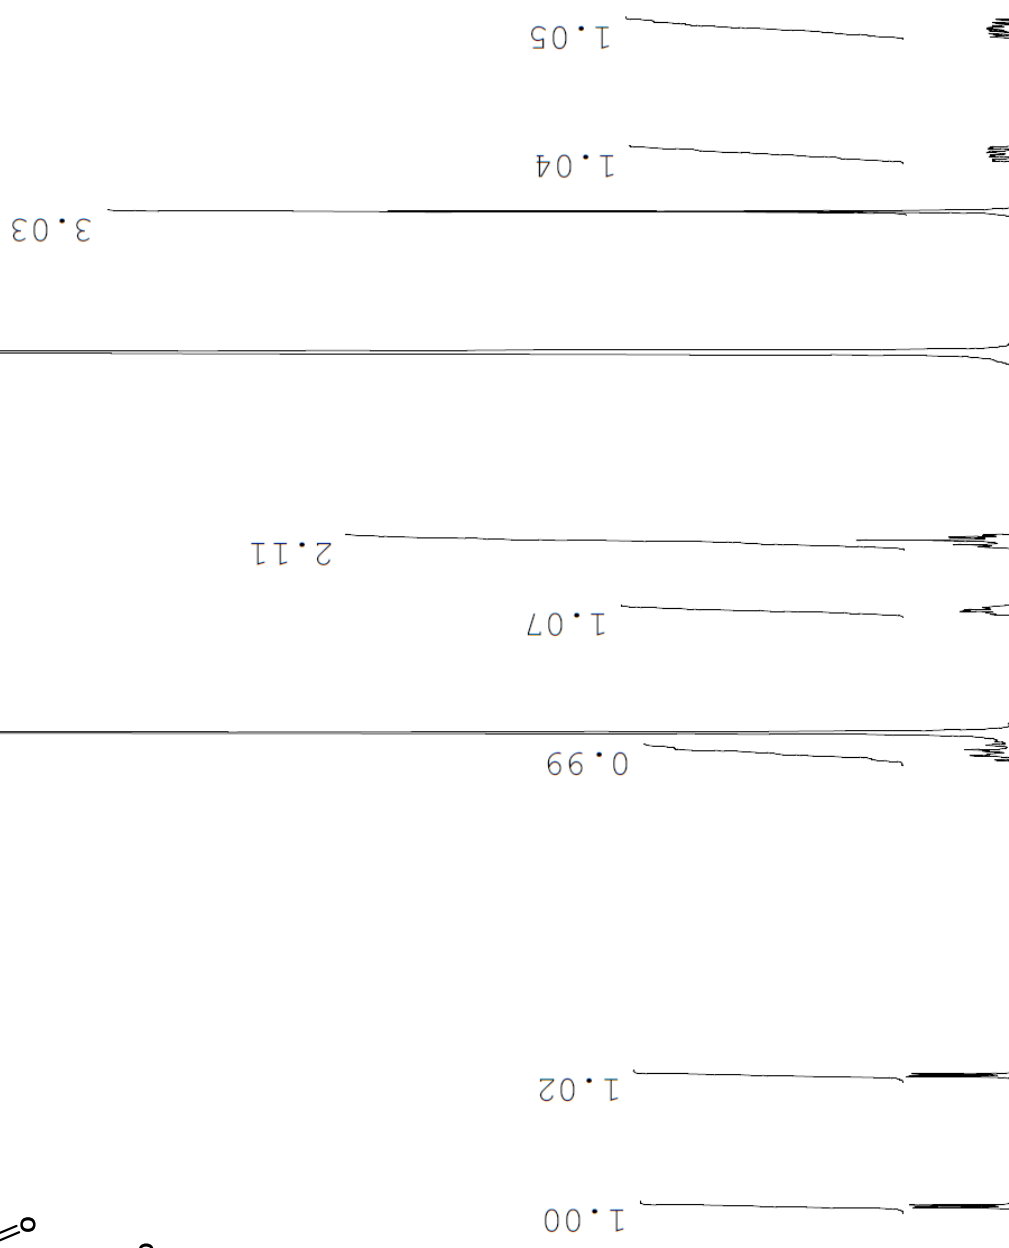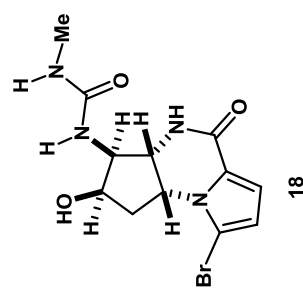

100MHz, CD<sub>3</sub>OD

26.880  
41.115  
48.361  
48.571  
48.781  
49.000  
49.210  
49.420  
49.639  
53.777  
61.109  
62.663  
69.795

106.932  
113.883  
115.380  
123.818

160.154  
161.785

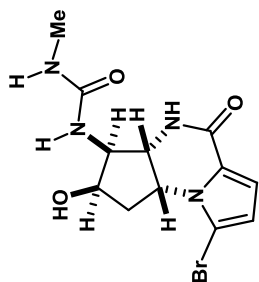

Supplement: c3md00094j.pdf [file c3md00094j.pdf]
